# Supplementary material for: Peganumine B-I and two enantiomers: new alkaloids from the seeds of Peganum harmala Linn. and their potential cytotoxicity and cholinesterase inhibitory activities
Source: Royal Society of Chemistry journal article supplement (doi:10.1039/c6ra00086j), 2016-01-01

**Peganumine B-I and two enantiomers, new alkaloids from the seeds of *peganum harmala* linn and its potential cytotoxicity and cholinesterases inhibitory activities**

Ya-di Yang<sup>†1</sup>, Xue-mei Cheng<sup>†‡1</sup>, Wei Liu<sup>†</sup>, Zhu-zhen Han<sup>†</sup>, Gui-xin Chou<sup>†‡</sup>, Ying Wang<sup>§</sup>, Du-xin Sun<sup>#</sup>, Zheng-tao Wang<sup>†‡\*</sup>, Chang-hong Wang<sup>†‡\*</sup>

<sup>†</sup> *Institute of Chinese Materia Medica, Shanghai University of Traditional Chinese Medicine; The MOE Key Laboratory for Standardization of Chinese Medicines and The SATCM Key Laboratory for New Resources and Quality Evaluation of Chinese Medicine, 1200 Cailun Road, Shanghai 201203, China*

<sup>‡</sup> *Shanghai R&D Centre for Standardization of Chinese Medicines, 199 Guoshoujing Road, Shanghai 201203, China*

<sup>§</sup> *College of Pharmacy, Shanghai University of Traditional Chinese Medicine, 1200 Cailun Road, Shanghai 201203, China*

<sup>#</sup> *College of Pharmacy, The University of Michigan, Ann Arbor, MI 48109-1065, USA*

# <sup>13</sup>C and <sup>1</sup>H NMR spectrum of new compounds

## 1.1 NMR spectrum of compound 1

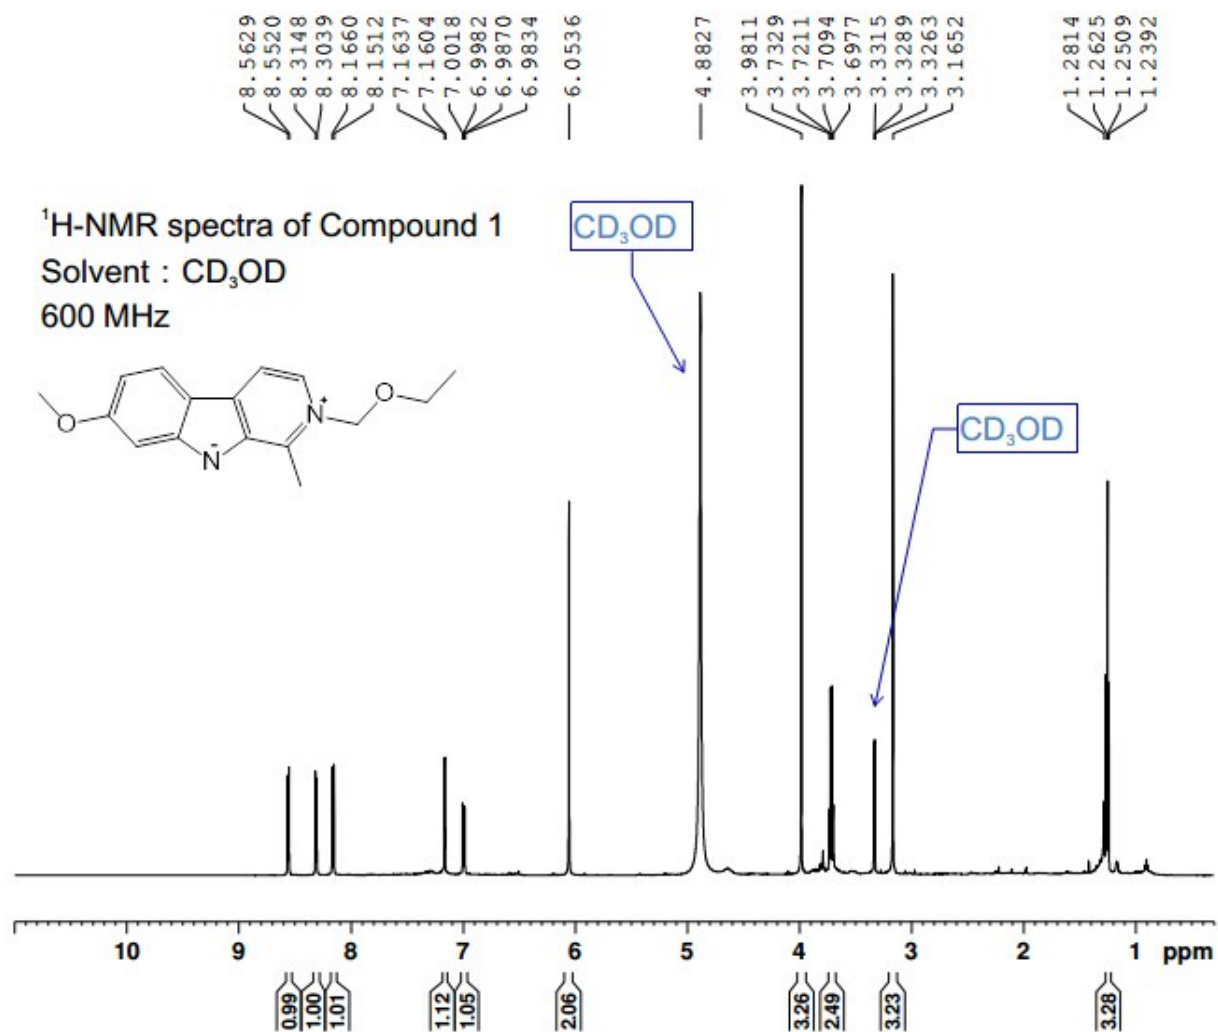

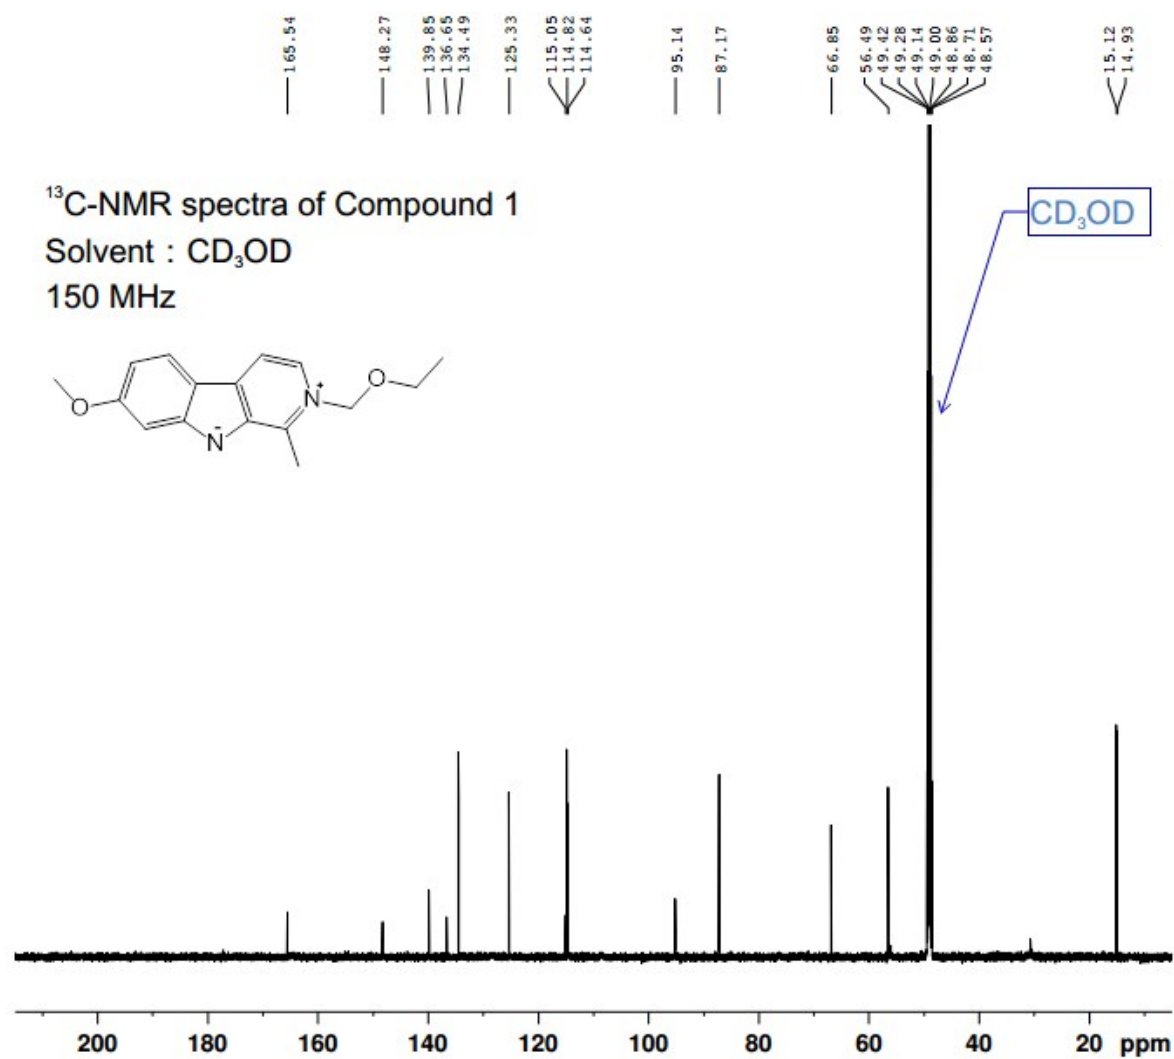

HMQC spectra of Compound 1

Solvent : CD<sub>3</sub>OD

<sup>13</sup>C-NMR 150.9202056 MHz

<sup>1</sup>H-NMR 600.2000000 MHz

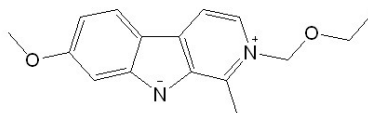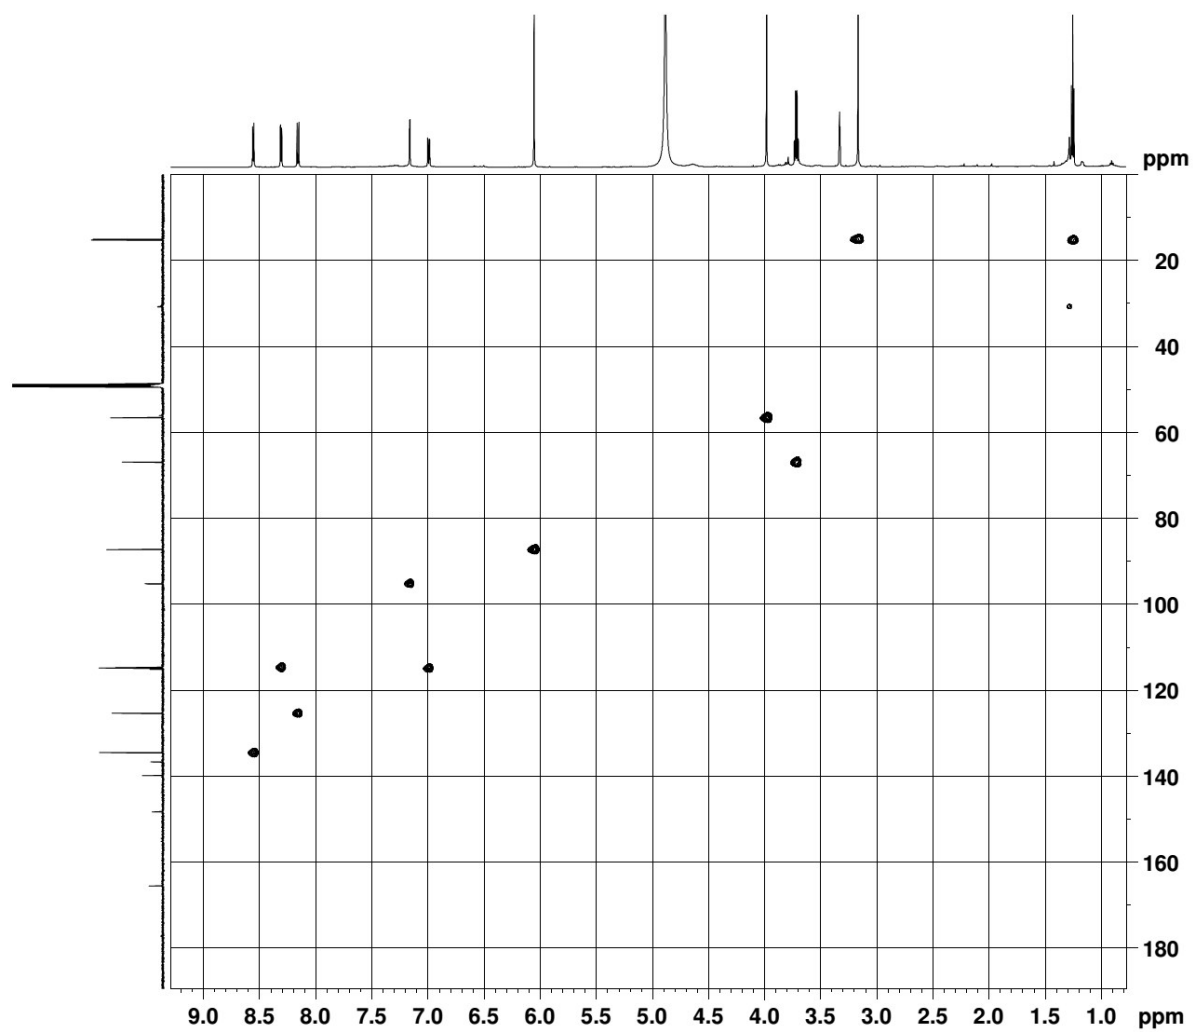

HMBC spectra of Compound 1  
 Solvent : CD<sub>3</sub>OD  
<sup>13</sup>C-NMR 150.9202056MHz  
<sup>1</sup>H-NMR 600.2000000 MHz

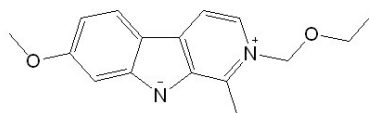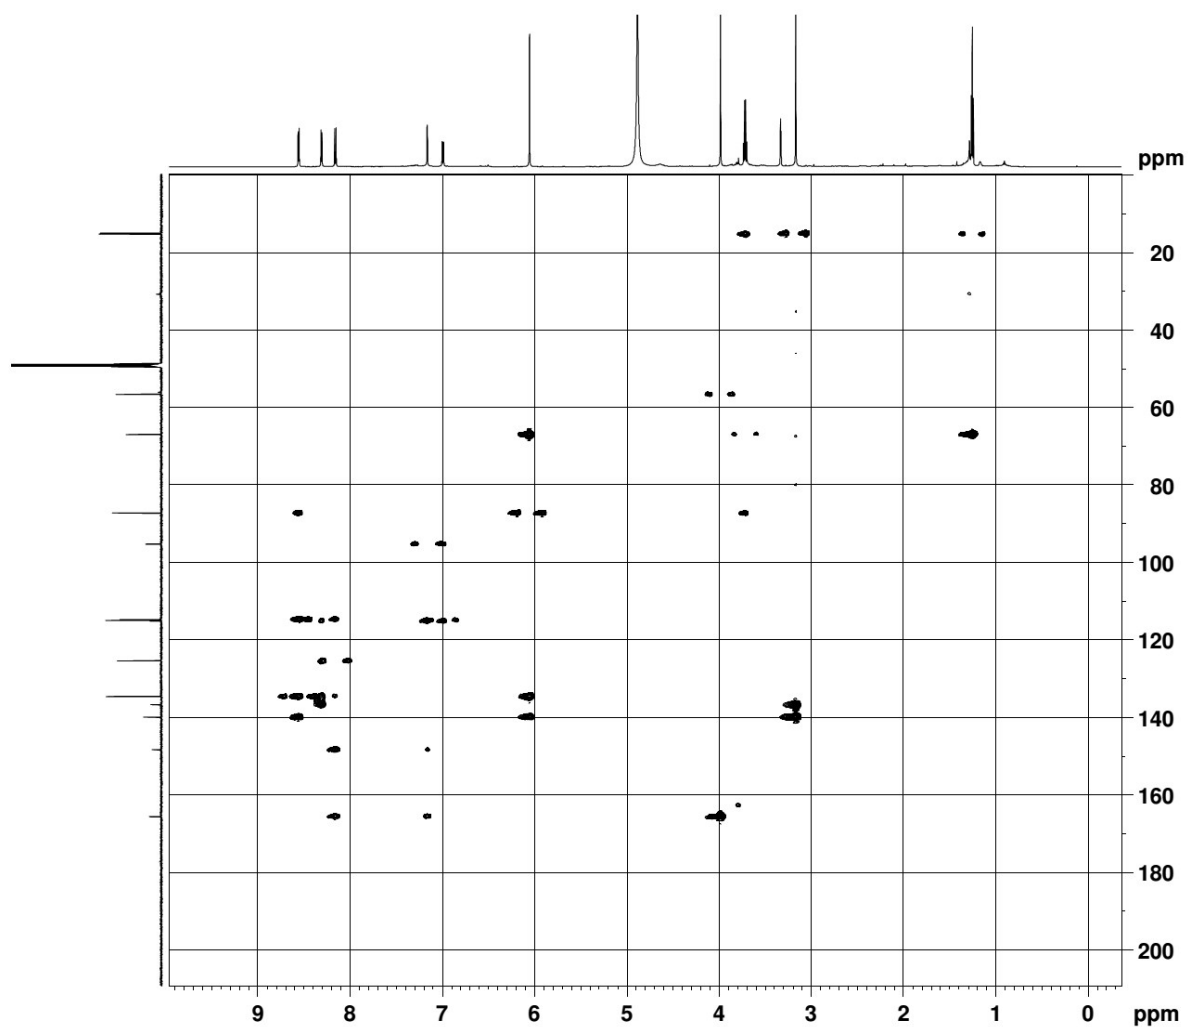

<sup>1</sup>H-<sup>1</sup>H COSY spectra of Compound 1

Solvent : CD<sub>3</sub>OD

<sup>1</sup>H-NMR 600.200000 MHz

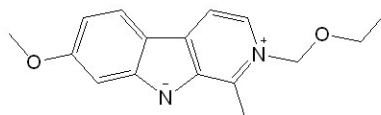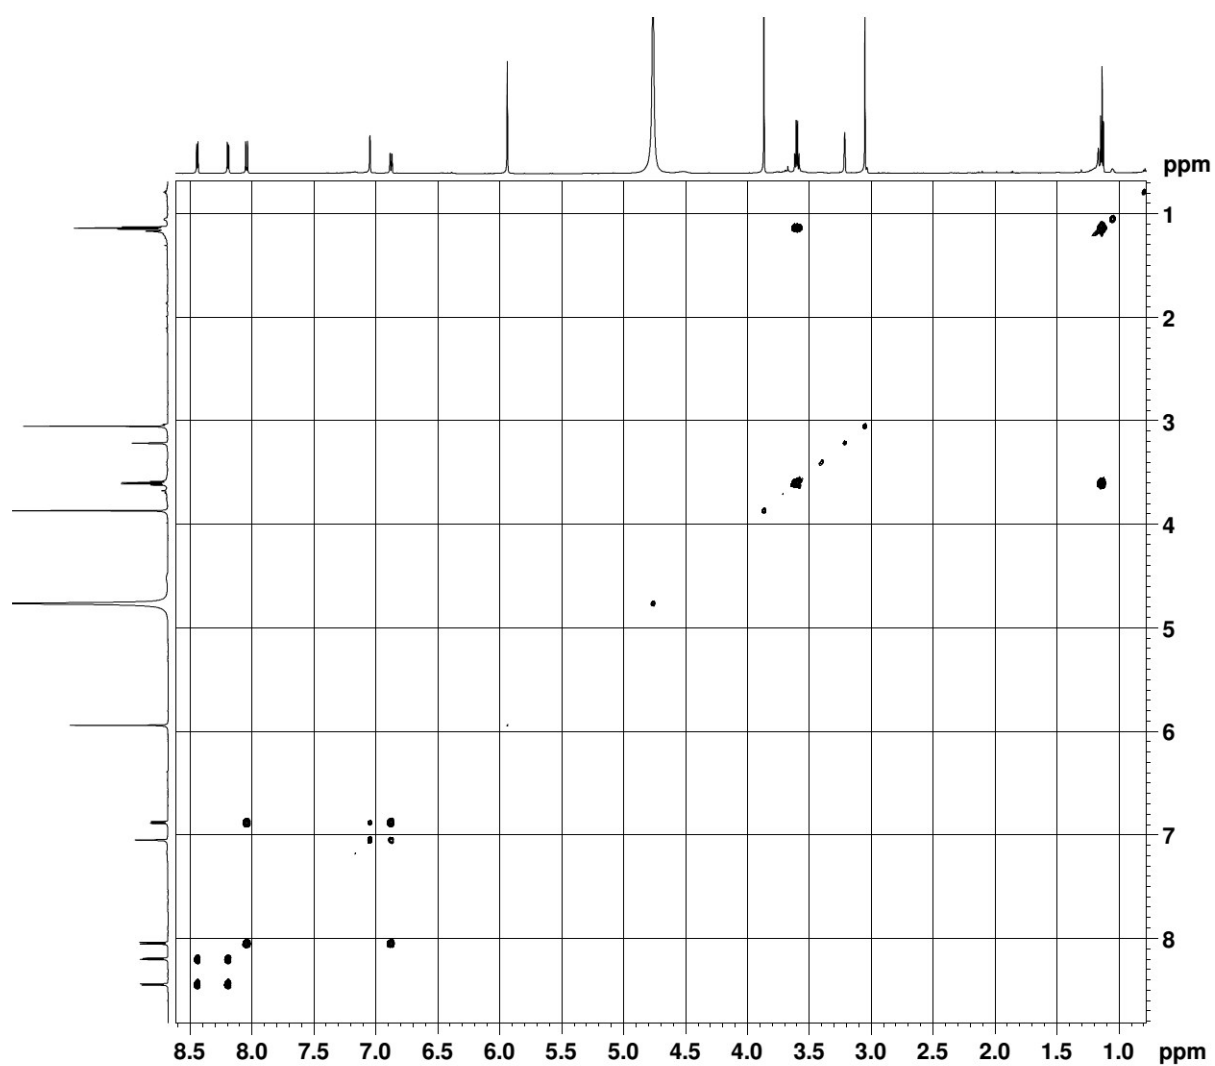

NOESY spectra of Compound 1

Solvent : CD<sub>3</sub>OD

<sup>1</sup>H-NMR 150.9202056MHz

<sup>13</sup>C-NMR 600.2000000 MHz

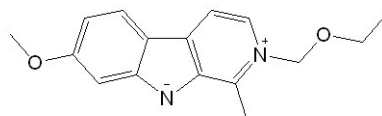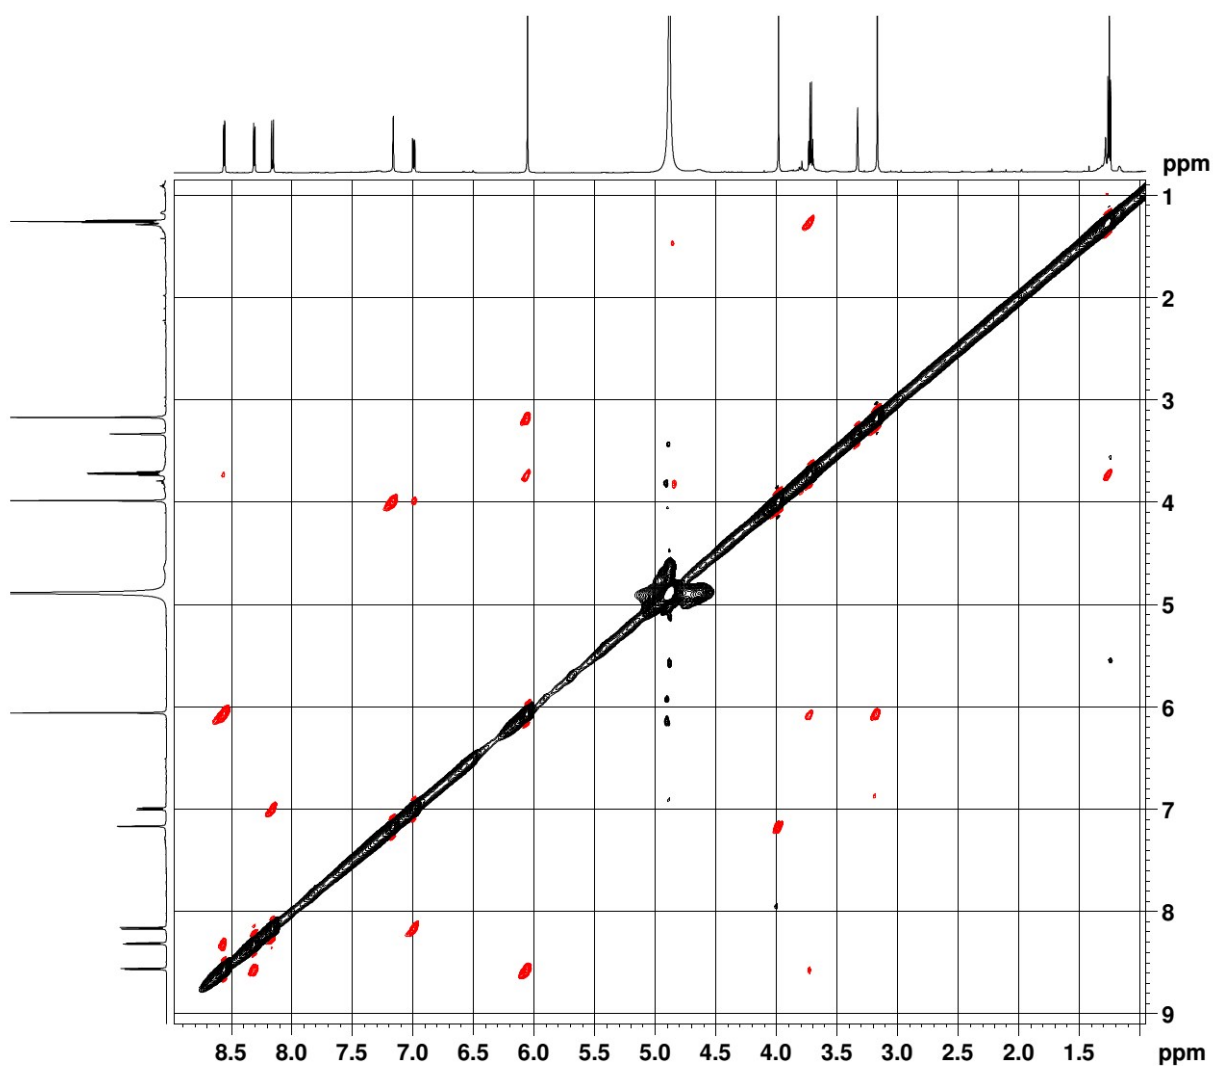

## 1.2 NMR spectrum of compound 2

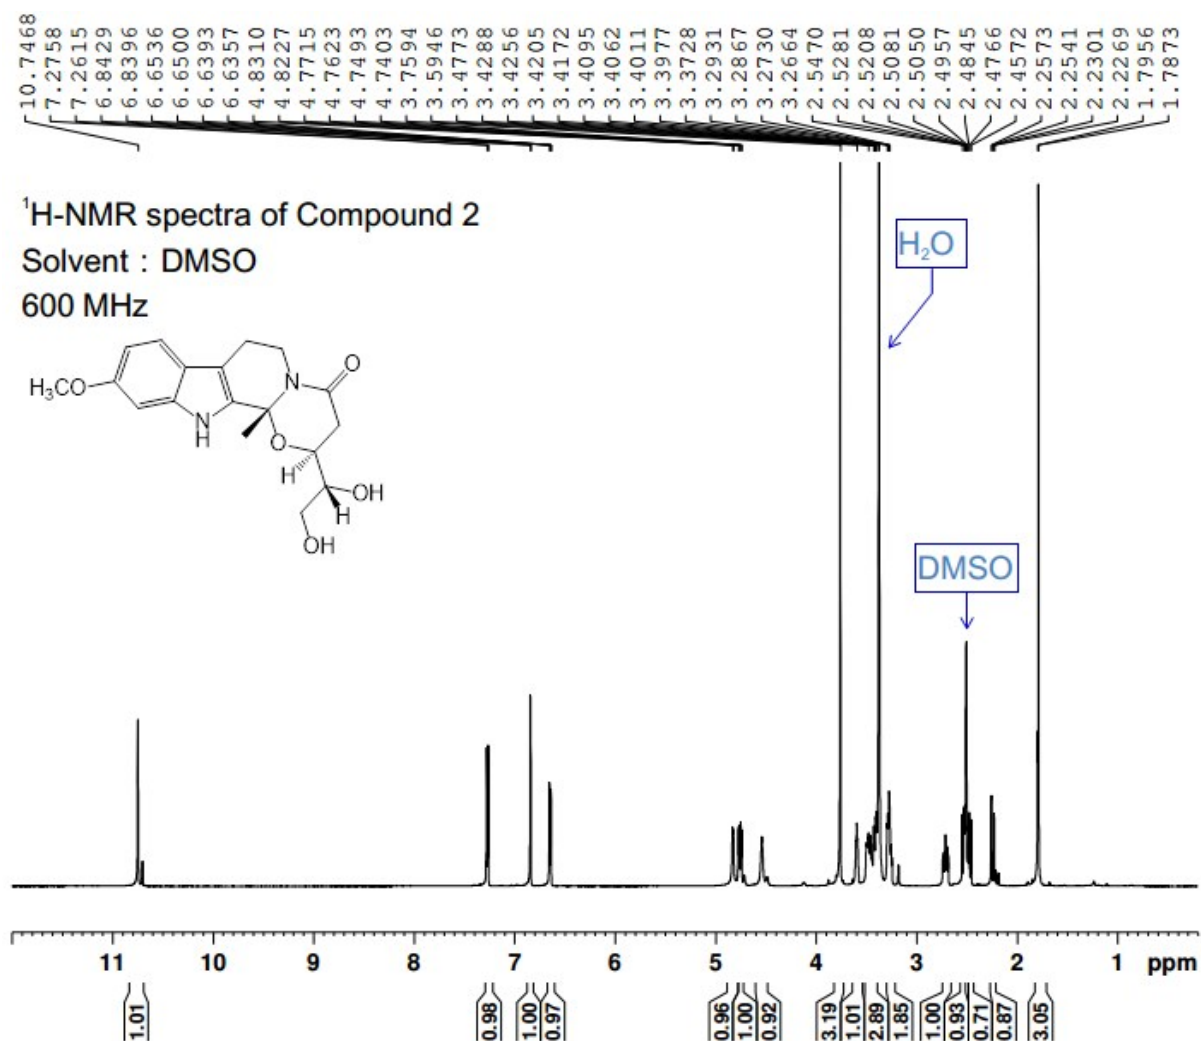



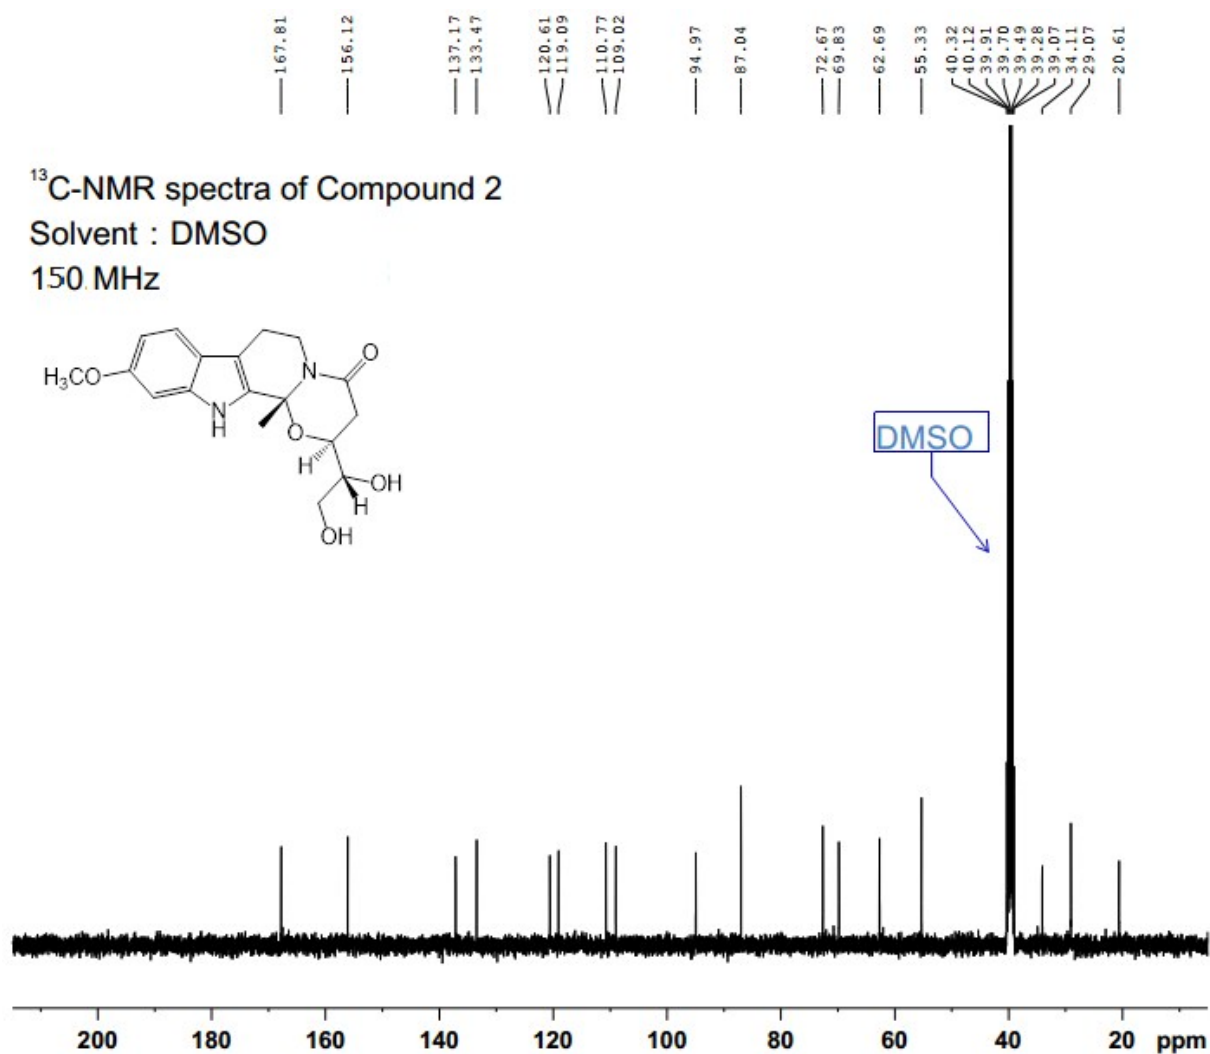

DEPT spectra of Compound 2

Solvent : DMSO

$^1\text{H}$ -NMR 600 MHz

$^{13}\text{C}$ -NMR 150 MHz

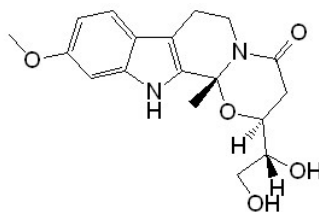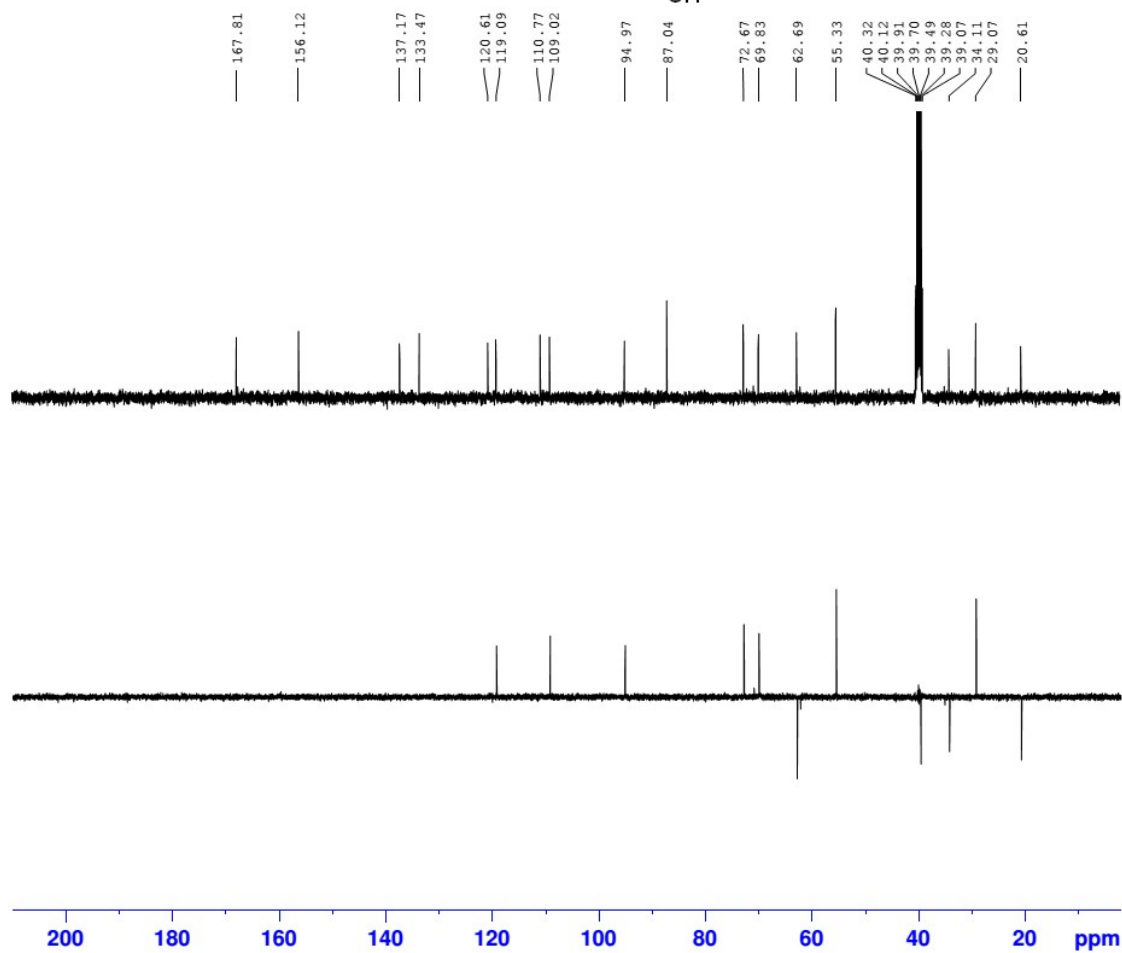

HMQC spectra of Compound 2

Solvent : DMSO

$^1\text{H}$ -NMR 600 MHz

$^{13}\text{C}$ -NMR 150 MHz

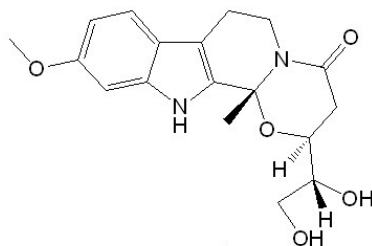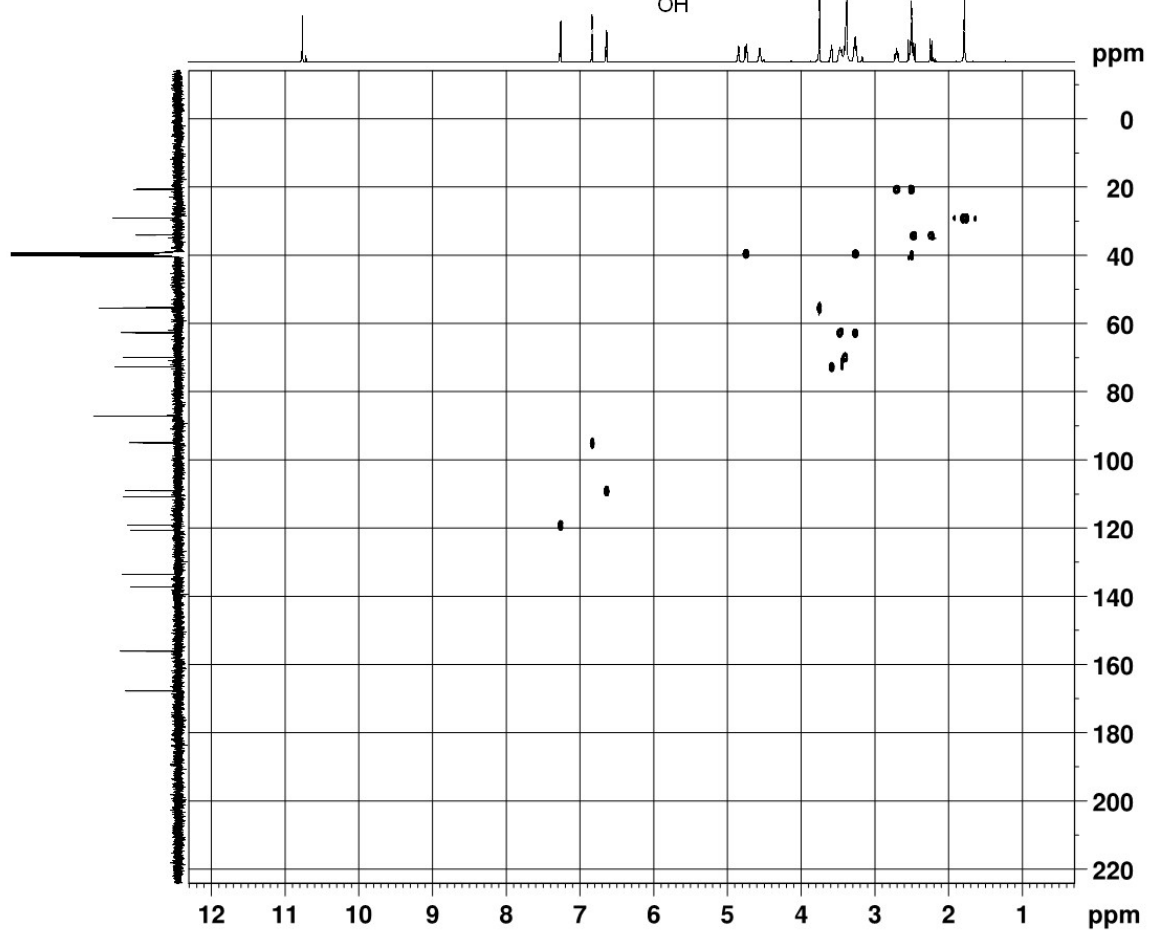

HMBC spectra of Compound 2

Solvent : DMSO

$^1\text{H}$ -NMR 600 MHz

$^{13}\text{C}$ -NMR 150 MHz

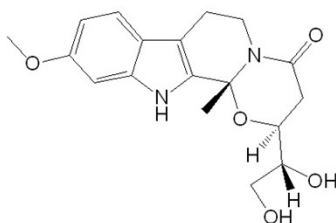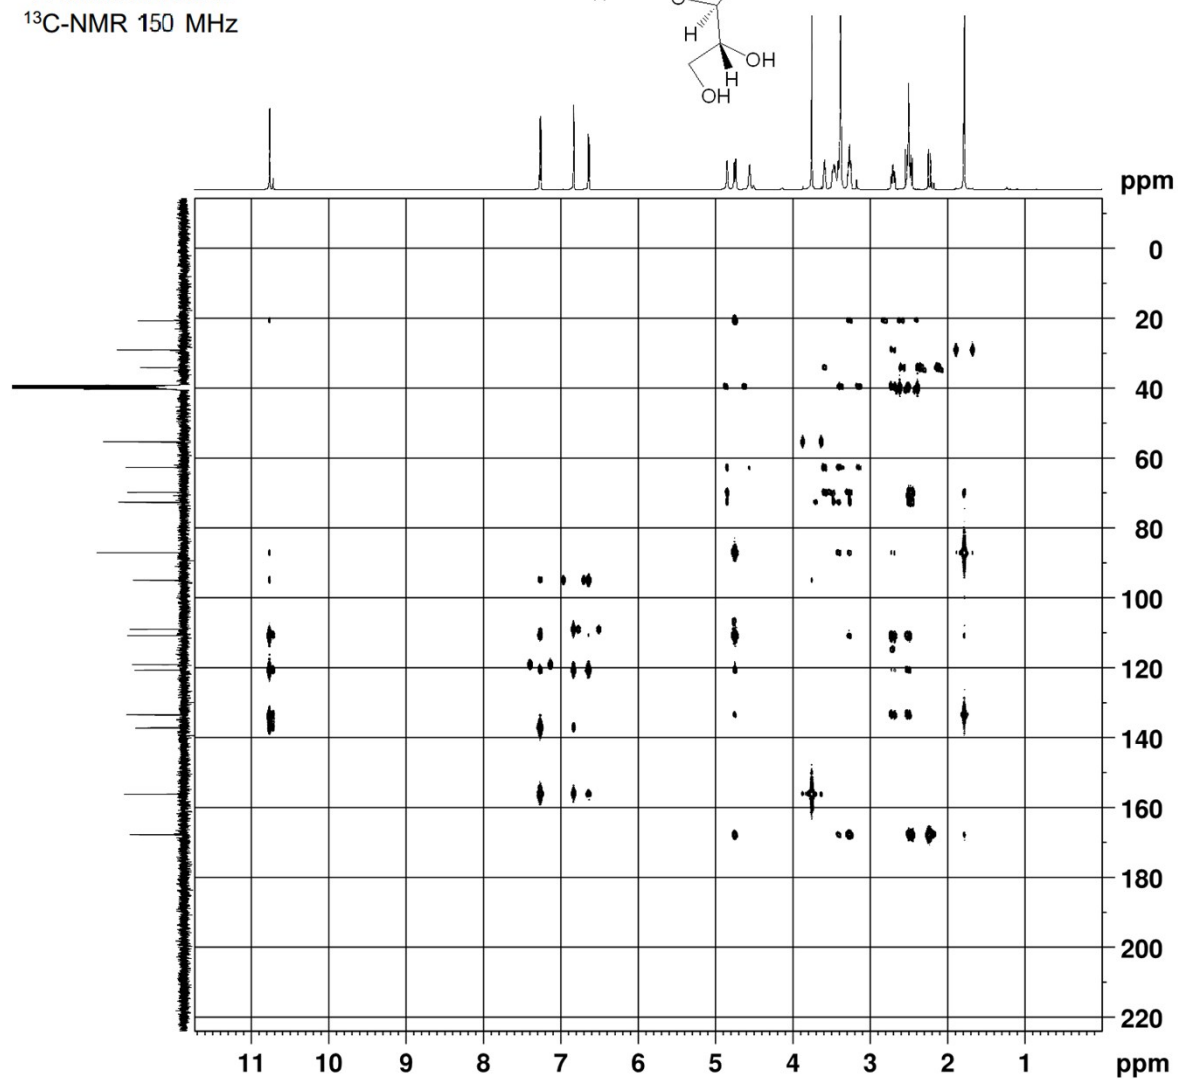

$^1\text{H}$ - $^1\text{H}$  COSY spectra of Compound 2  
Solvent : DMSO  
600 MHz

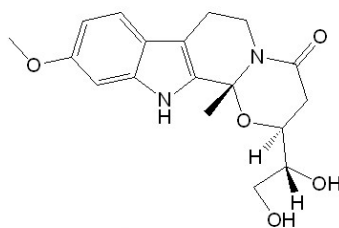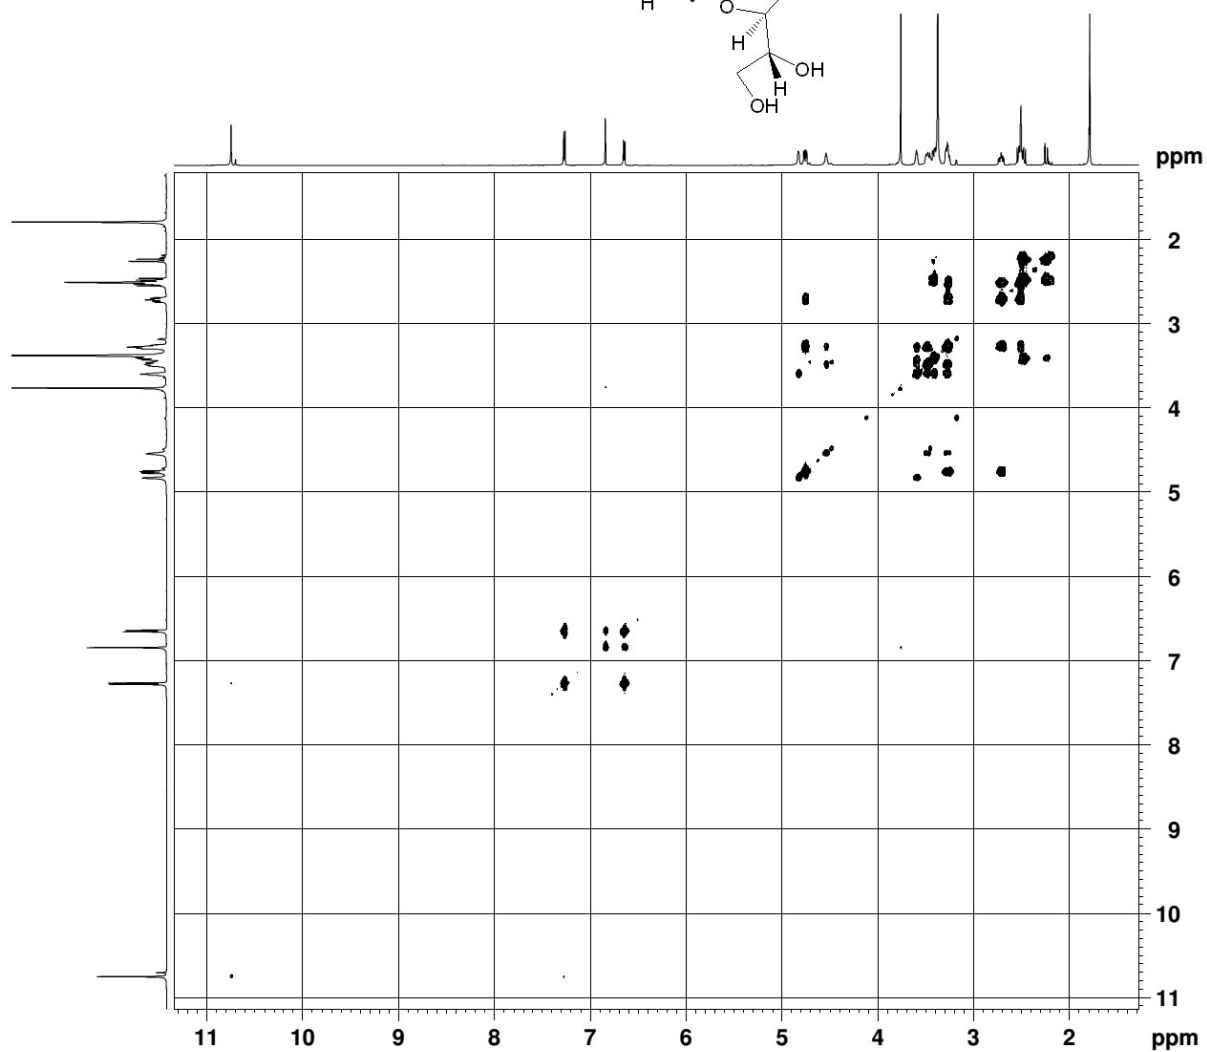

NOESY spectra of Compound 2  
Solvent : DMSO  
600 MHz

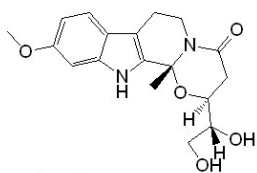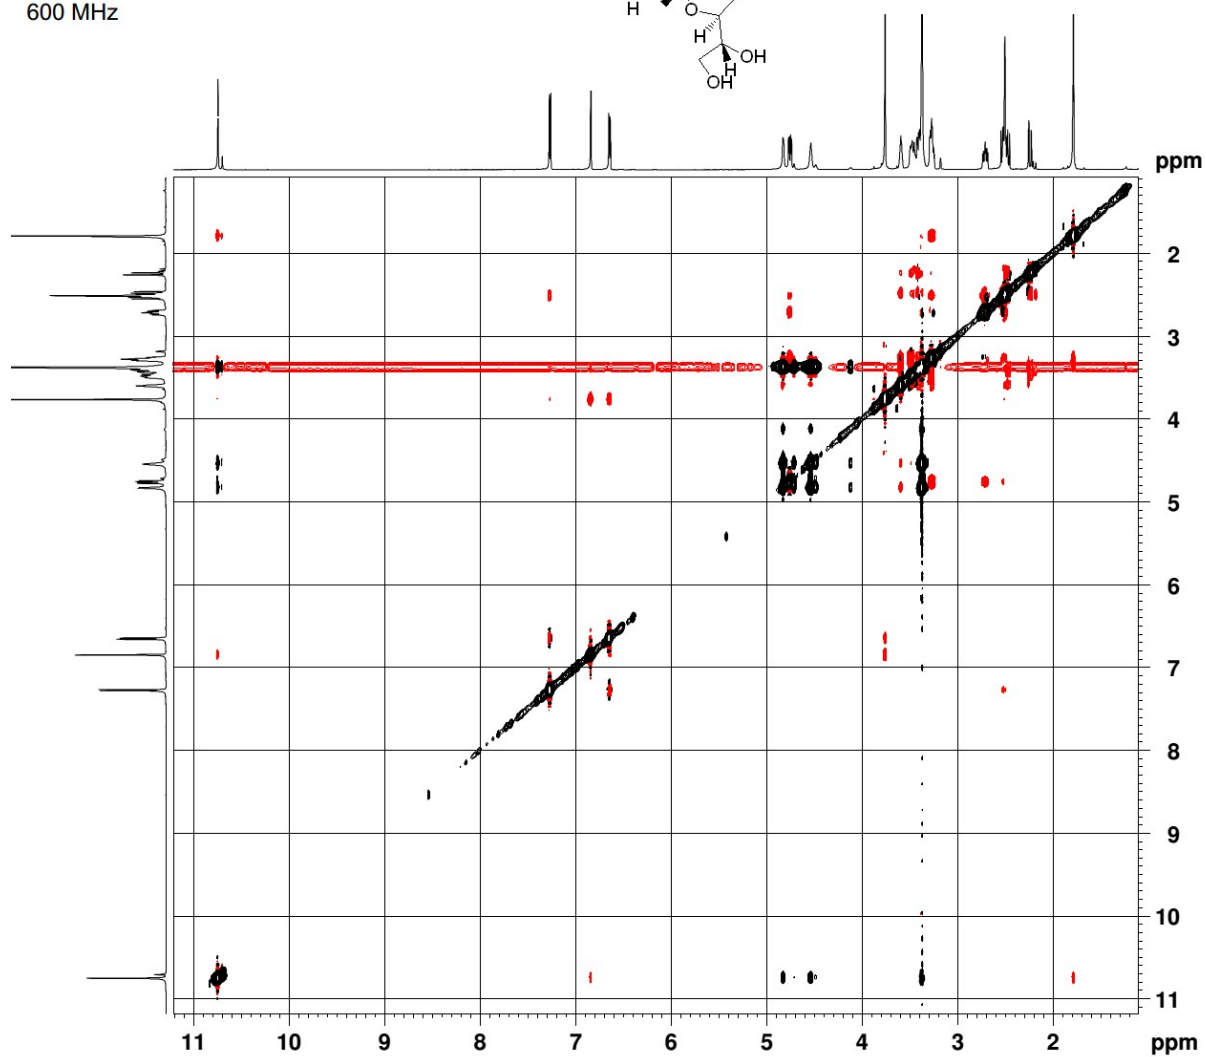

### 1.3 NMR spectrum of compound 3

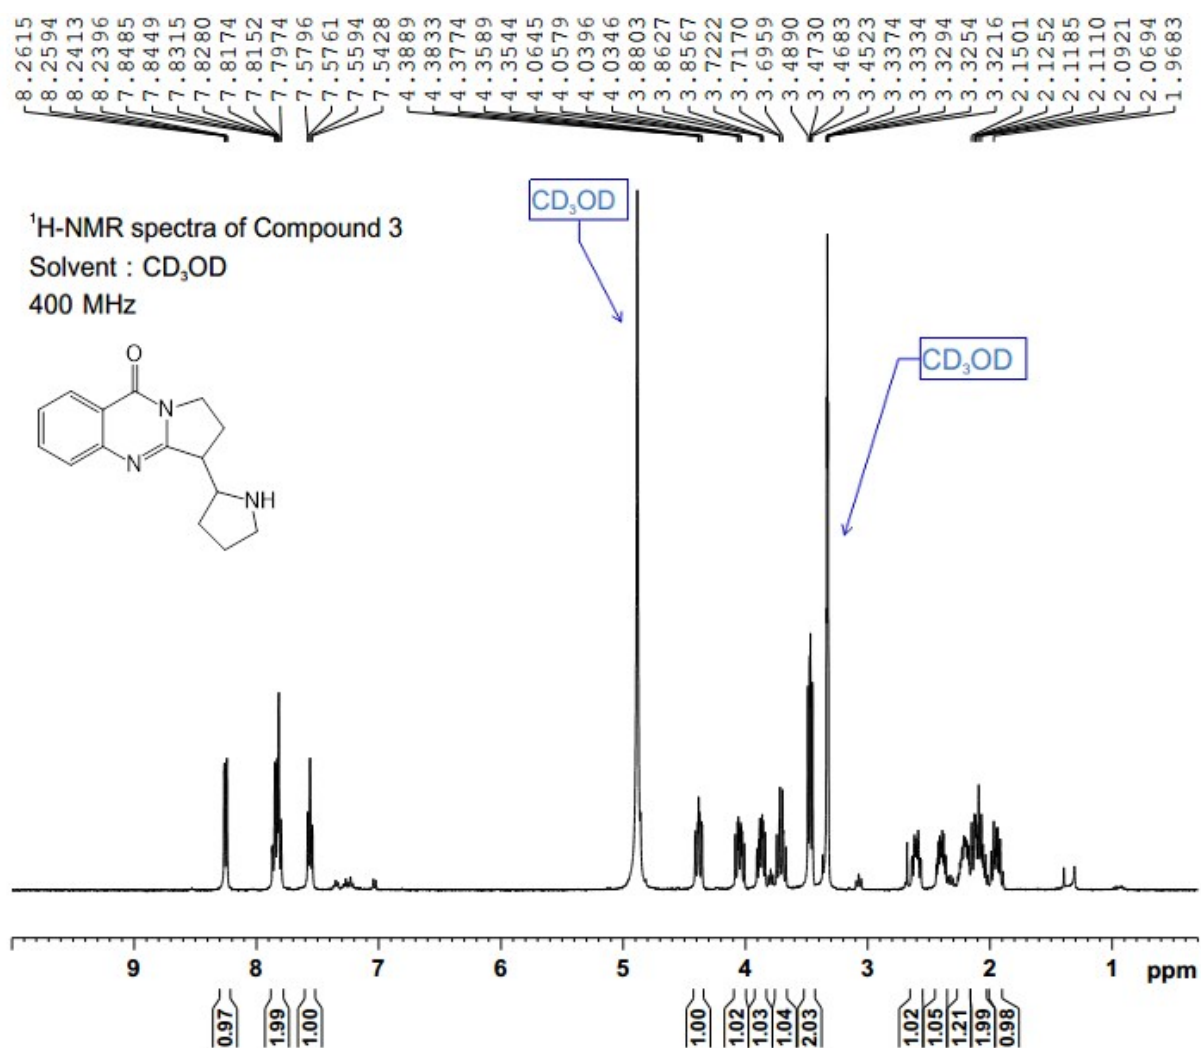

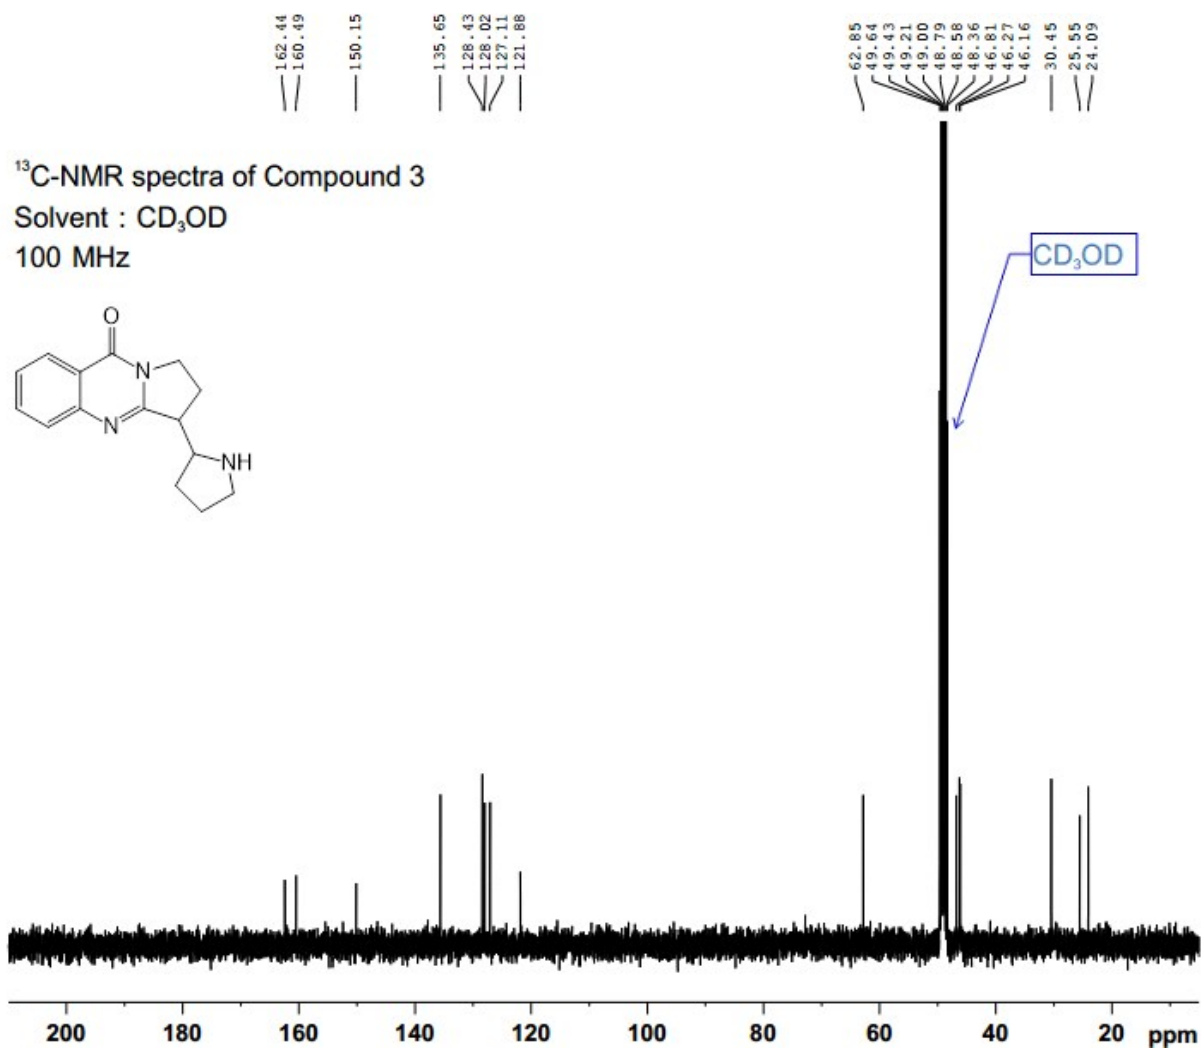



DEPT spectra of Compound 3

Solvent: CD<sub>3</sub>OD

<sup>13</sup>C-NMR 150 MHz

<sup>1</sup>H-NMR 600 MHz

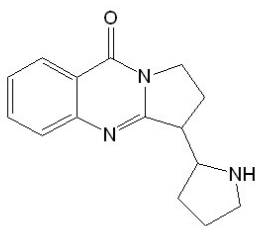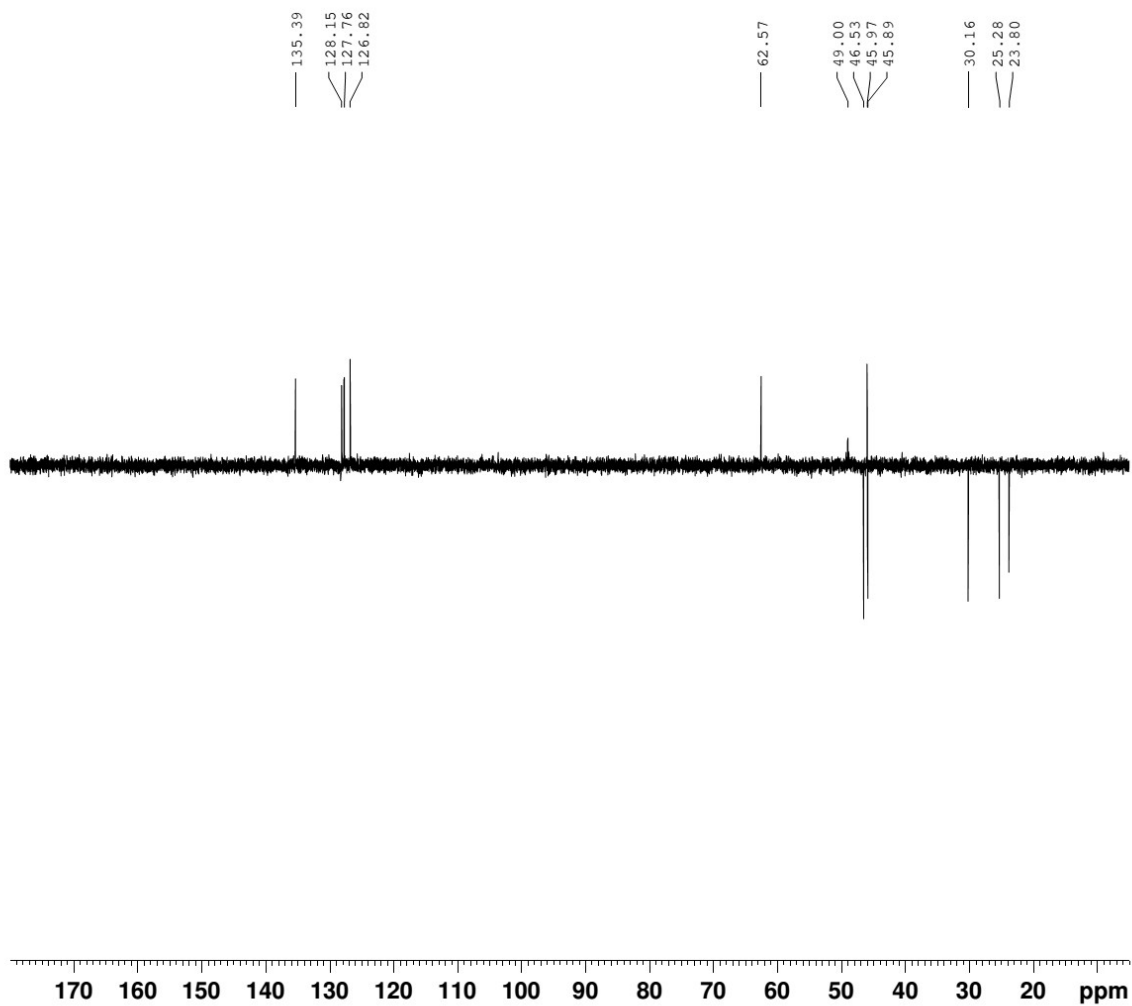

HMQC spectra of Compound 3

Solvent: CD<sub>3</sub>OD

<sup>13</sup>C-NMR 100 MHz

<sup>1</sup>H-NMR 400 MHz

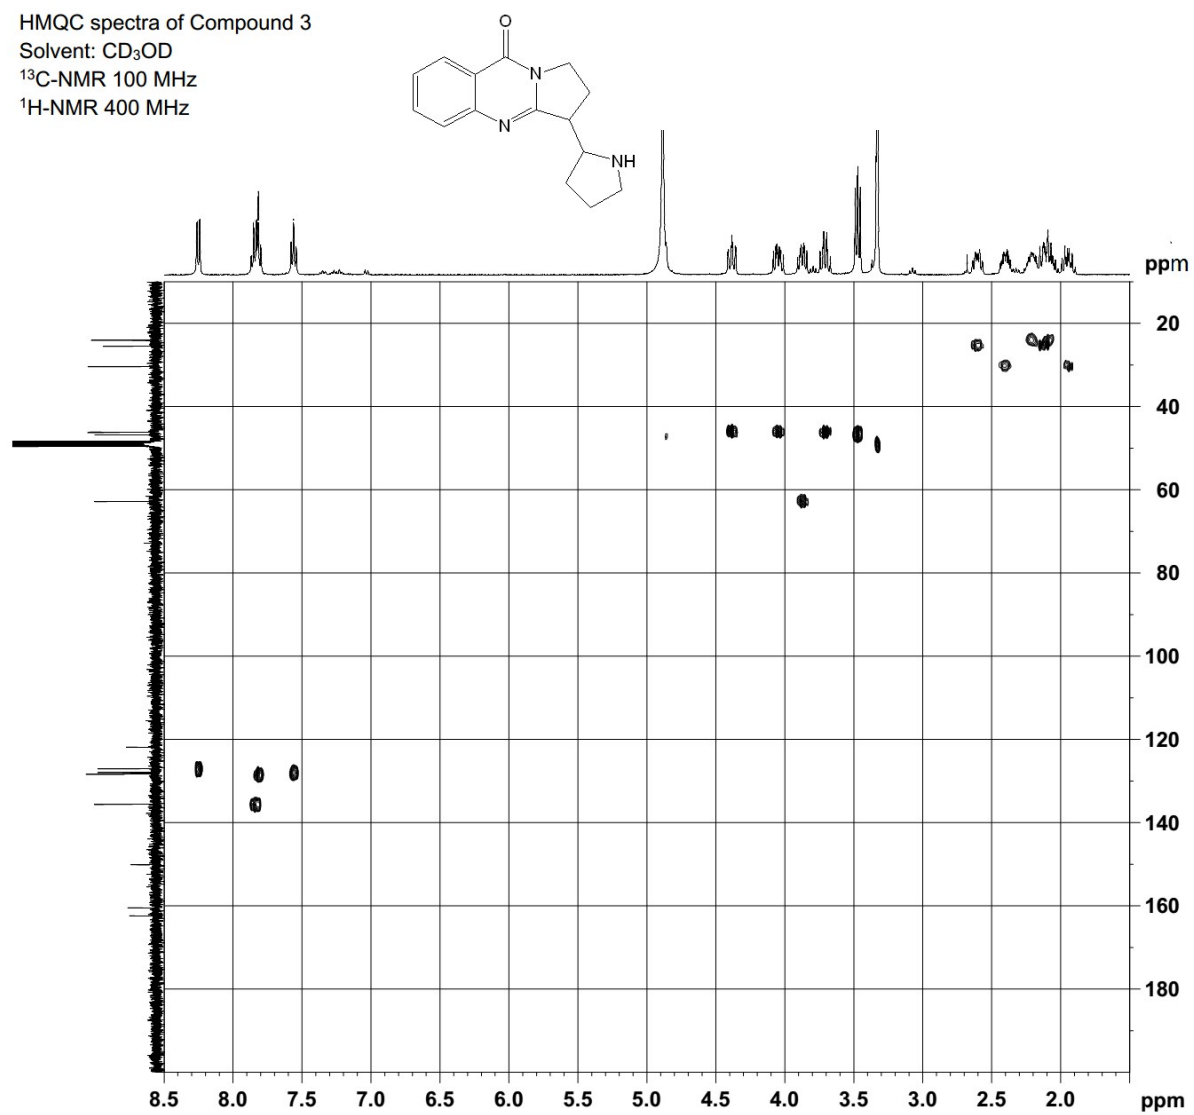

HMBC spectra of Compound 3

Solvent: CD<sub>3</sub>OD

<sup>13</sup>C-NMR 100 MHz

<sup>1</sup>H-NMR 400 MHz

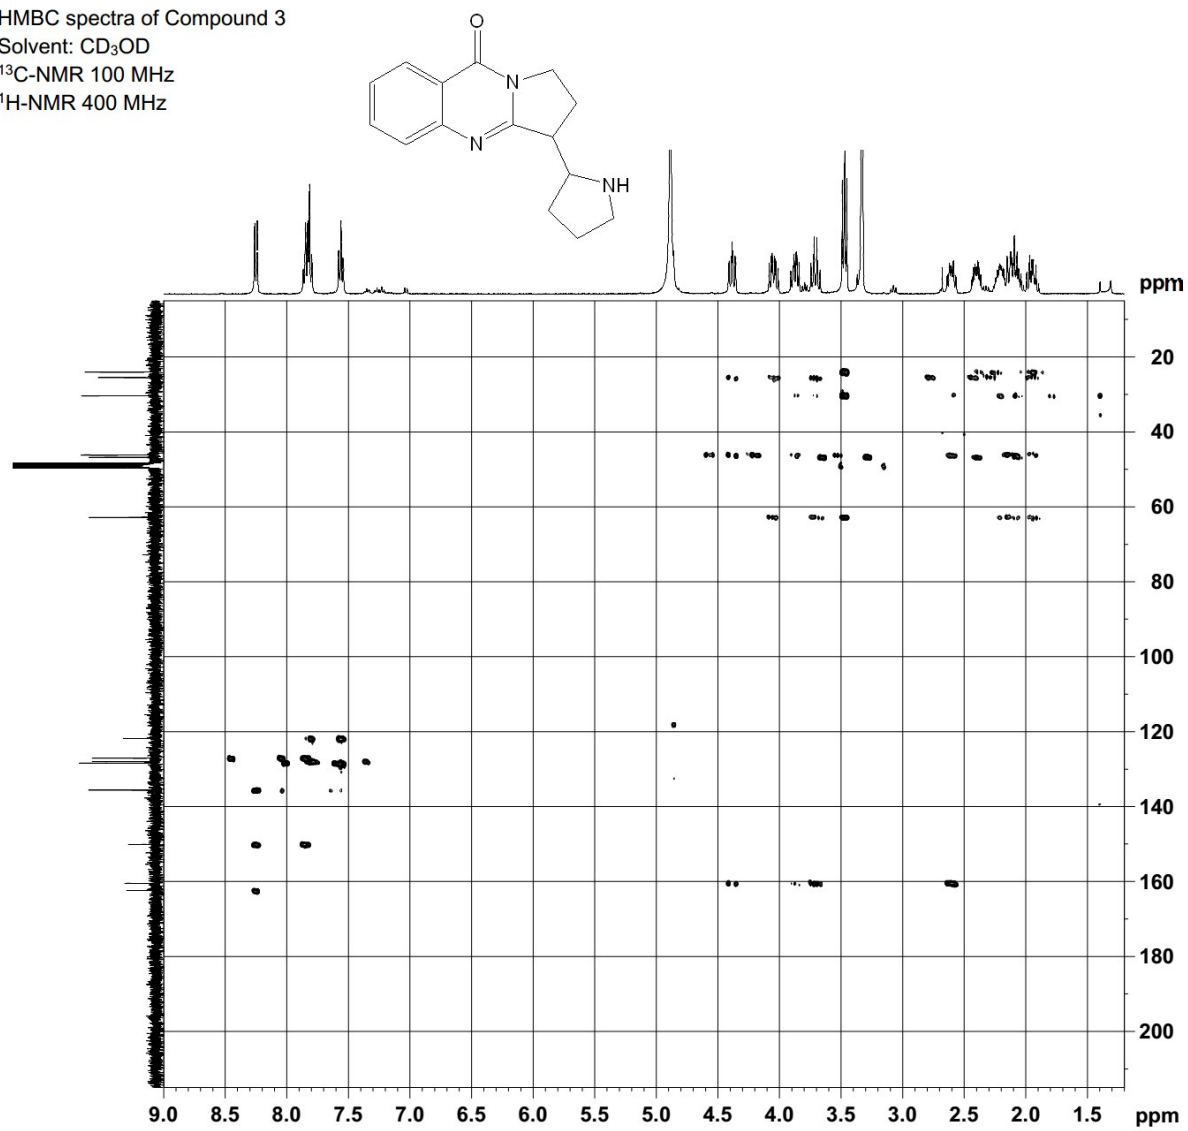

<sup>1</sup>H-<sup>1</sup>H COSY spectra of Compound 3  
Solvent: CD<sub>3</sub>OD  
400 MHz

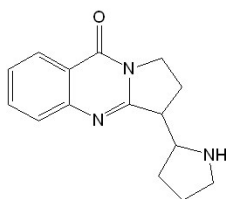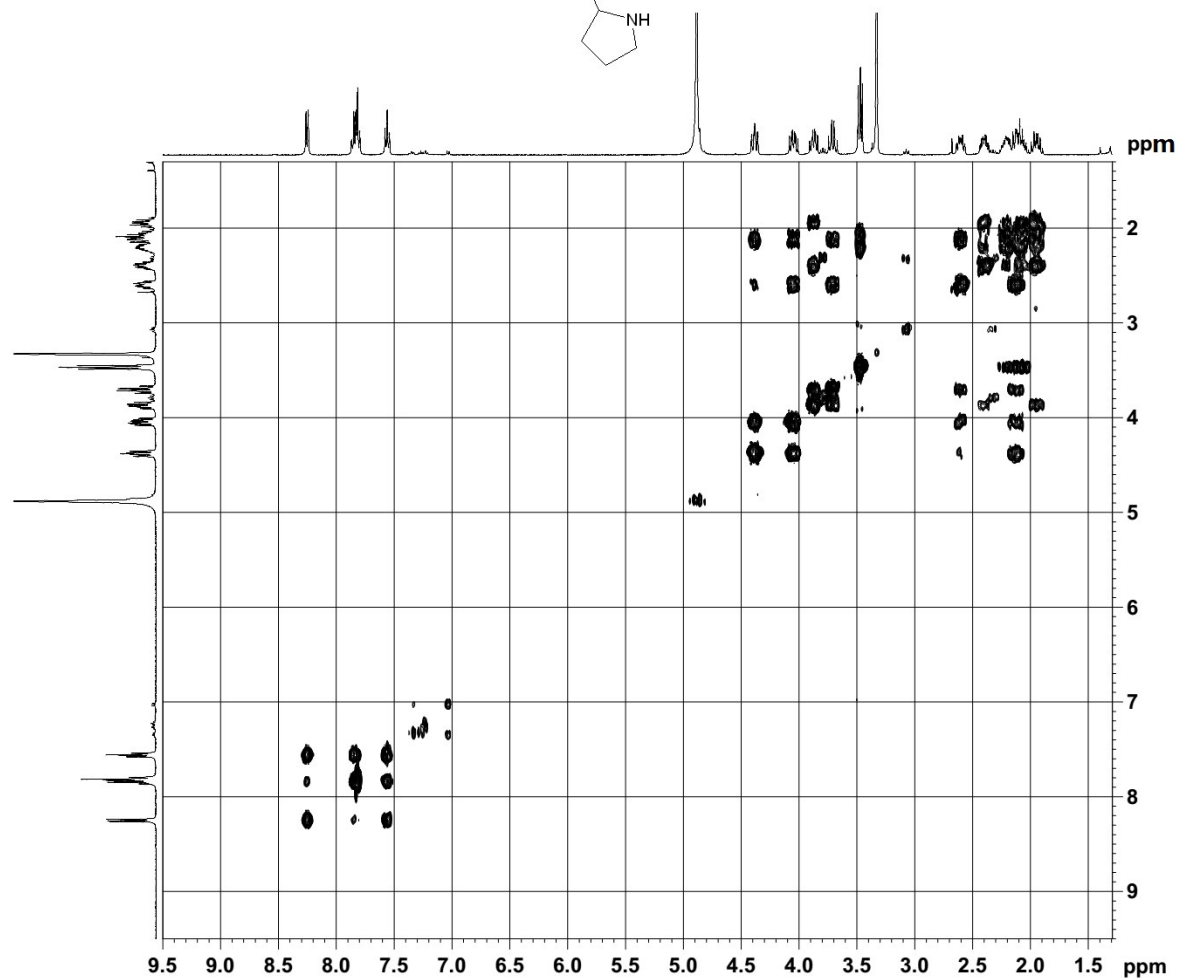

NOESY spectra of Compound 3  
Solvent: CD<sub>3</sub>OD  
600 MHz

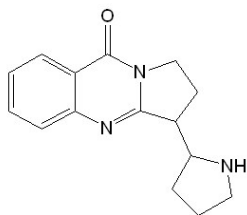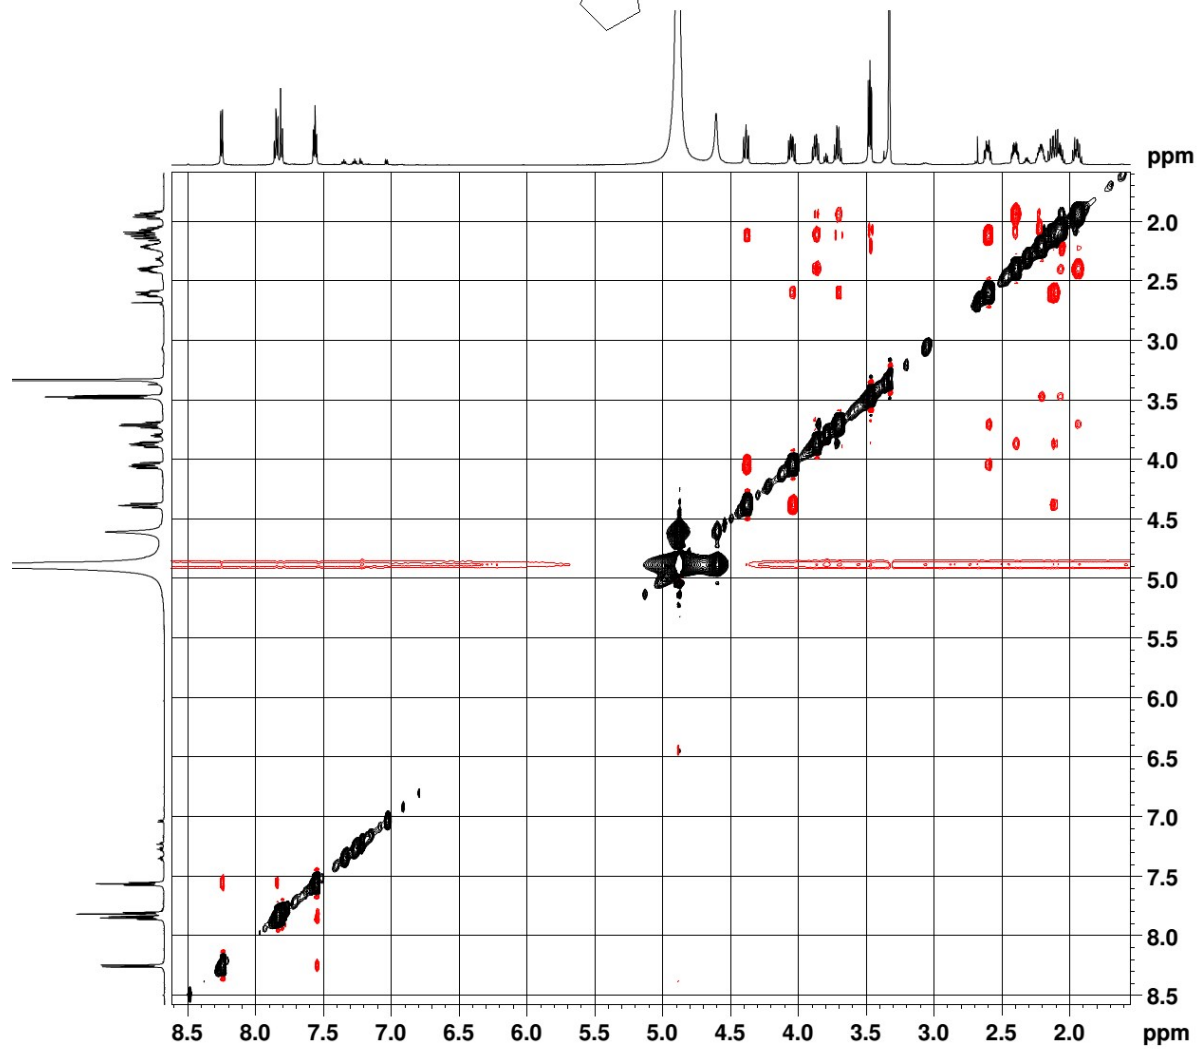

# 1.4 NMR spectrum of compound 4

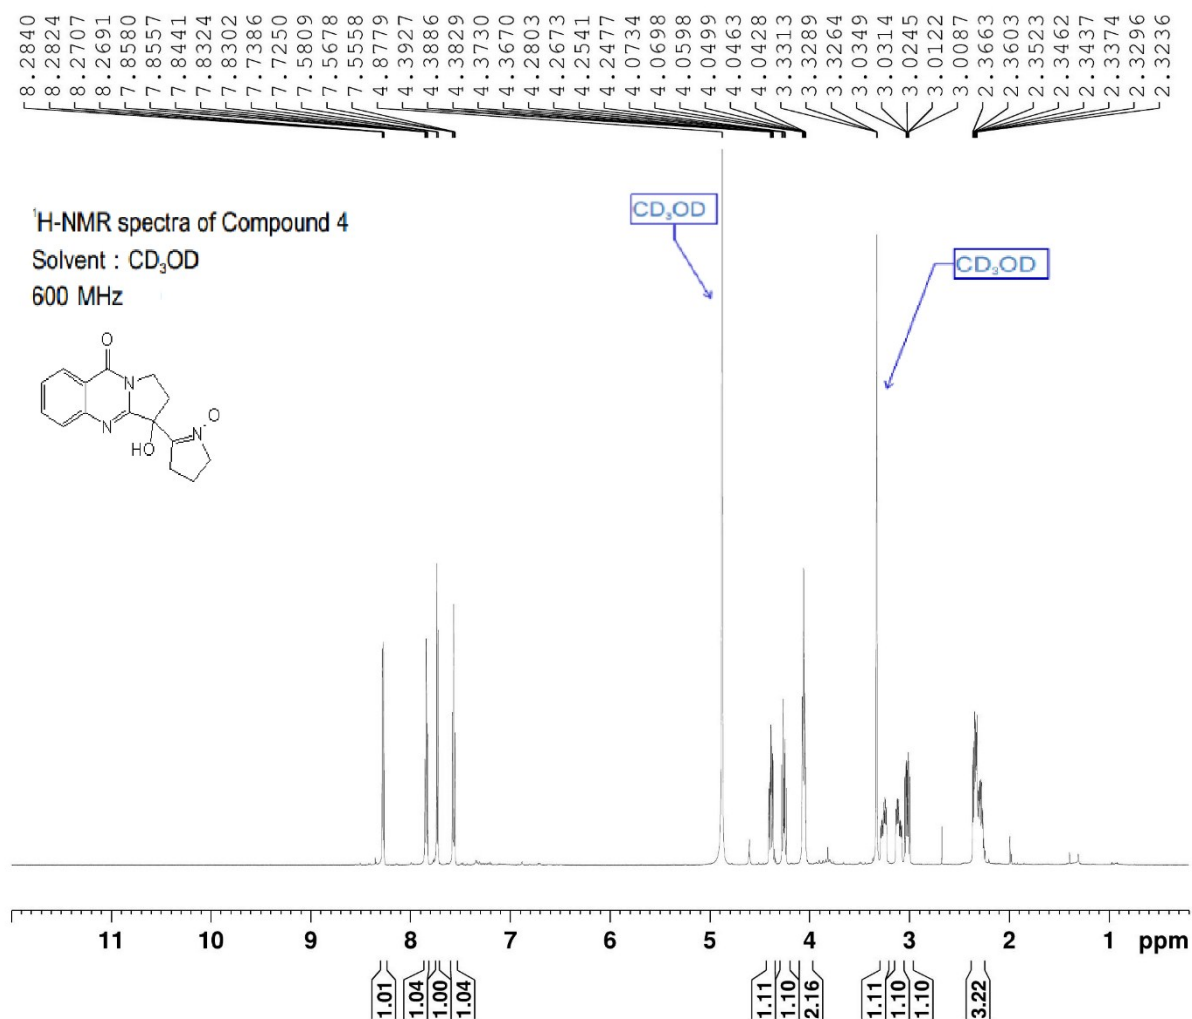

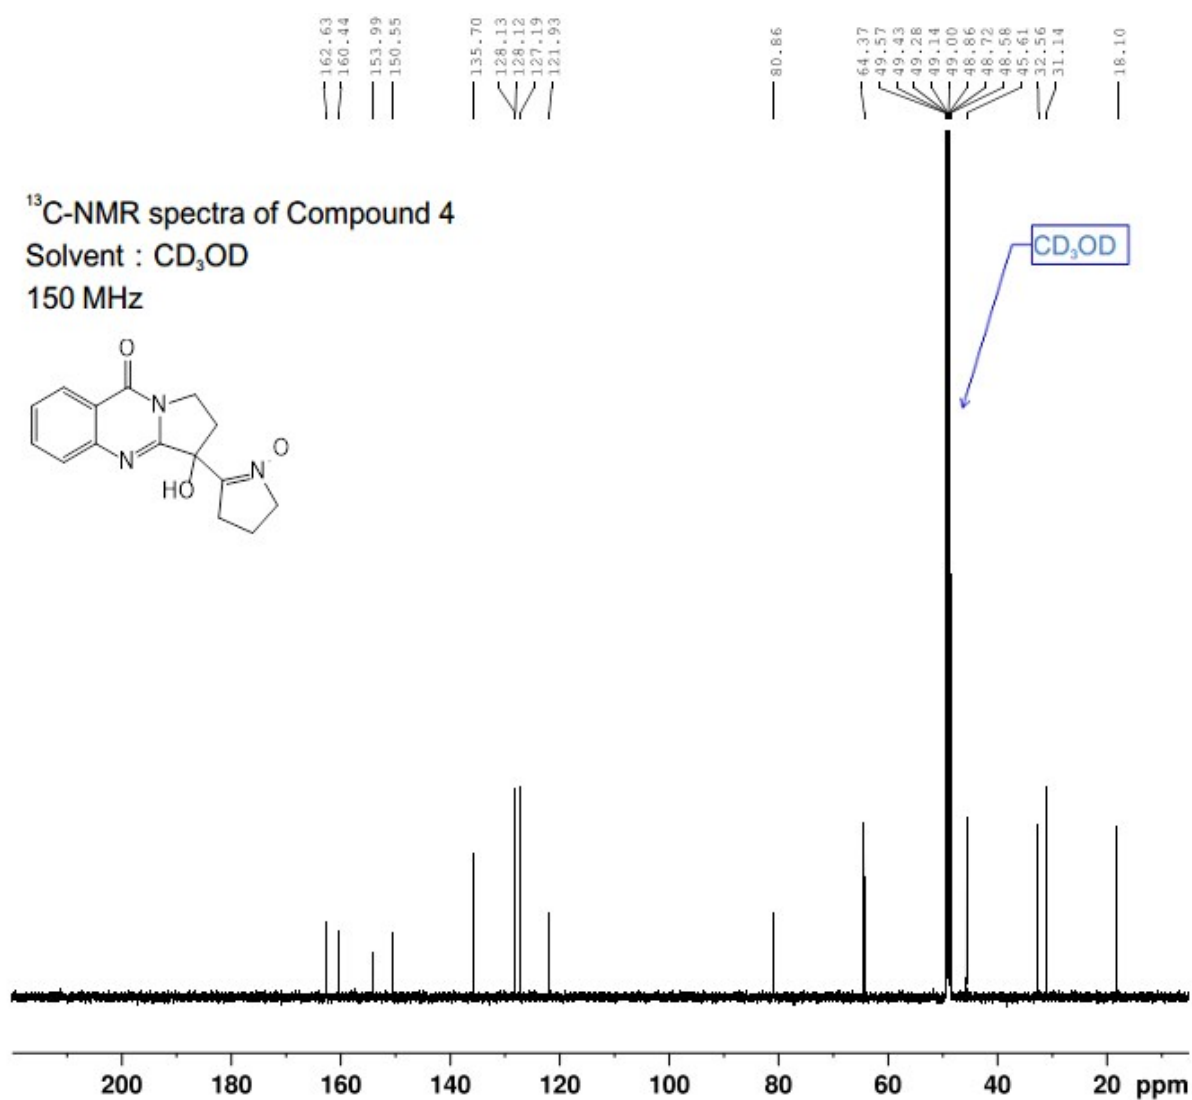

HMQC spectra of Compound 4

Solvent : CD<sub>3</sub>OD

<sup>13</sup>C-NMR 150 MHz

<sup>1</sup>H-NMR 600 MHz

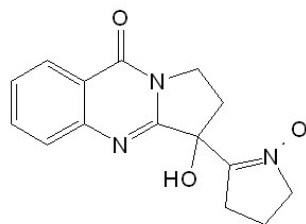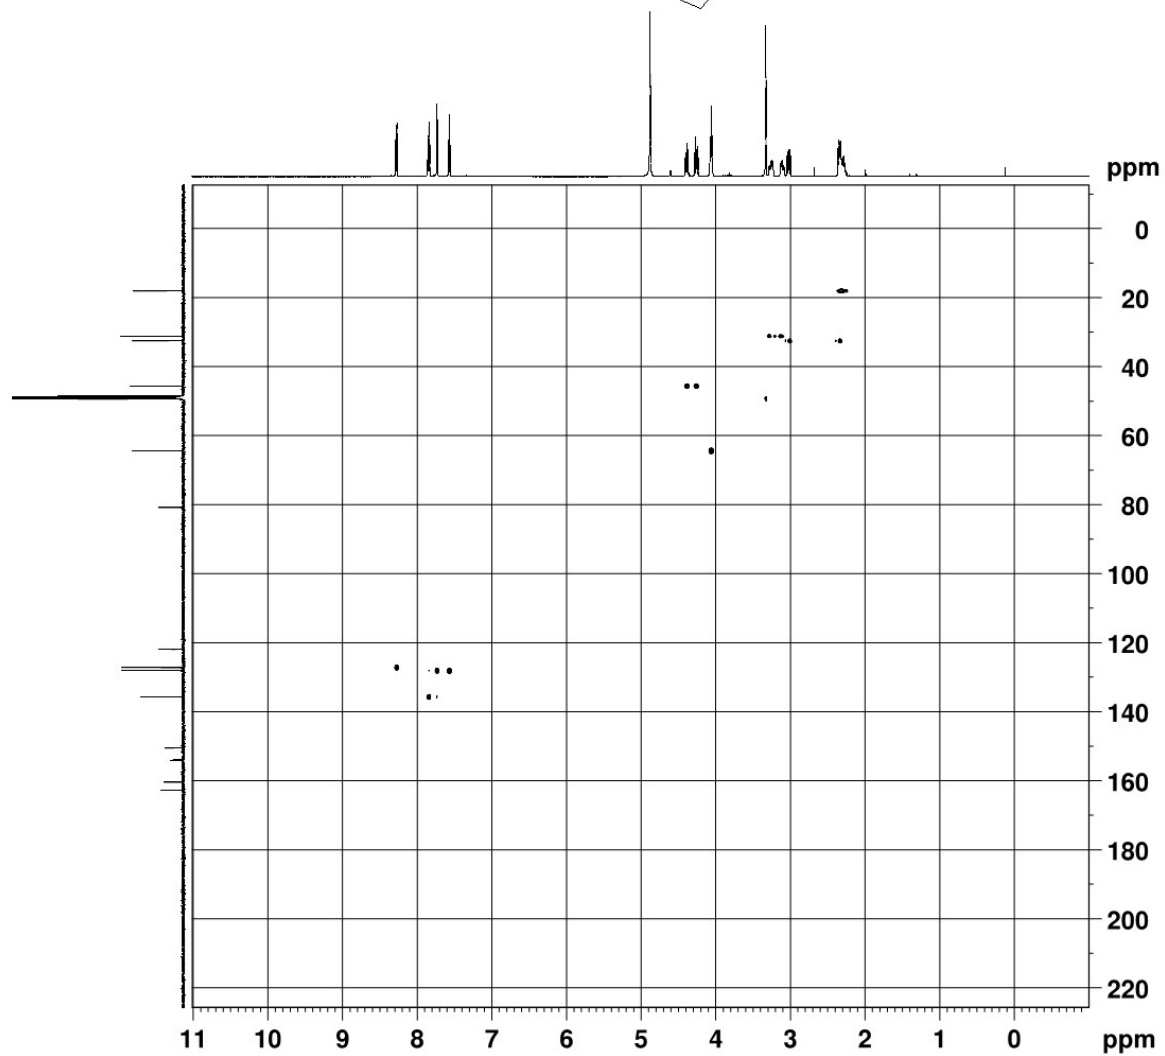



HMBC spectra of Compound 4

Solvent : CD<sub>3</sub>OD

<sup>13</sup>C-NMR 150 MHz

<sup>1</sup>H-NMR 600 MHz

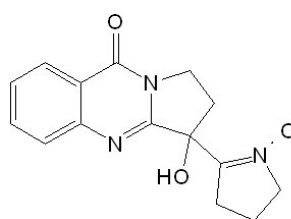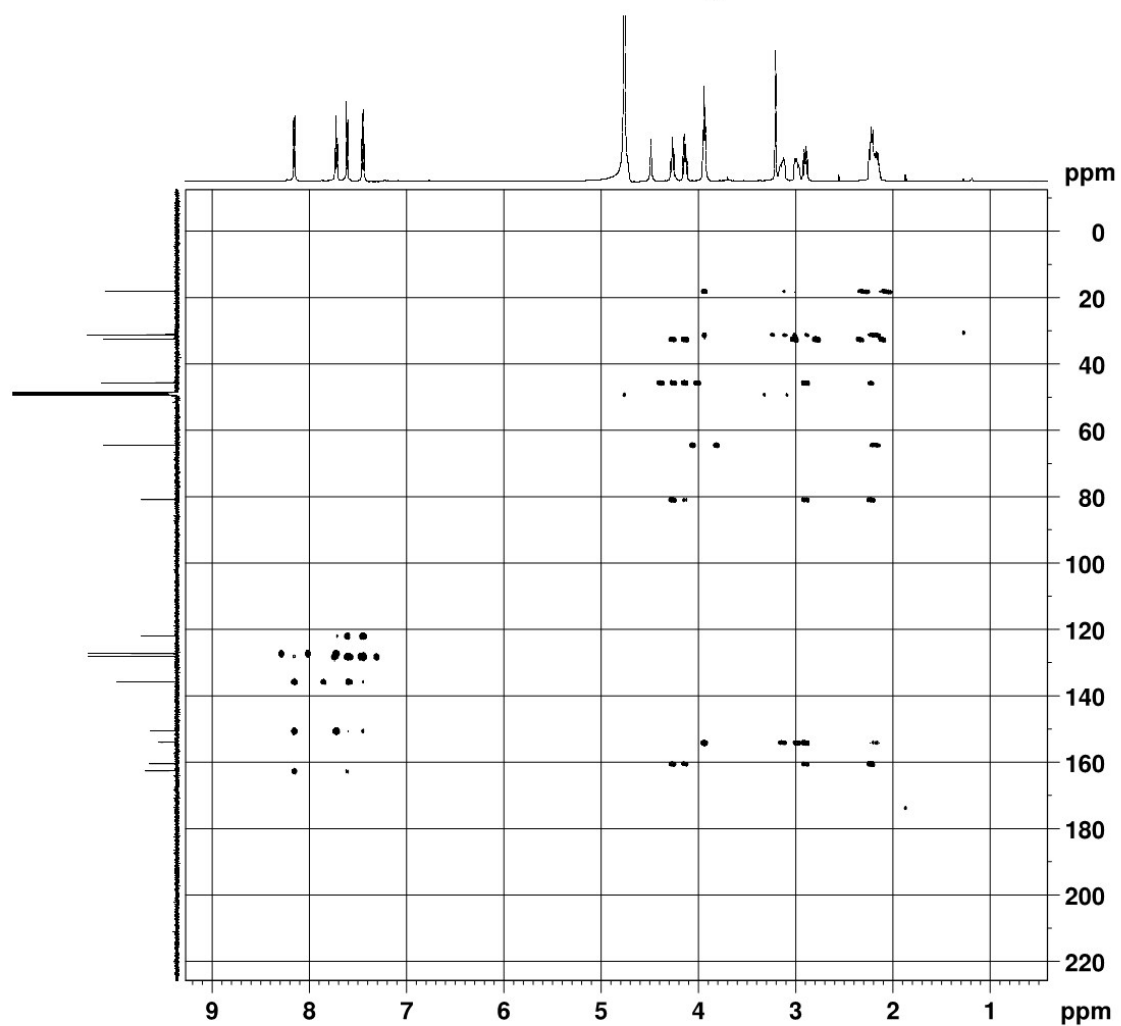

$^1\text{H}$ - $^1\text{H}$  COSY spectra of Compound 4

Solvent :  $\text{CD}_3\text{OD}$

600 MHz

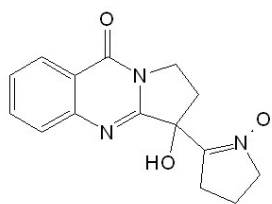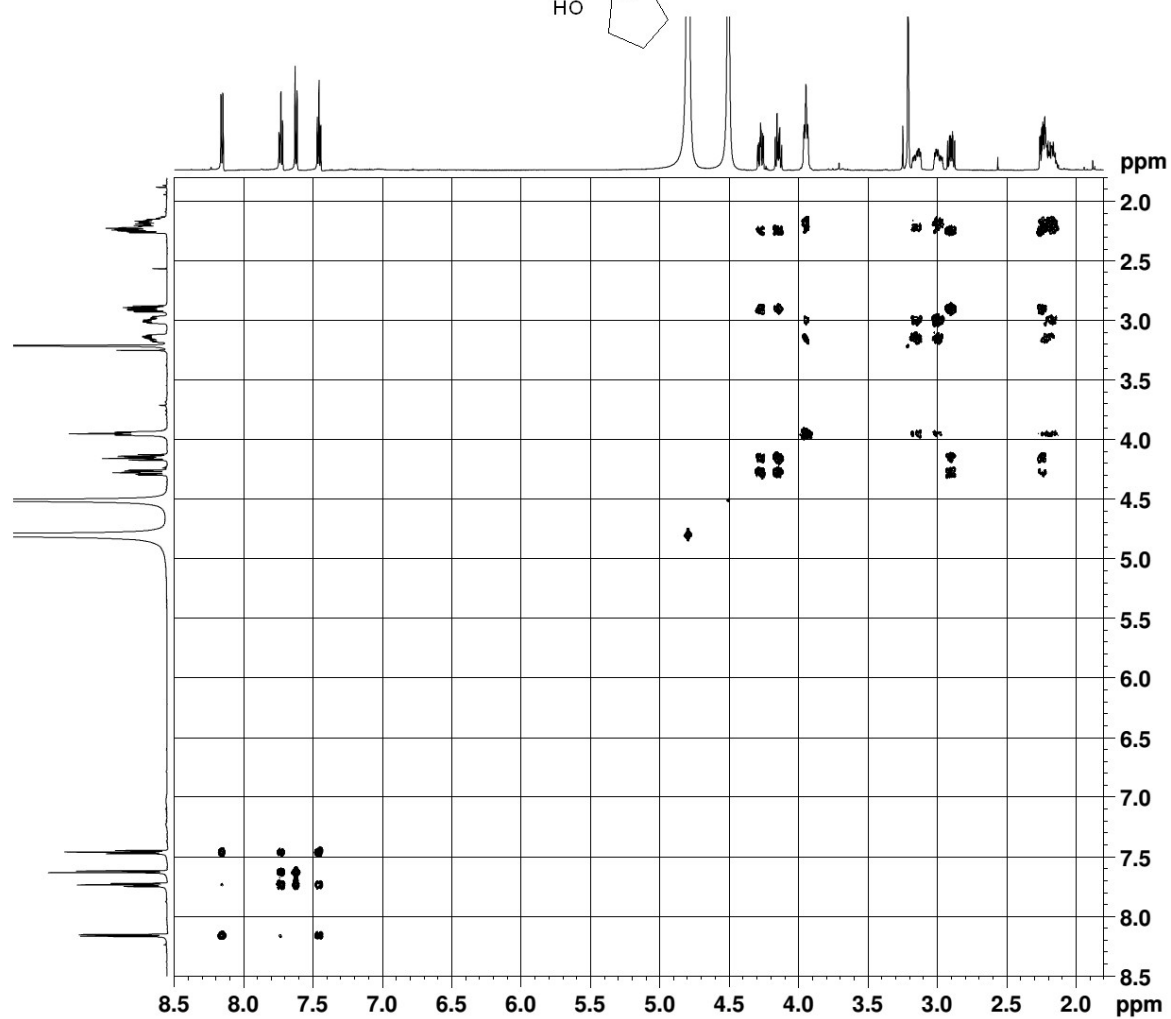

NOESY spectra of Compound 4  
Solvent : CD<sub>3</sub>OD  
600 MHz

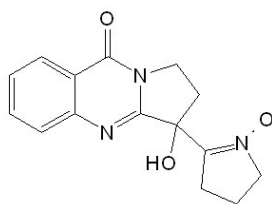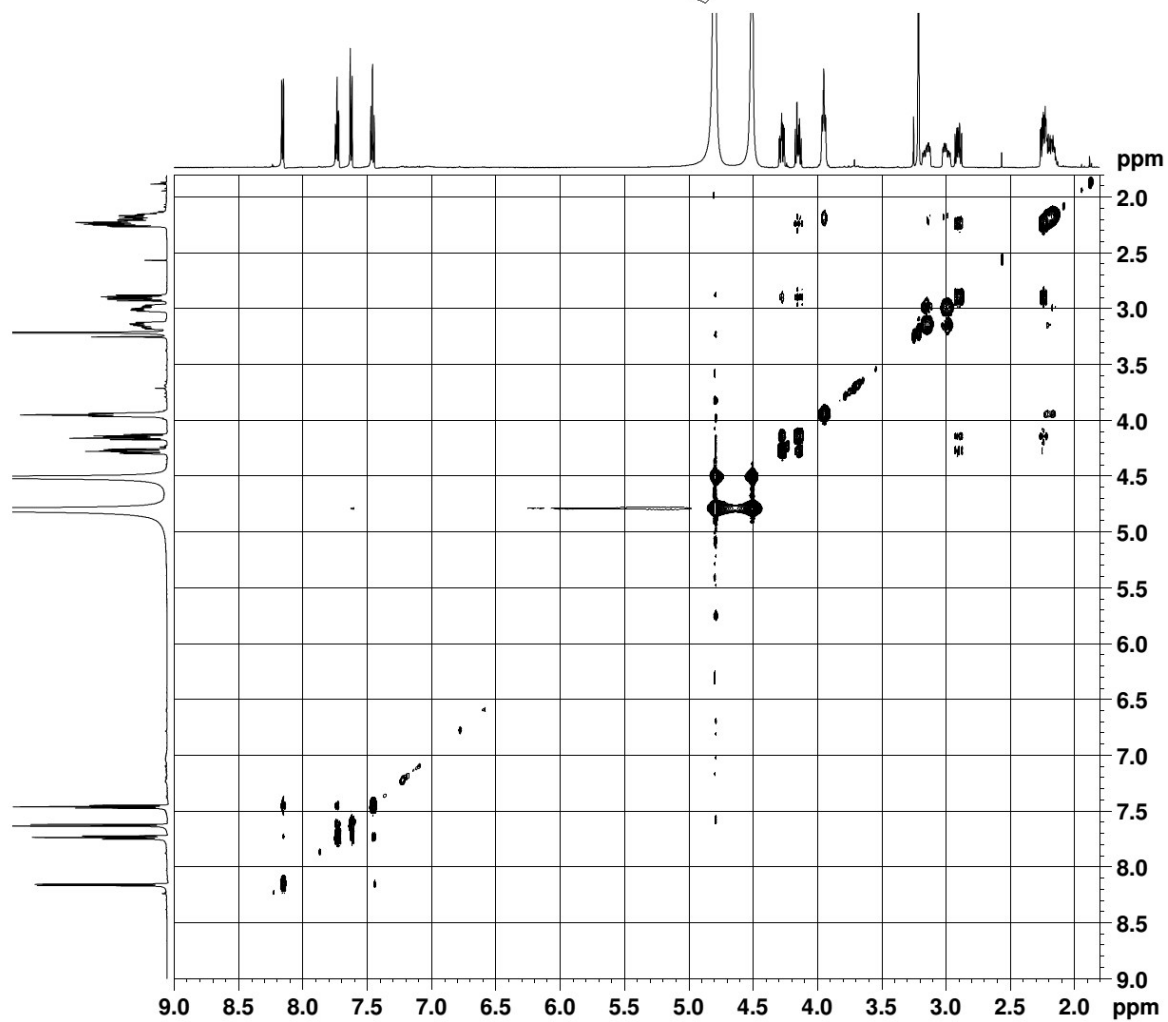

# 1.5 NMR spectrum of compound 5

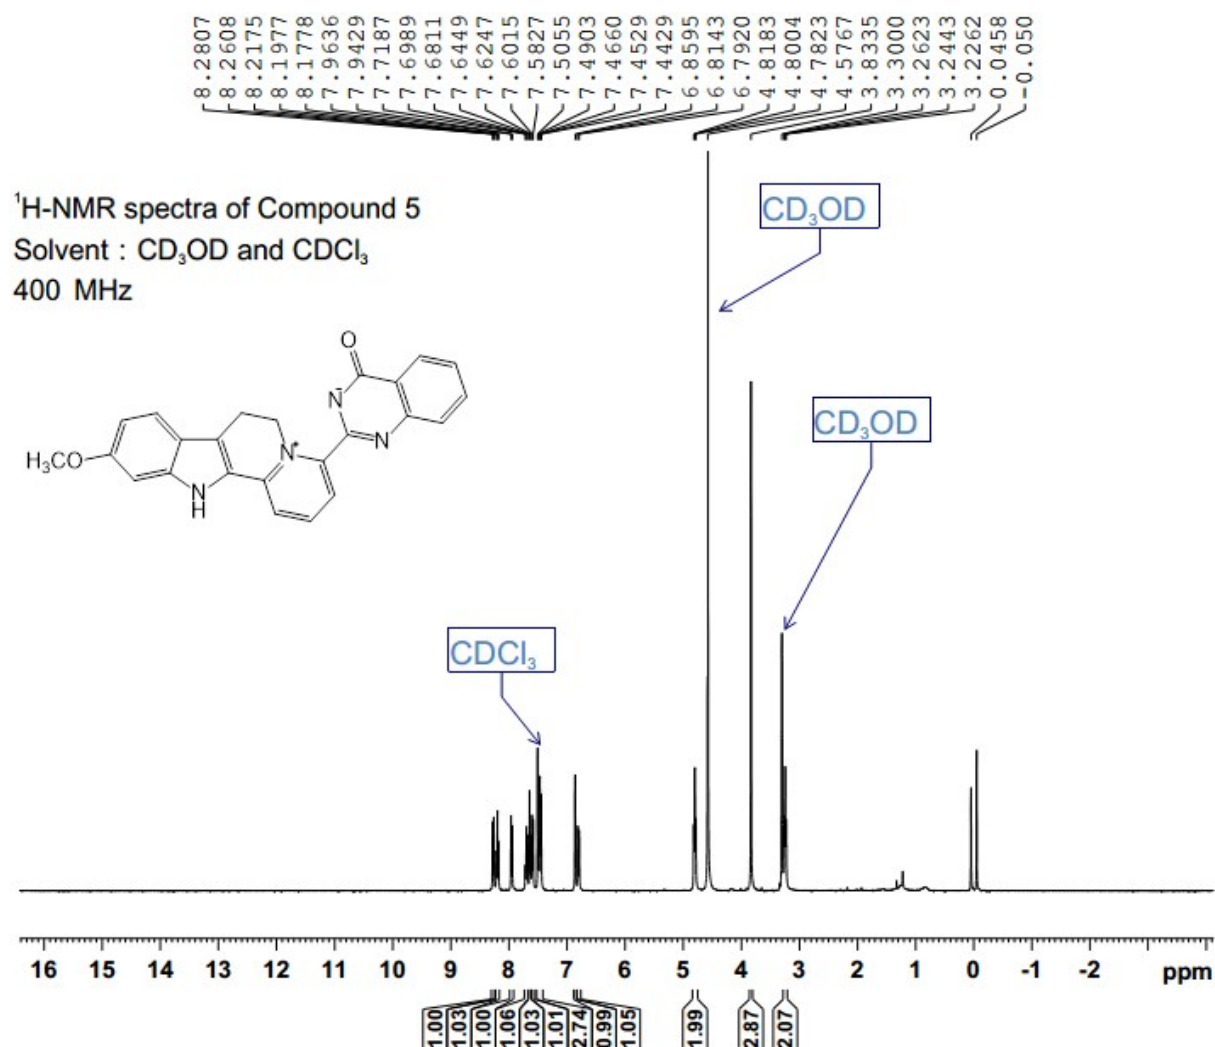

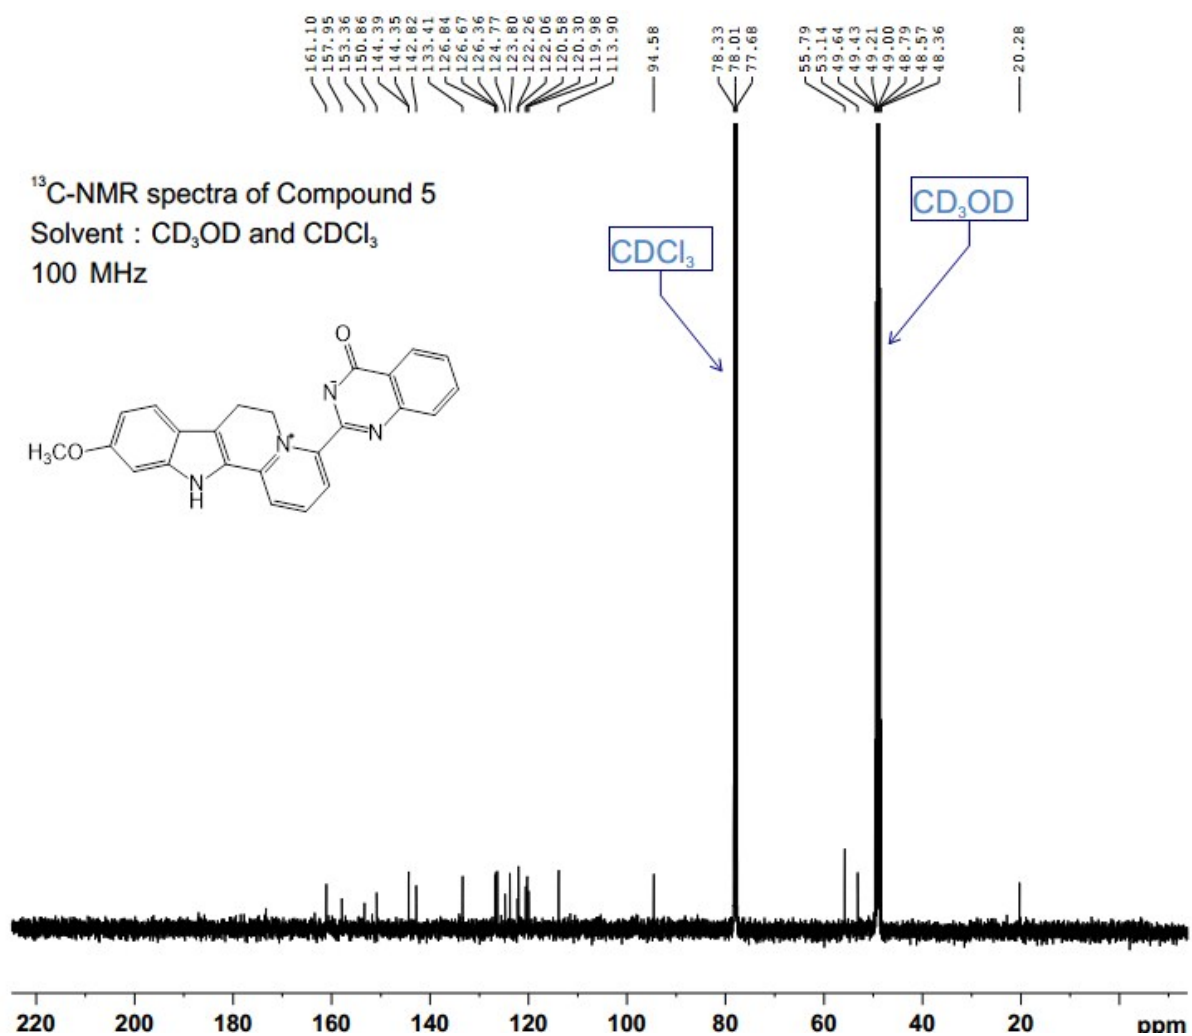

DEPT spectra of Compound 5  
 Solvent : CD<sub>3</sub>OD and CDCl<sub>3</sub>  
<sup>13</sup>C-NMR 100 MHz  
<sup>1</sup>H-NMR 400 MHz

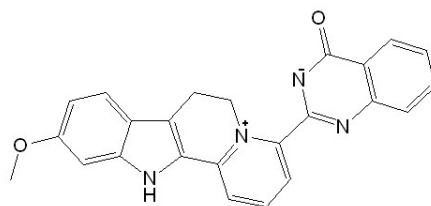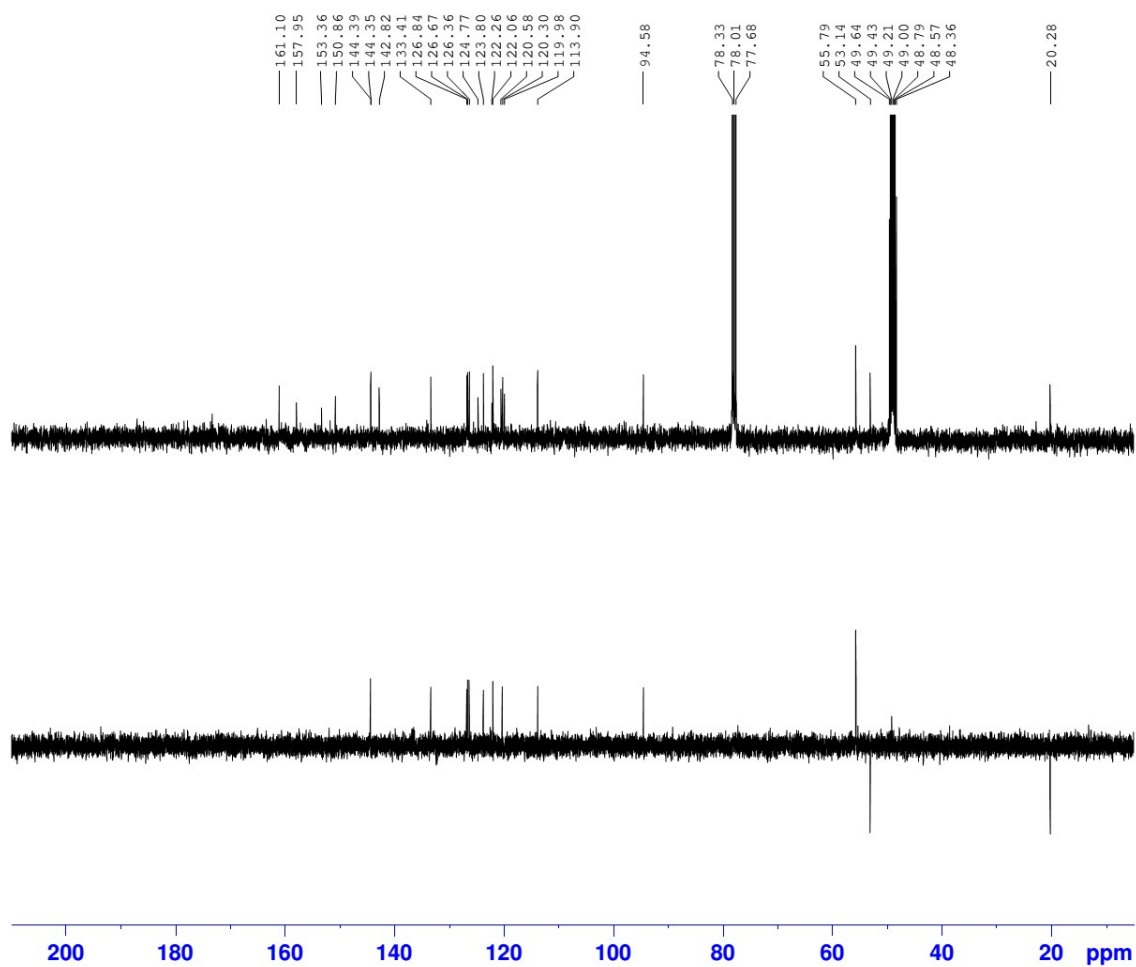

HMQC spectra of Compound 5

Solvent : CD<sub>3</sub>OD and CDCl<sub>3</sub>

<sup>13</sup>C-NMR 100 MHz

<sup>1</sup>H-NMR 400 MHz

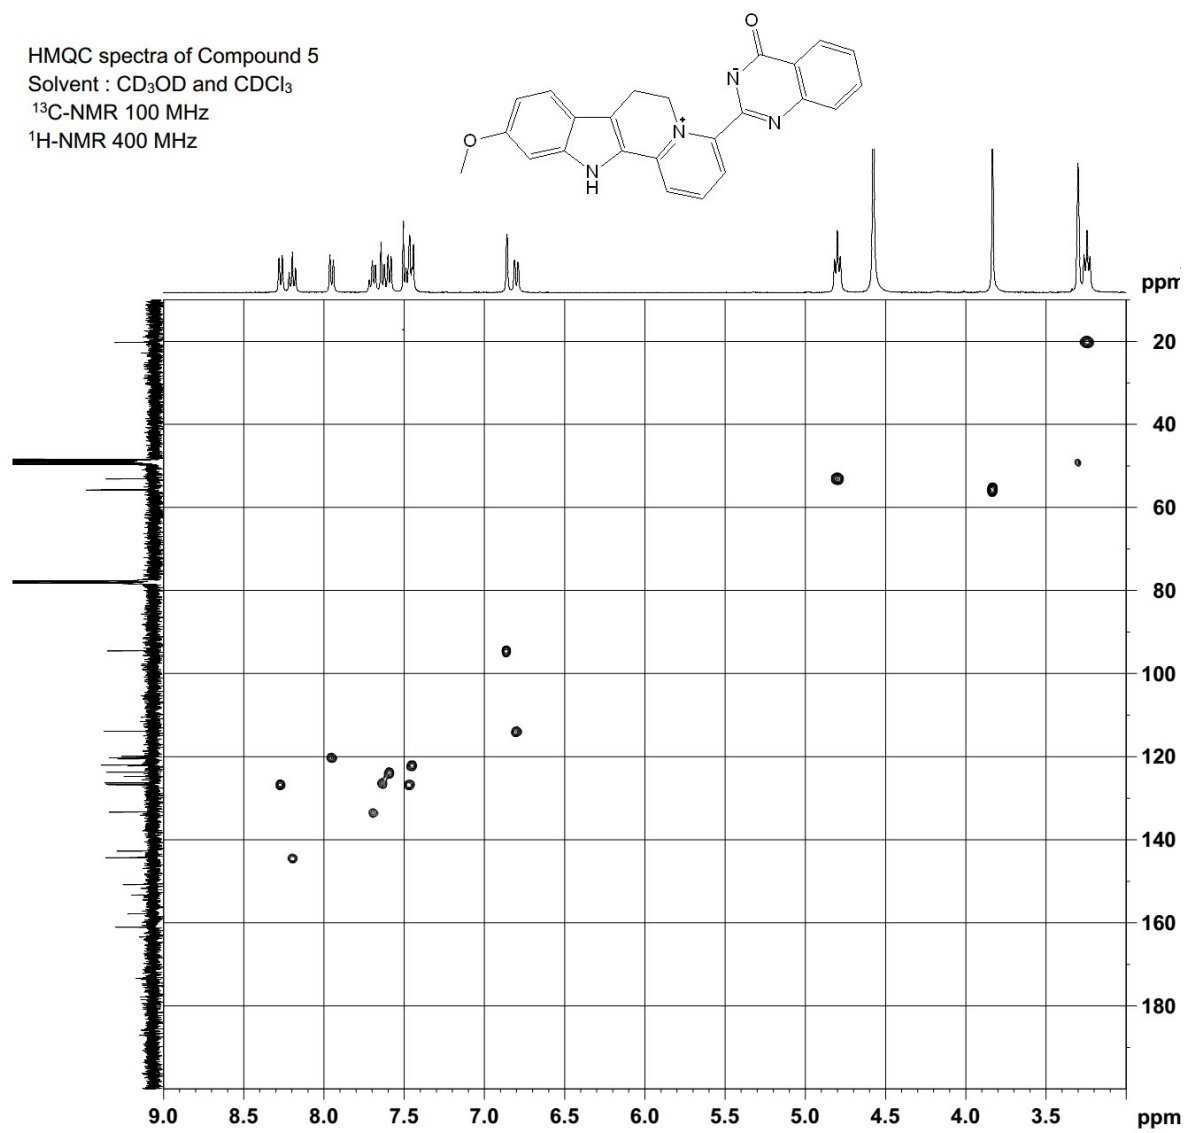

HMBC spectra of Compound 5

Solvent : CD<sub>3</sub>OD and CDCl<sub>3</sub>

<sup>13</sup>C-NMR 100 MHz

<sup>1</sup>H-NMR 400 MHz

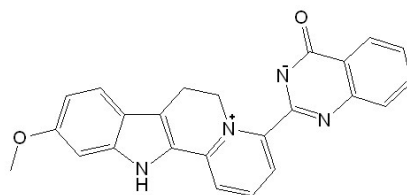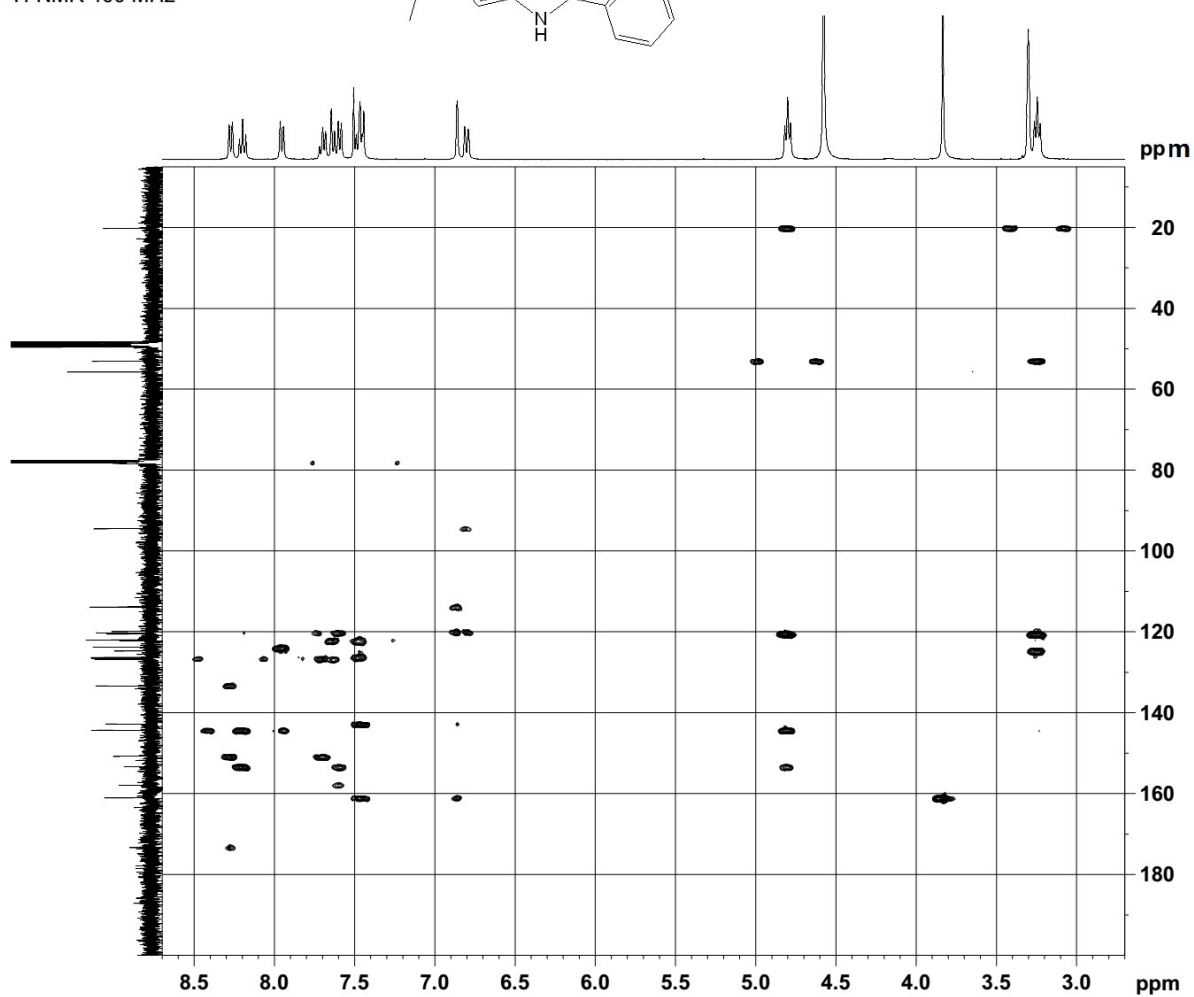



<sup>1</sup>H-<sup>1</sup>H COSY spectra of Compound 5  
 Solvent : CD<sub>3</sub>OD and CDCl<sub>3</sub>  
 600 MHz

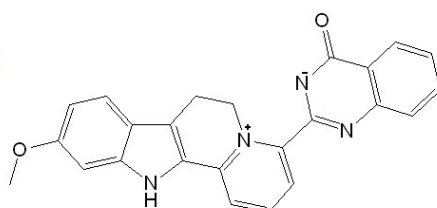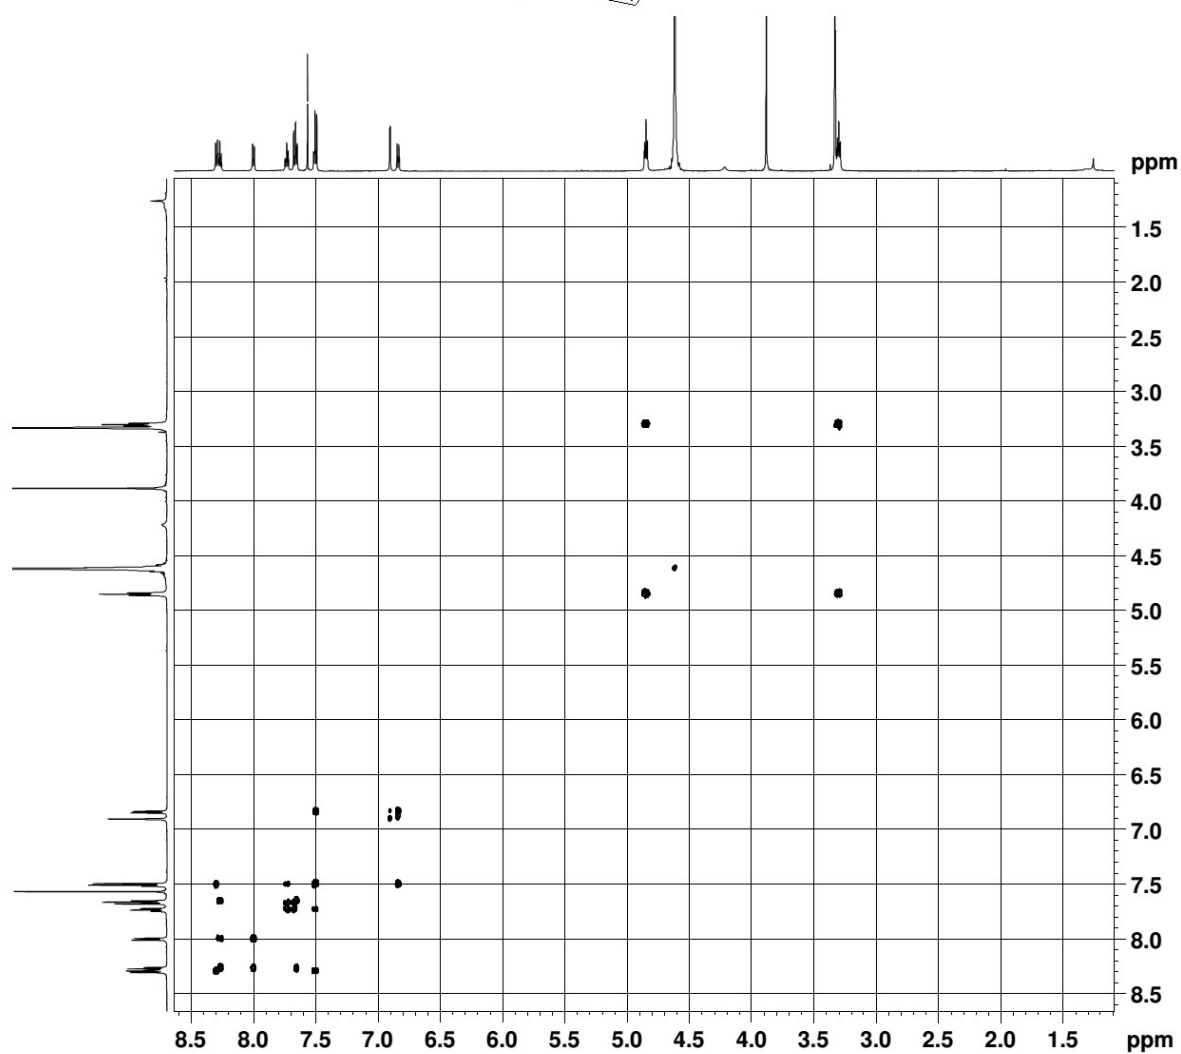

NOESY spectra of Compound 5  
 Solvent : CD<sub>3</sub>OD and CDCl<sub>3</sub>  
 600 MHz

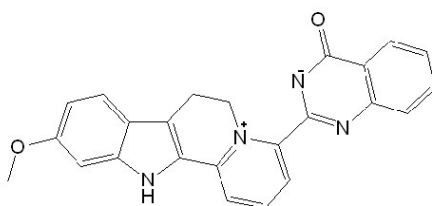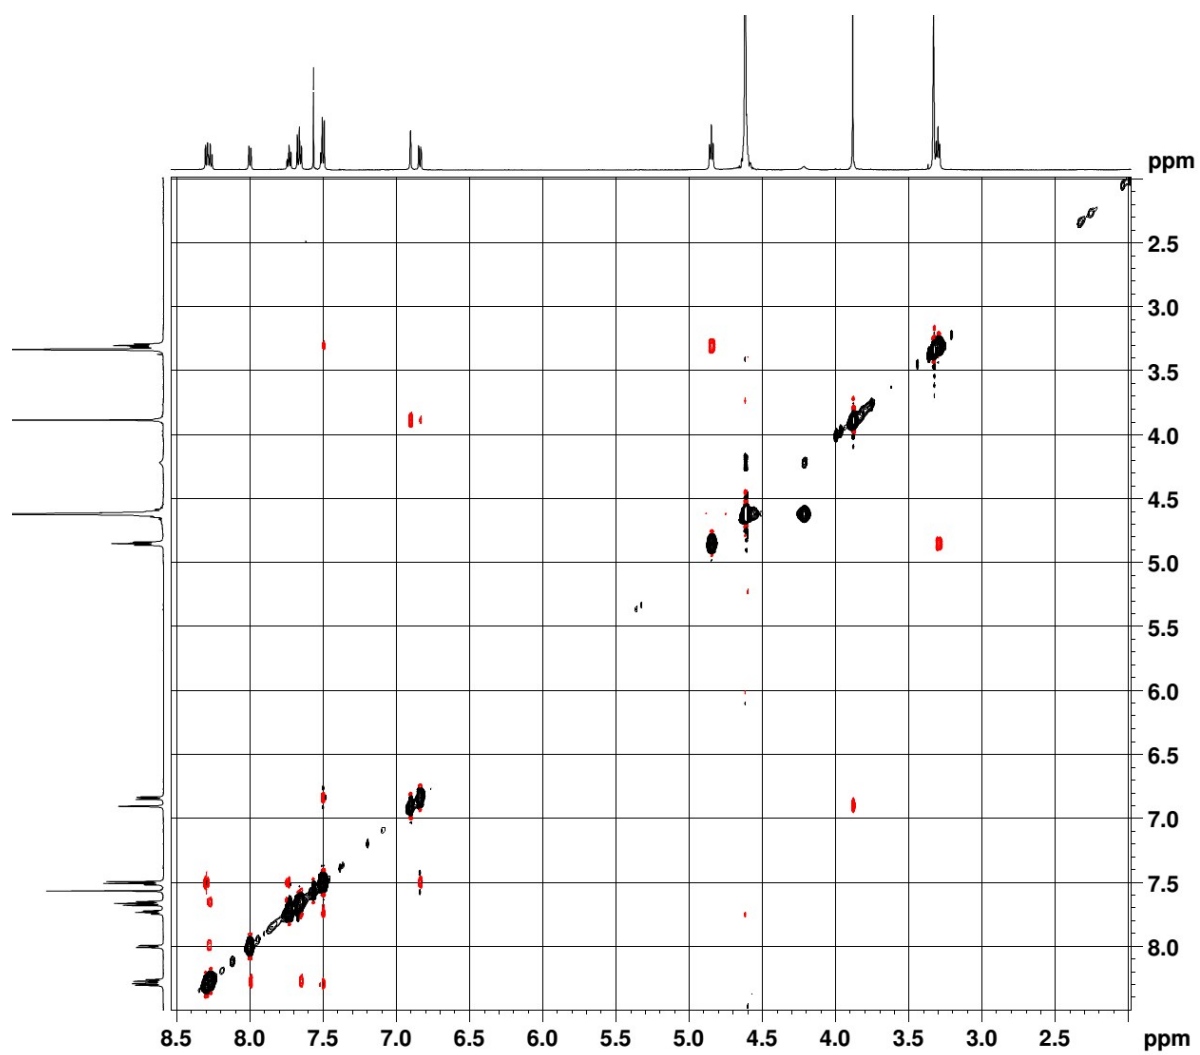

# 1.6 NMR spectrum of compound 6

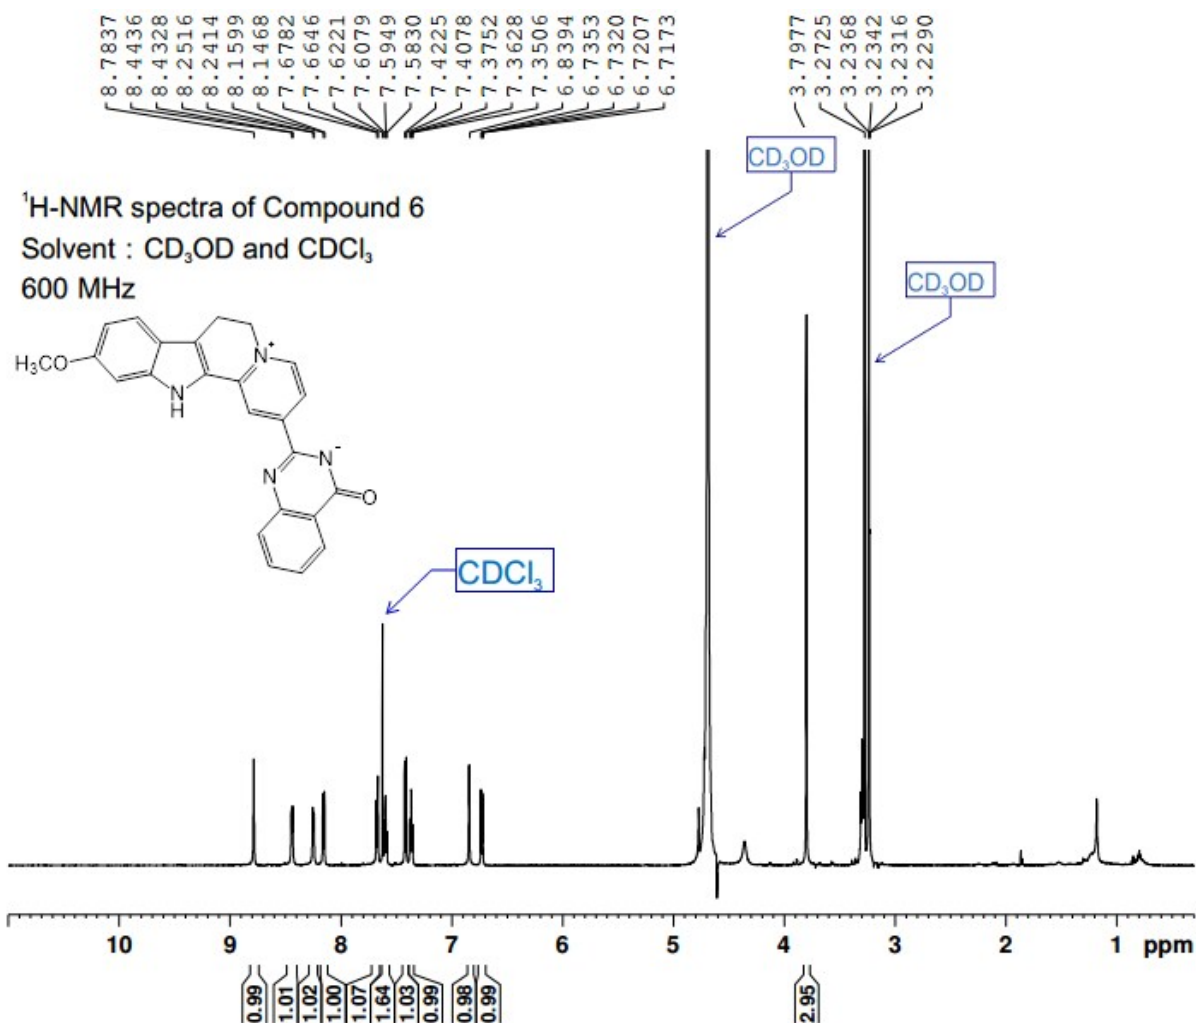

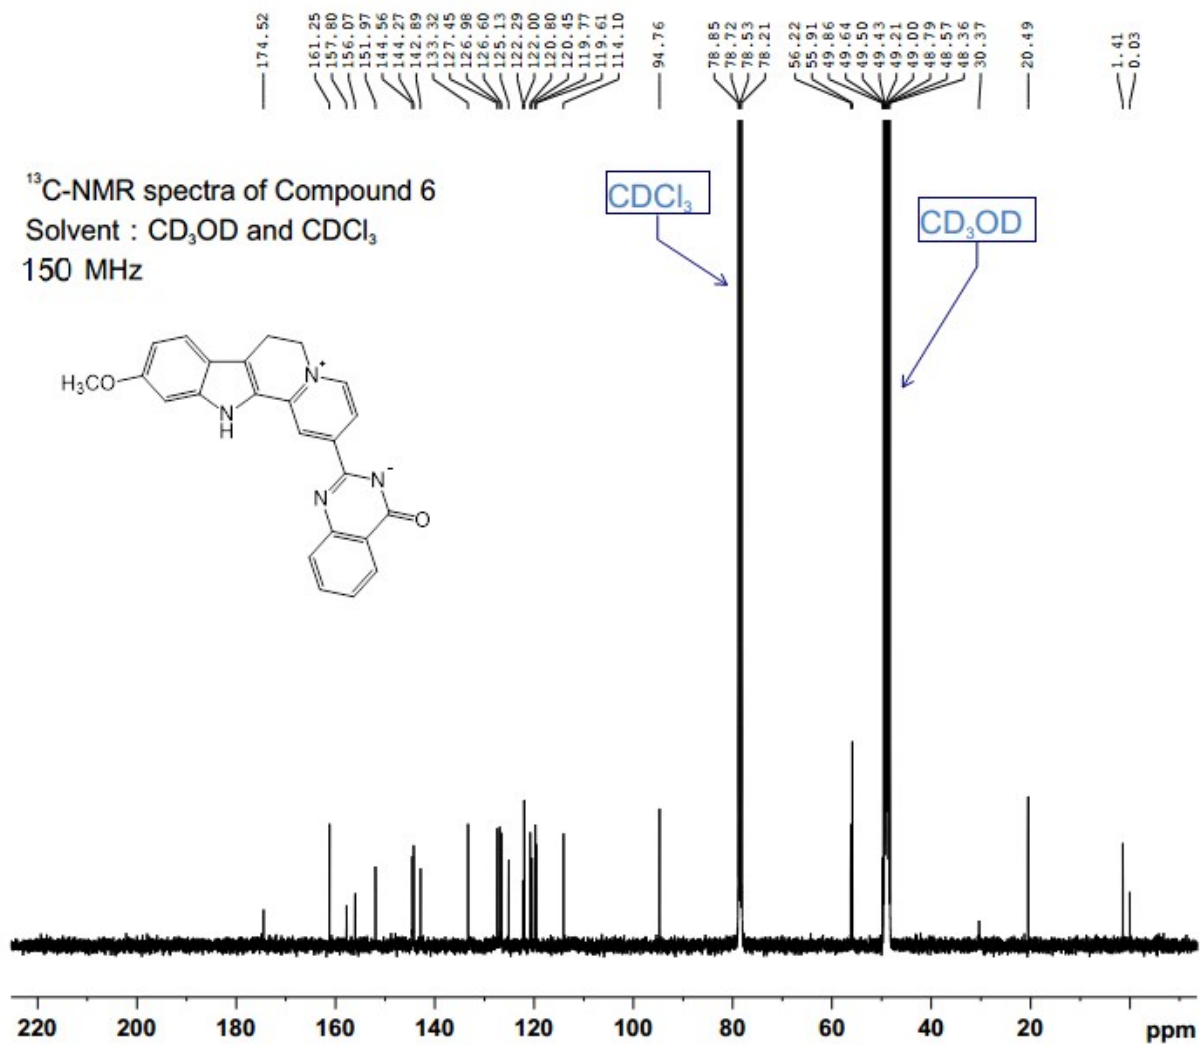

DEPT spectra of Compound 6

Solvent : CD<sub>3</sub>OD and CDCl<sub>3</sub>

<sup>13</sup>C-NMR 150 MHz

<sup>1</sup>H-NMR 600 MHz

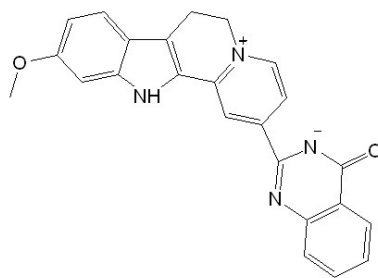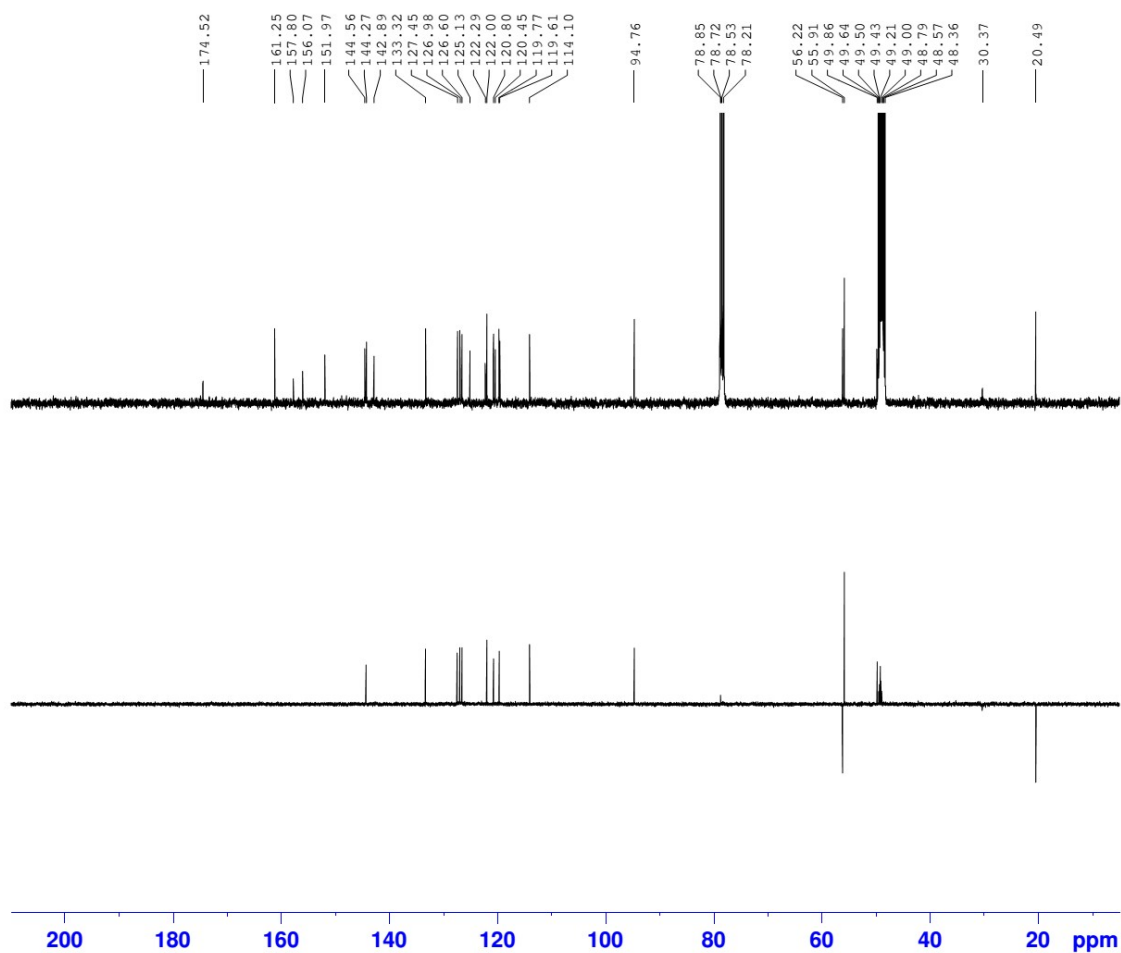

HMQC spectra of Compound 6  
 Solvent : CD<sub>3</sub>OD and CDCl<sub>3</sub>  
<sup>13</sup>C-NMR 150 MHz  
<sup>1</sup>H-NMR 600 MHz

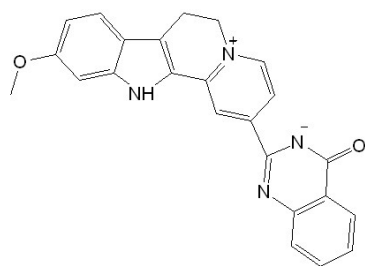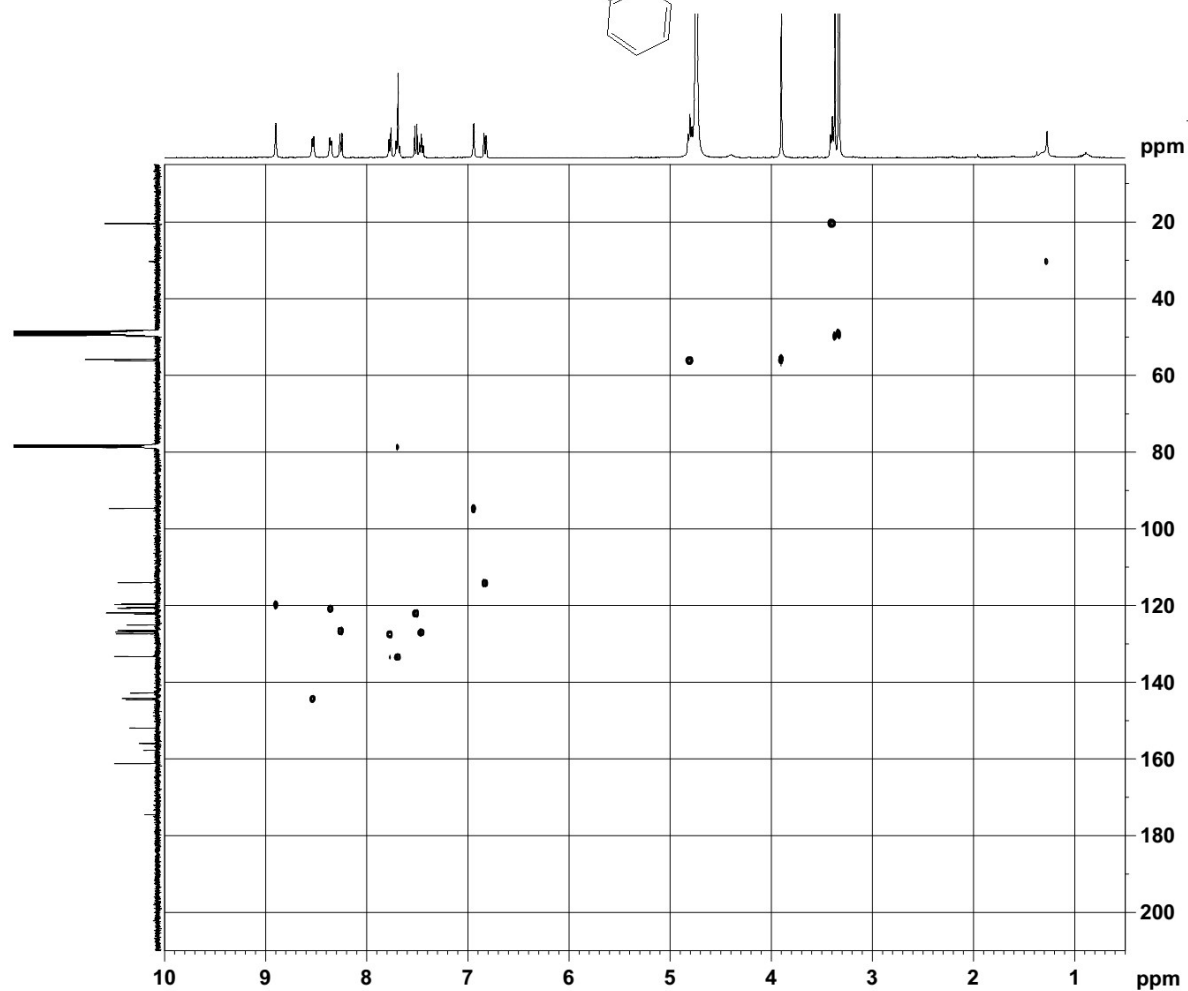

HMBC spectra of Compound 6  
 Solvent : CD<sub>3</sub>OD and CDCl<sub>3</sub>  
<sup>13</sup>C-NMR 150 MHz  
<sup>1</sup>H-NMR 600 MHz

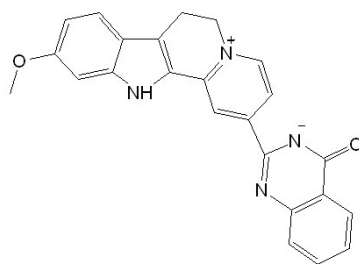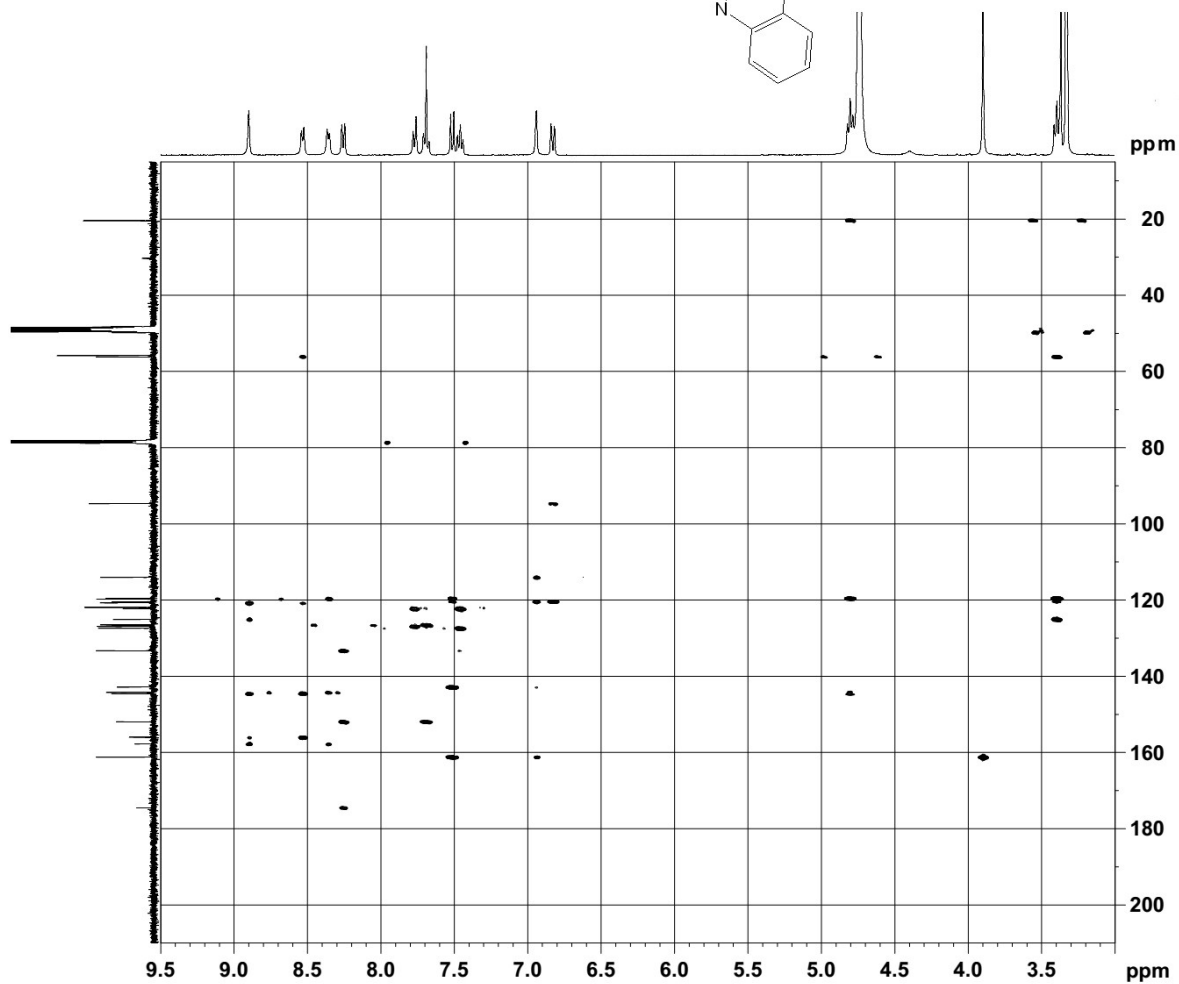

COSY spectra of Compound 6  
 Solvent : CD<sub>3</sub>OD and CDCl<sub>3</sub>  
 600 MHz

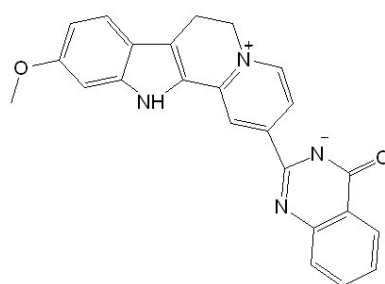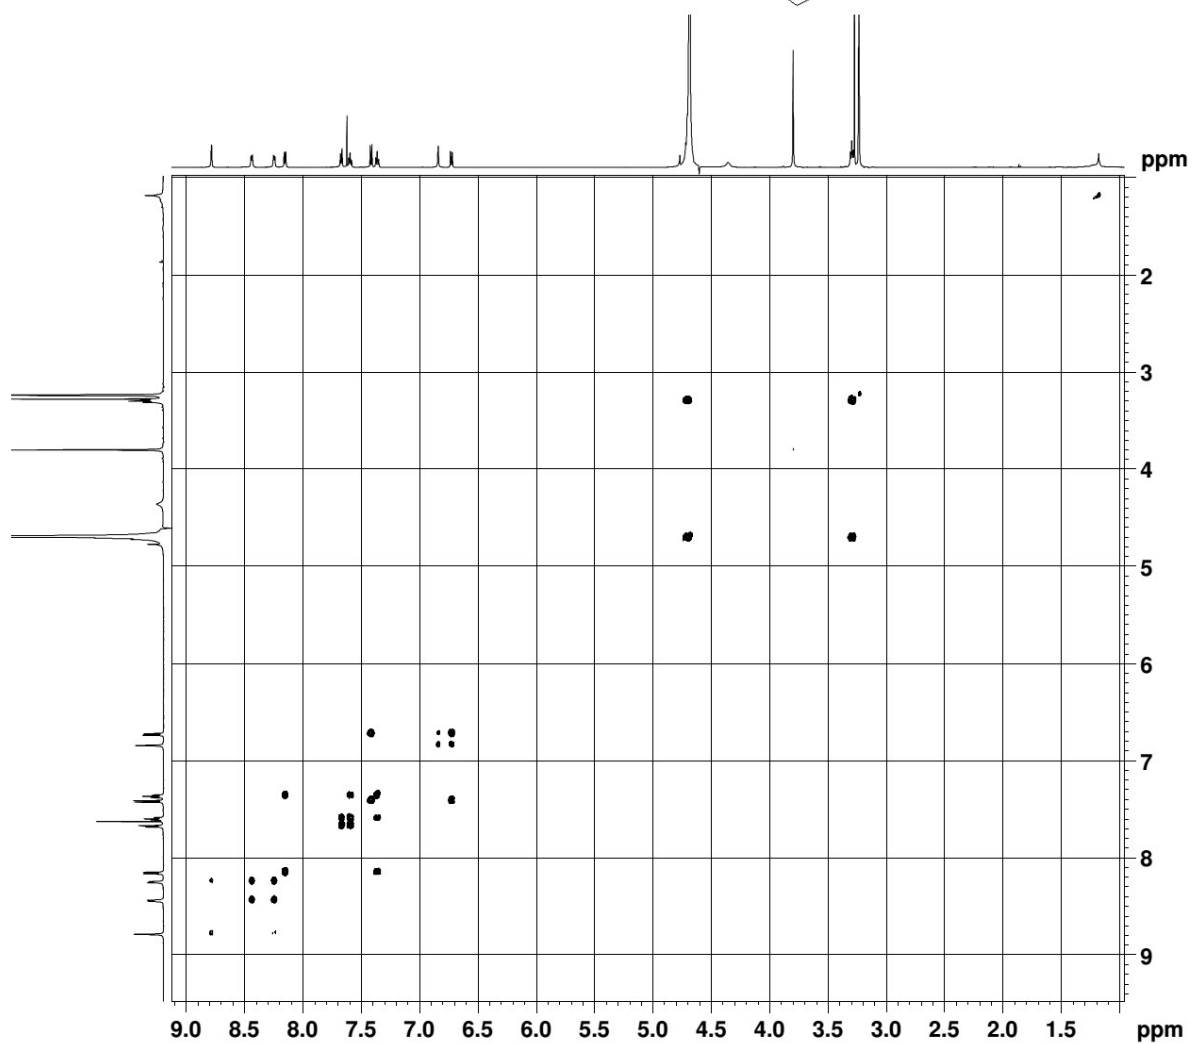



NOESY spectra of Compound 6  
Solvent : CD<sub>3</sub>OD and CDCl<sub>3</sub>  
600 MHz

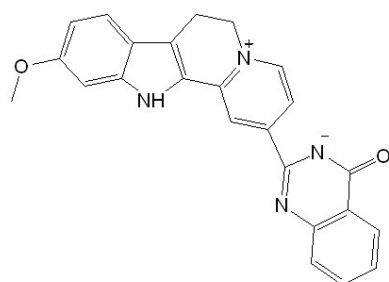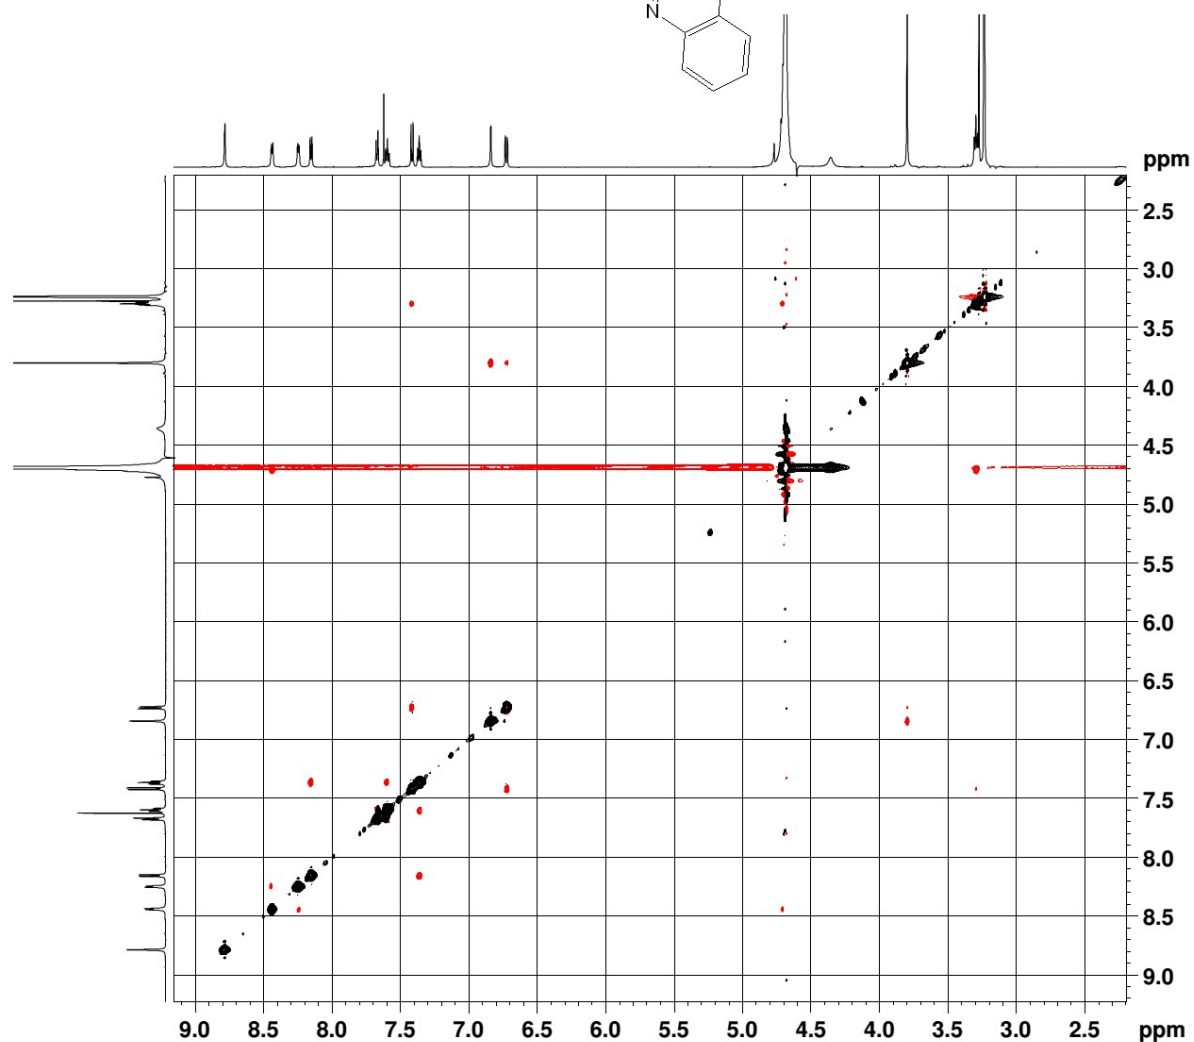

# 1.7 NMR spectrum of compound 7

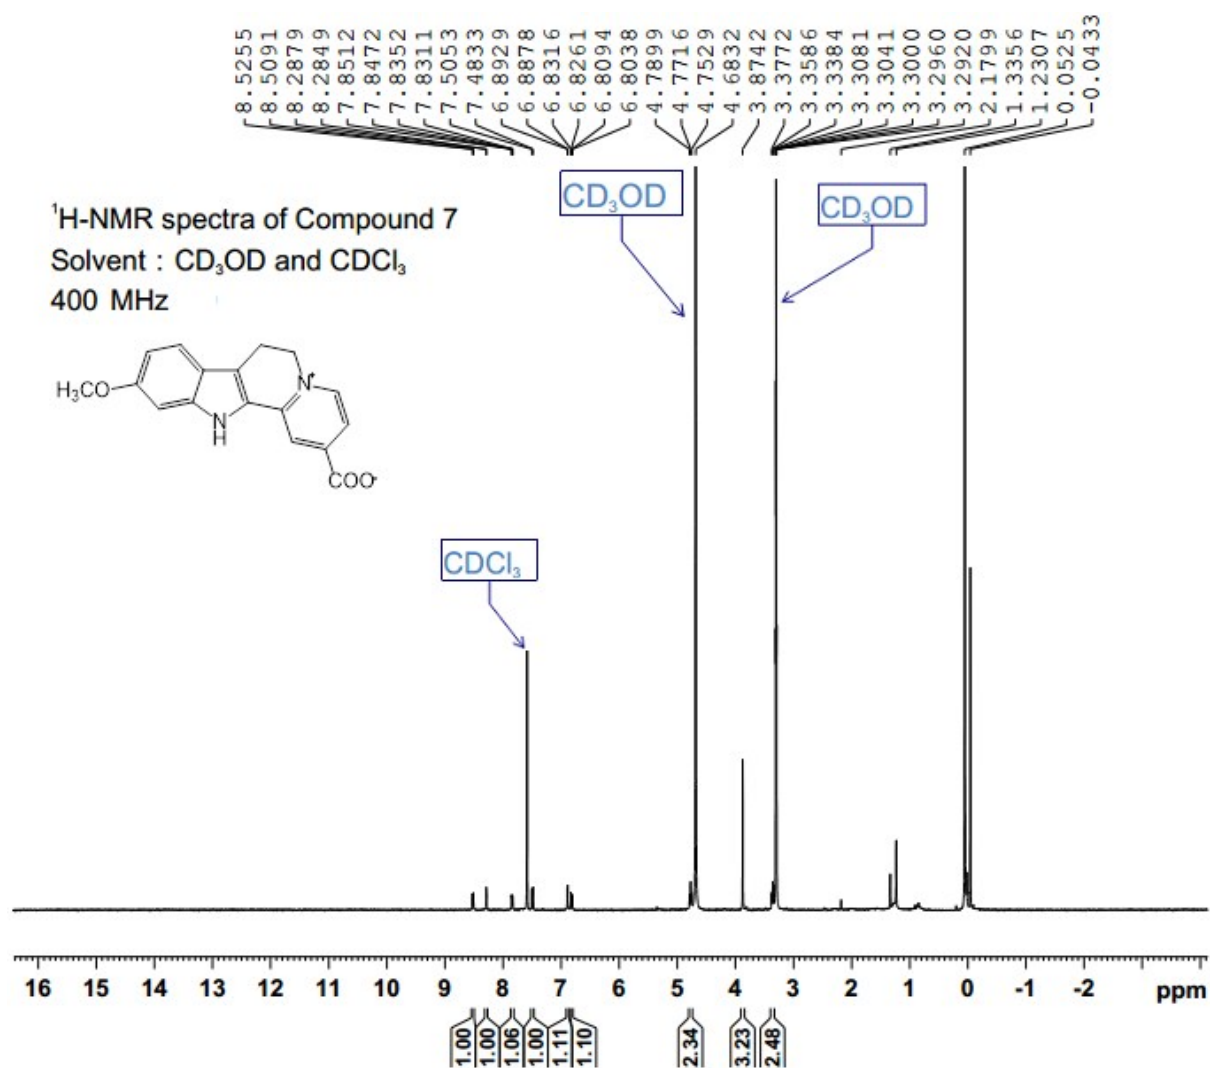

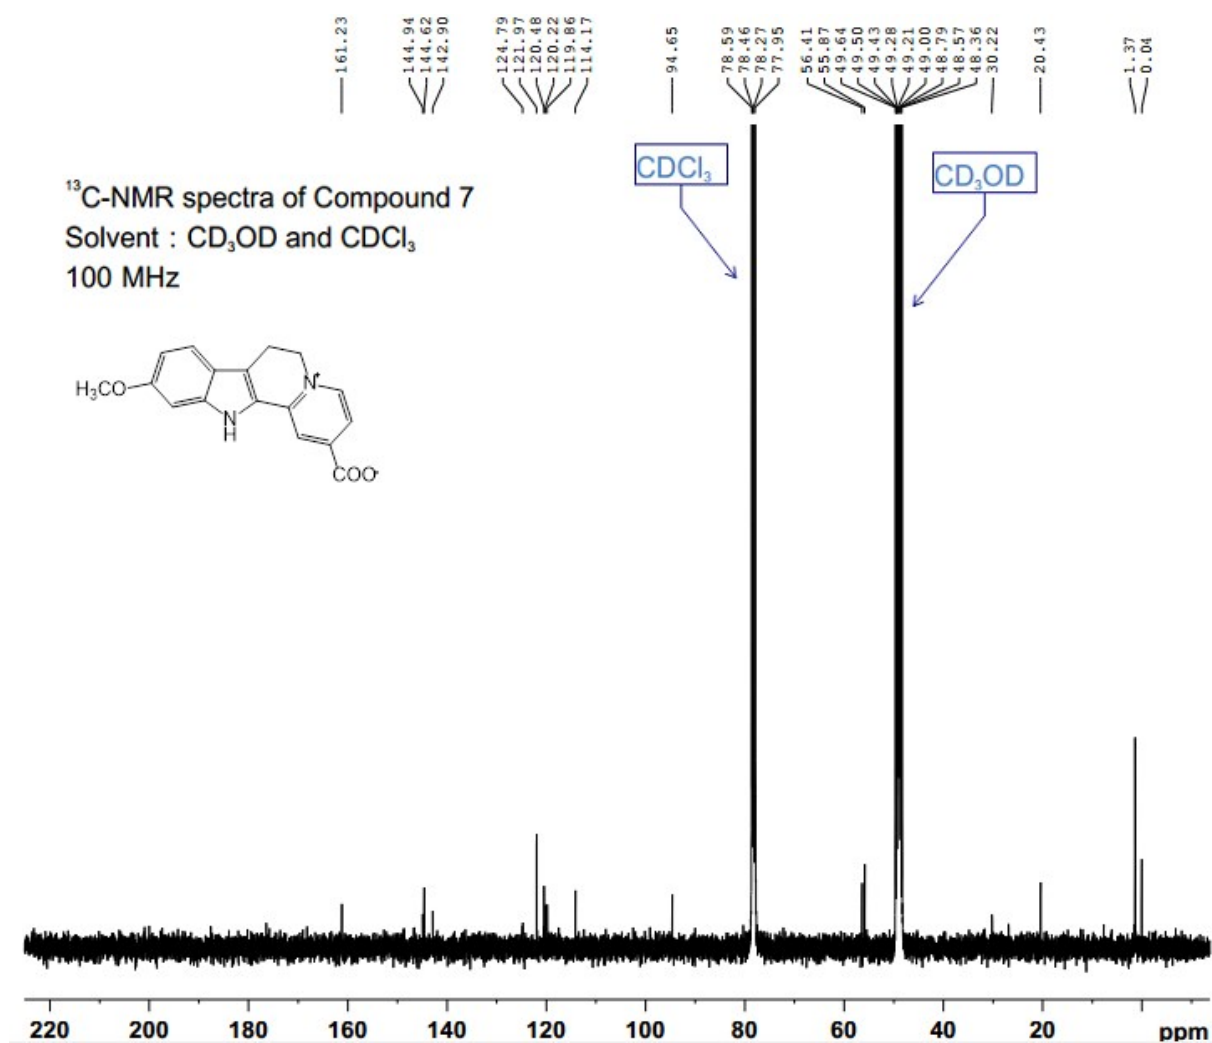

DEPT spectra of Compound 7  
 Solvent : CD<sub>3</sub>OD and CDCl<sub>3</sub>  
<sup>13</sup>C-NMR 100 MHz  
<sup>1</sup>H-NMR 400 MHz

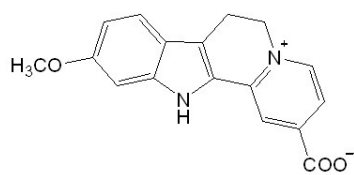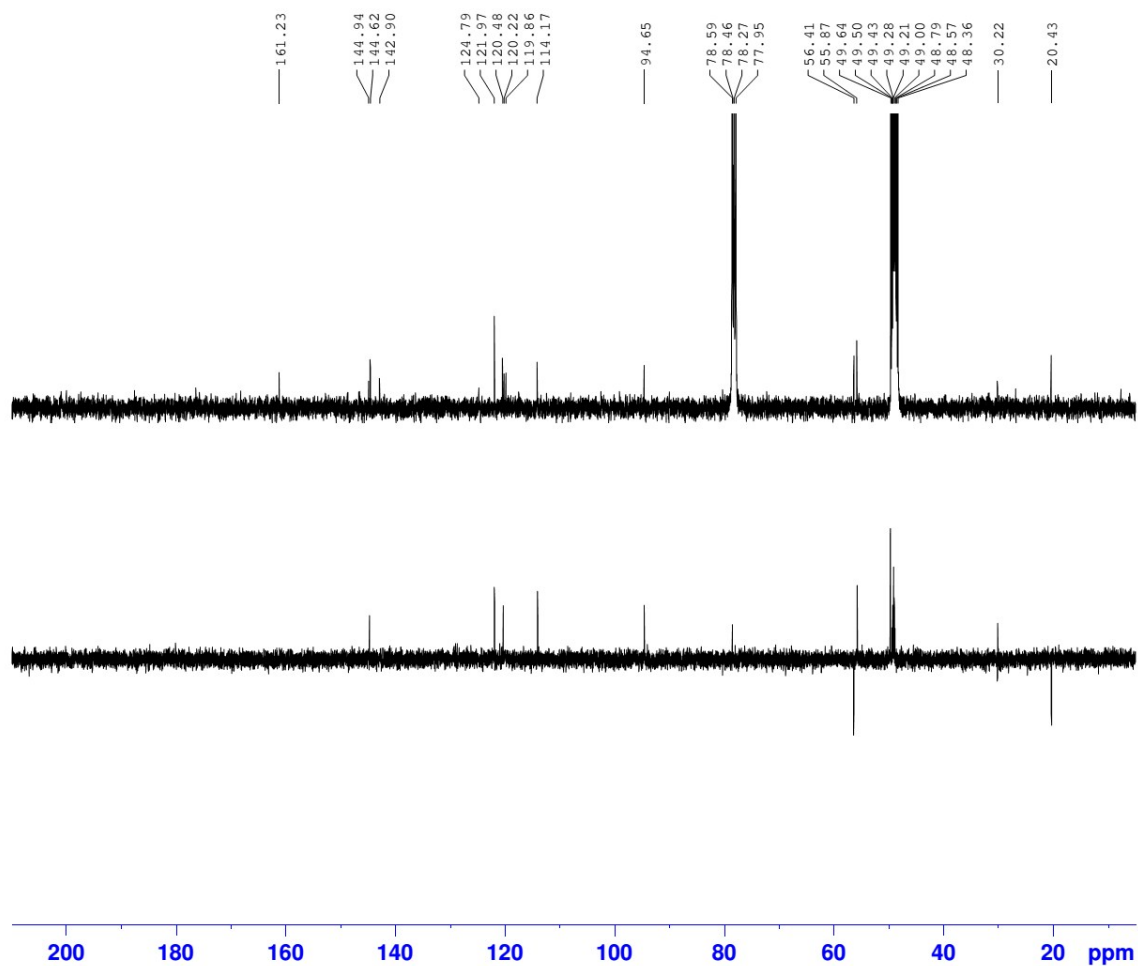

HMQC spectra of Compound 7

Solvent : CD<sub>3</sub>OD and CDCl<sub>3</sub>

<sup>13</sup>C-NMR 150 MHz

<sup>1</sup>H-NMR 600 MHz

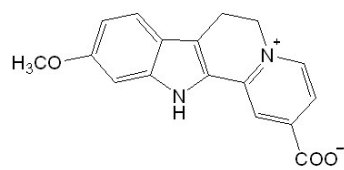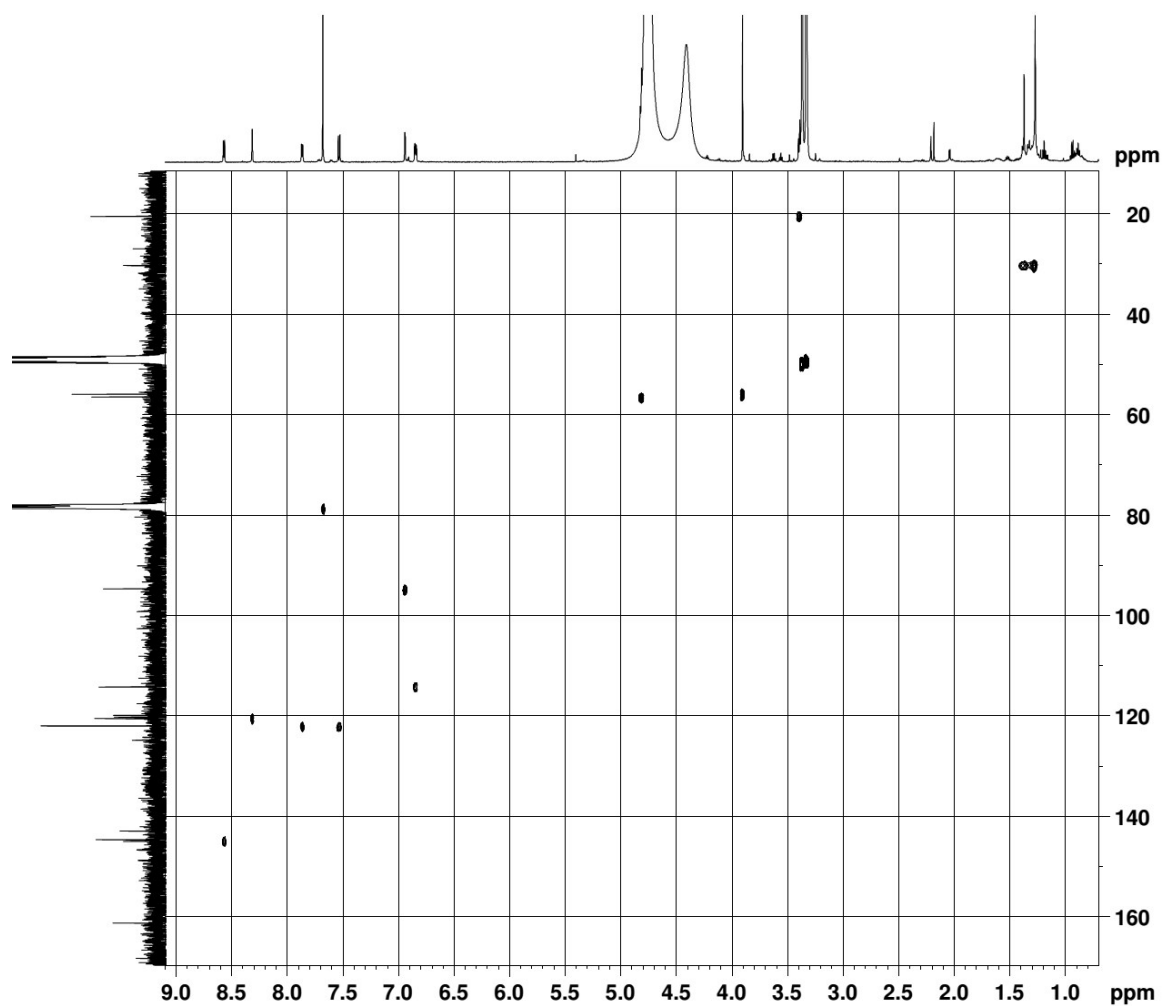

HMBC spectra of Compound 7  
 Solvent : CD<sub>3</sub>OD and CDCl<sub>3</sub>  
<sup>13</sup>C-NMR 150 MHz  
<sup>1</sup>H-NMR 600 MHz

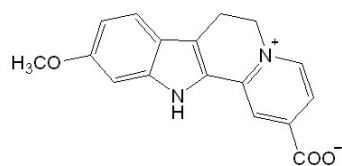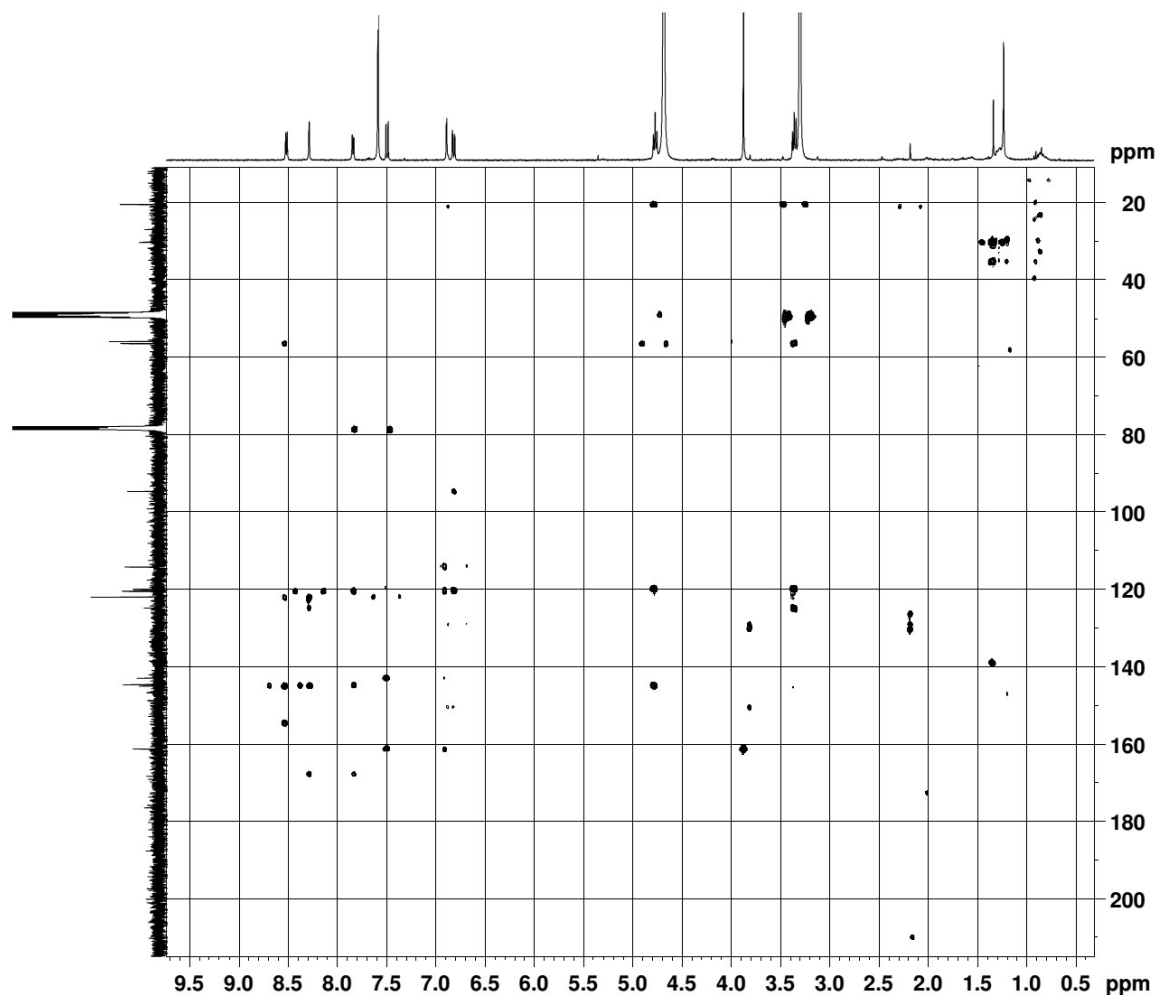

COSY spectra of Compound 7  
 Solvent : CD<sub>3</sub>OD and CDCl<sub>3</sub>  
 600 MHz

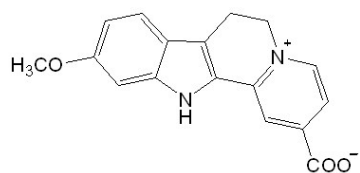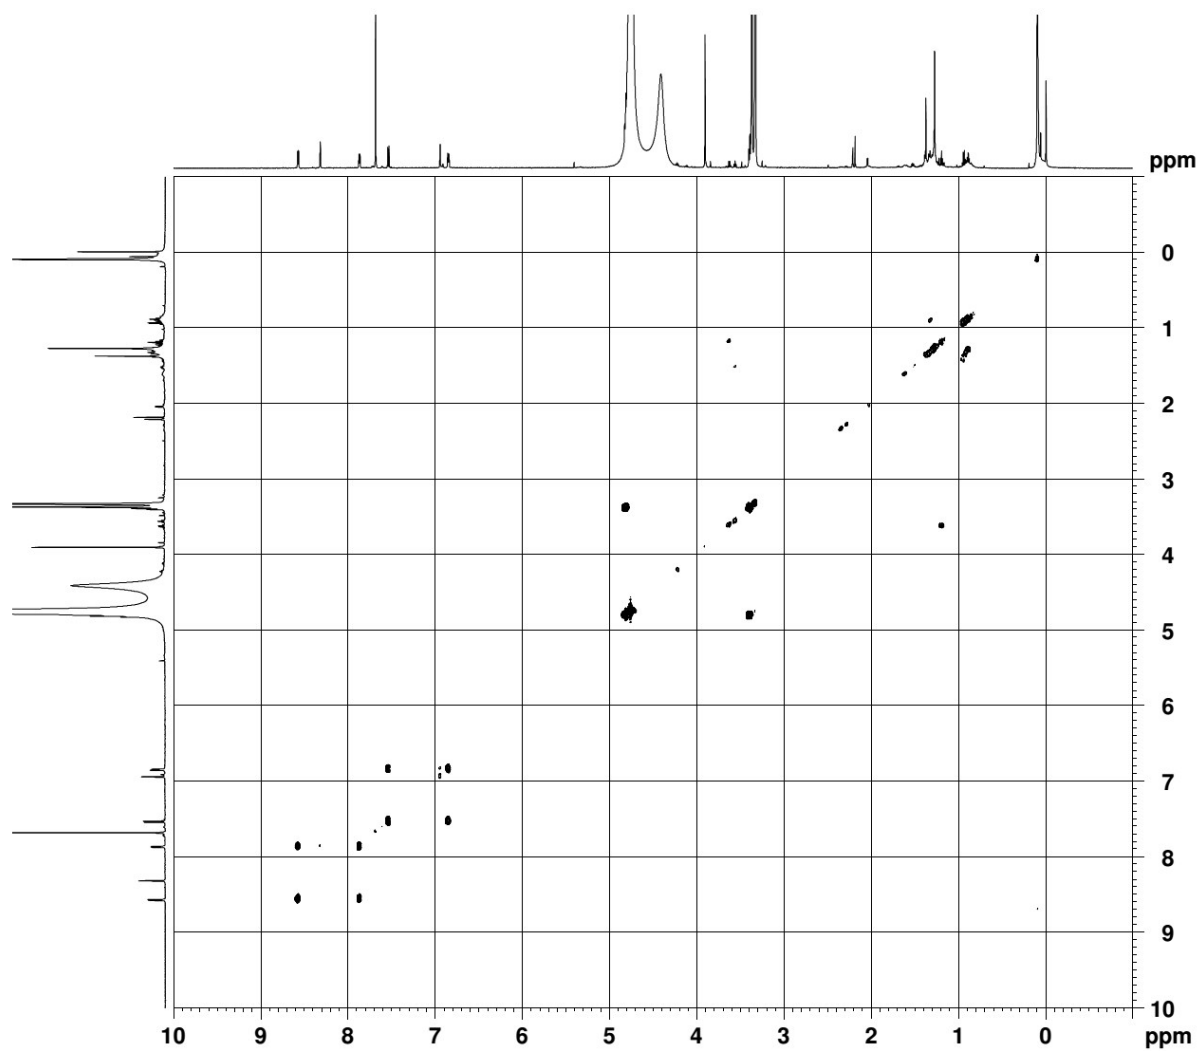

NOESY spectra of Compound 7  
 Solvent : CD<sub>3</sub>OD and CDCl<sub>3</sub>  
 600 MHz

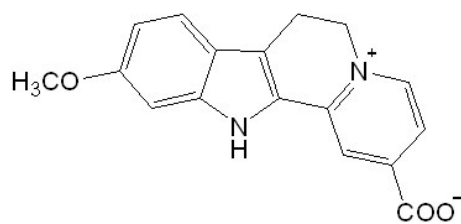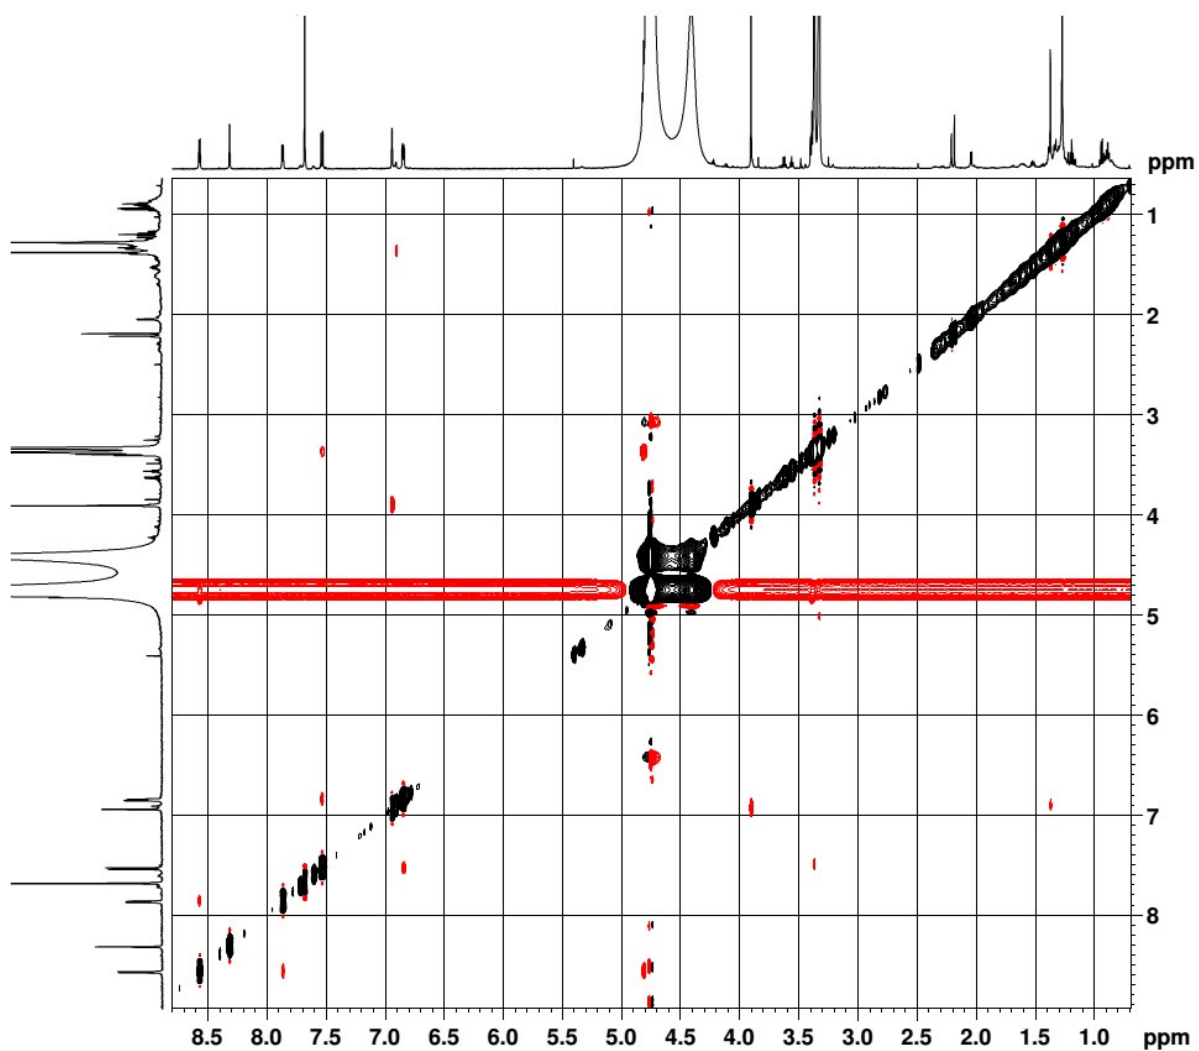



# 1.8 NMR spectrum of compound 8

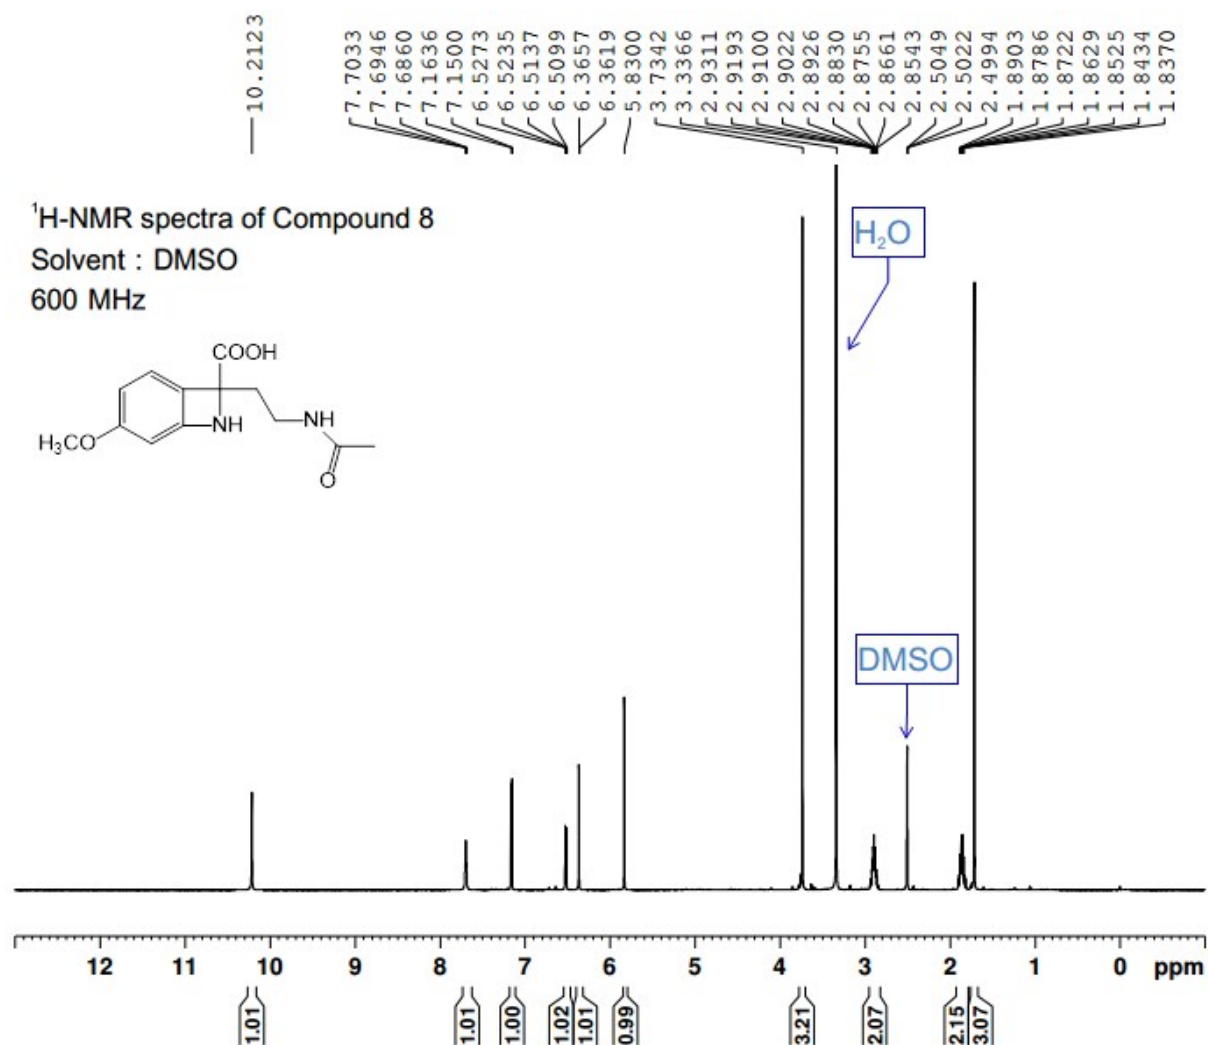

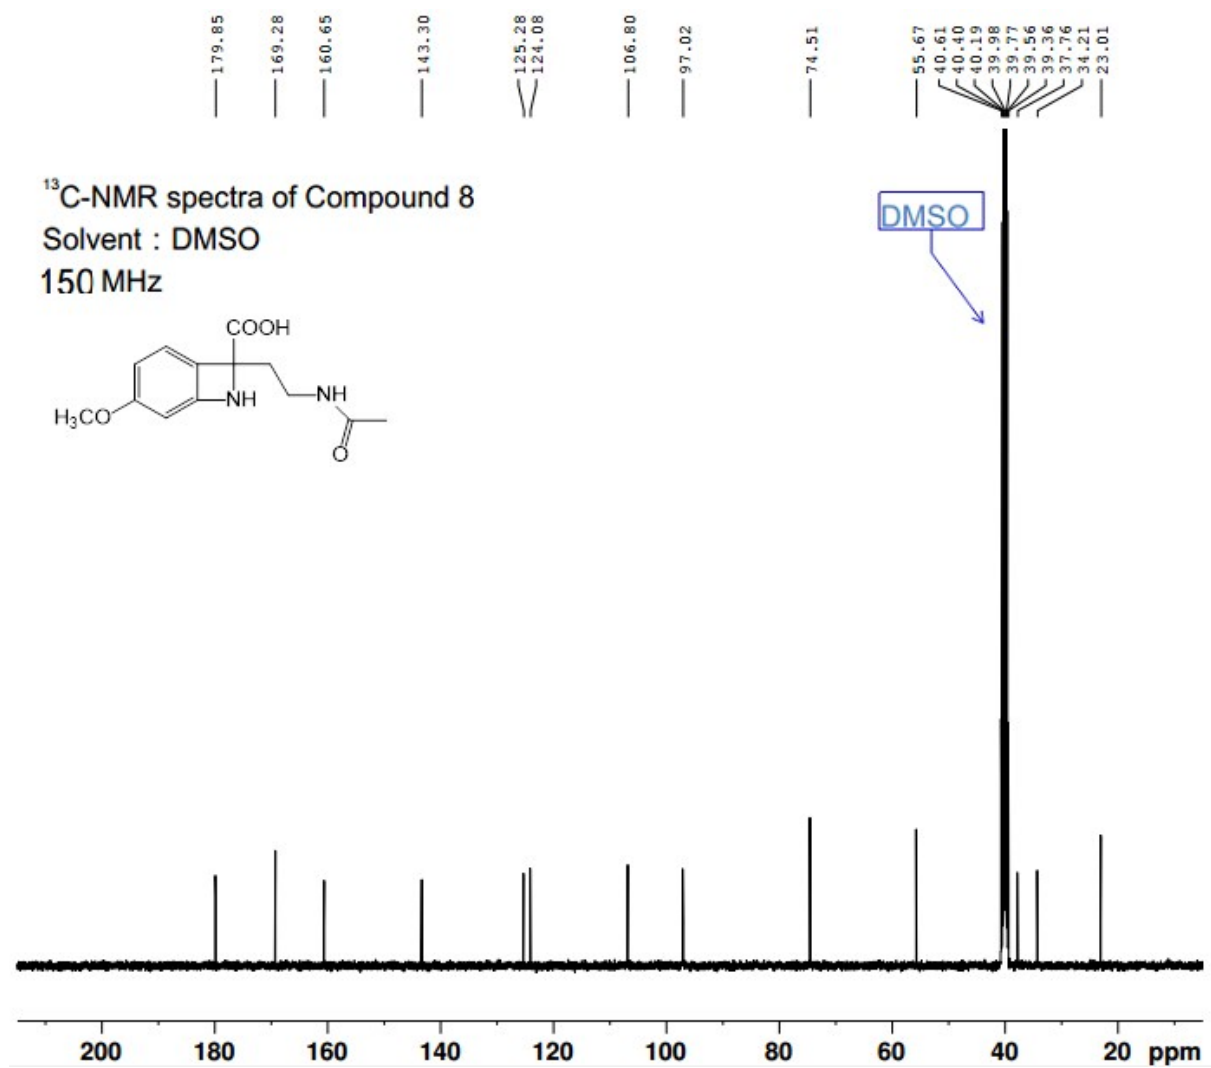

DEPT spectra of Compound 8

Solvent : DMSO

$^{13}\text{C}$ -NMR 150 MHz

$^1\text{H}$ -NMR 600 MHz

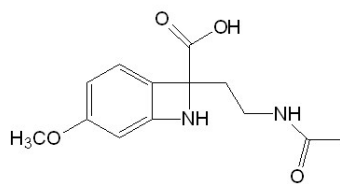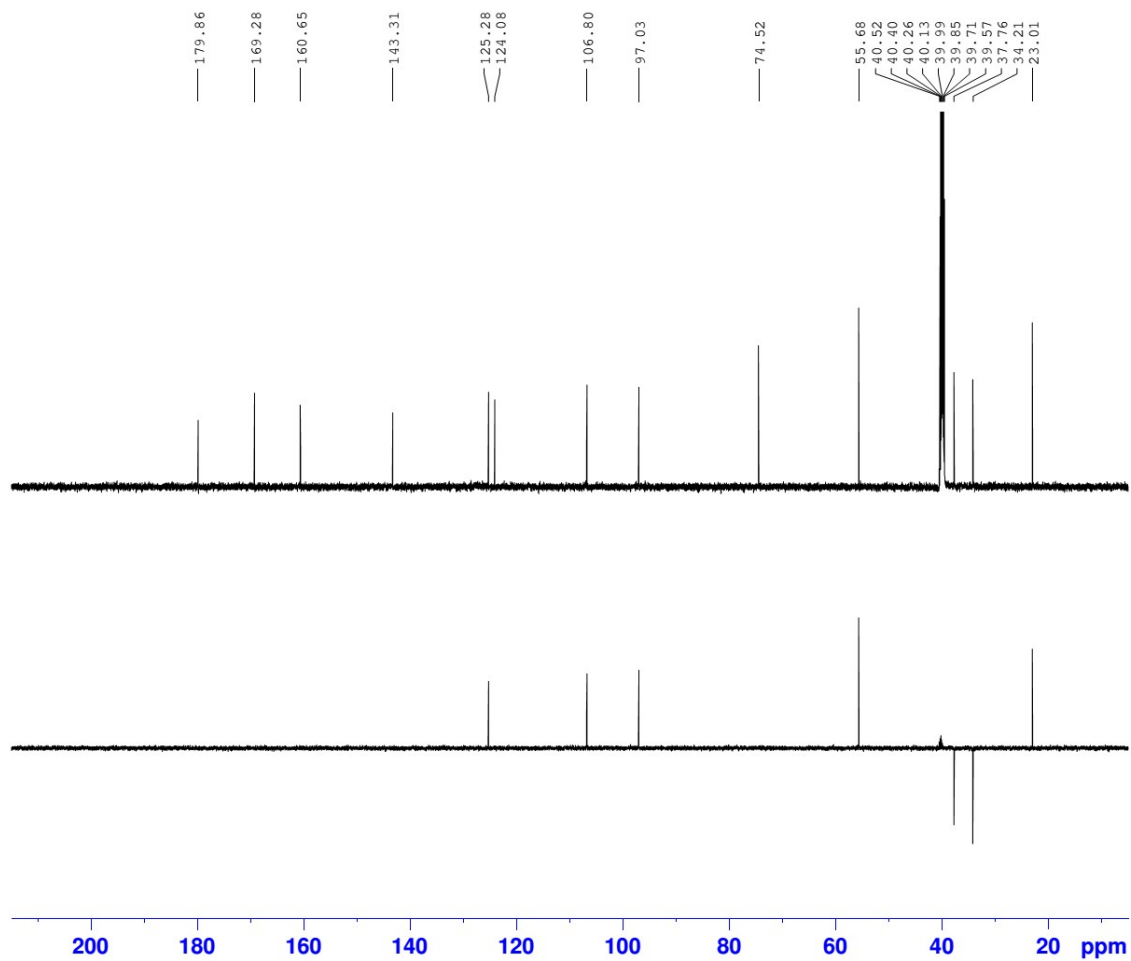

HMQC spectra of Compound 8

Solvent : DMSO

$^{13}\text{C}$ -NMR 150 MHz

$^1\text{H}$ -NMR 600 MHz

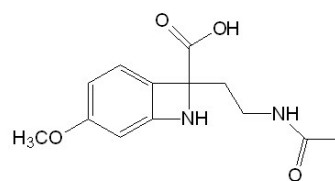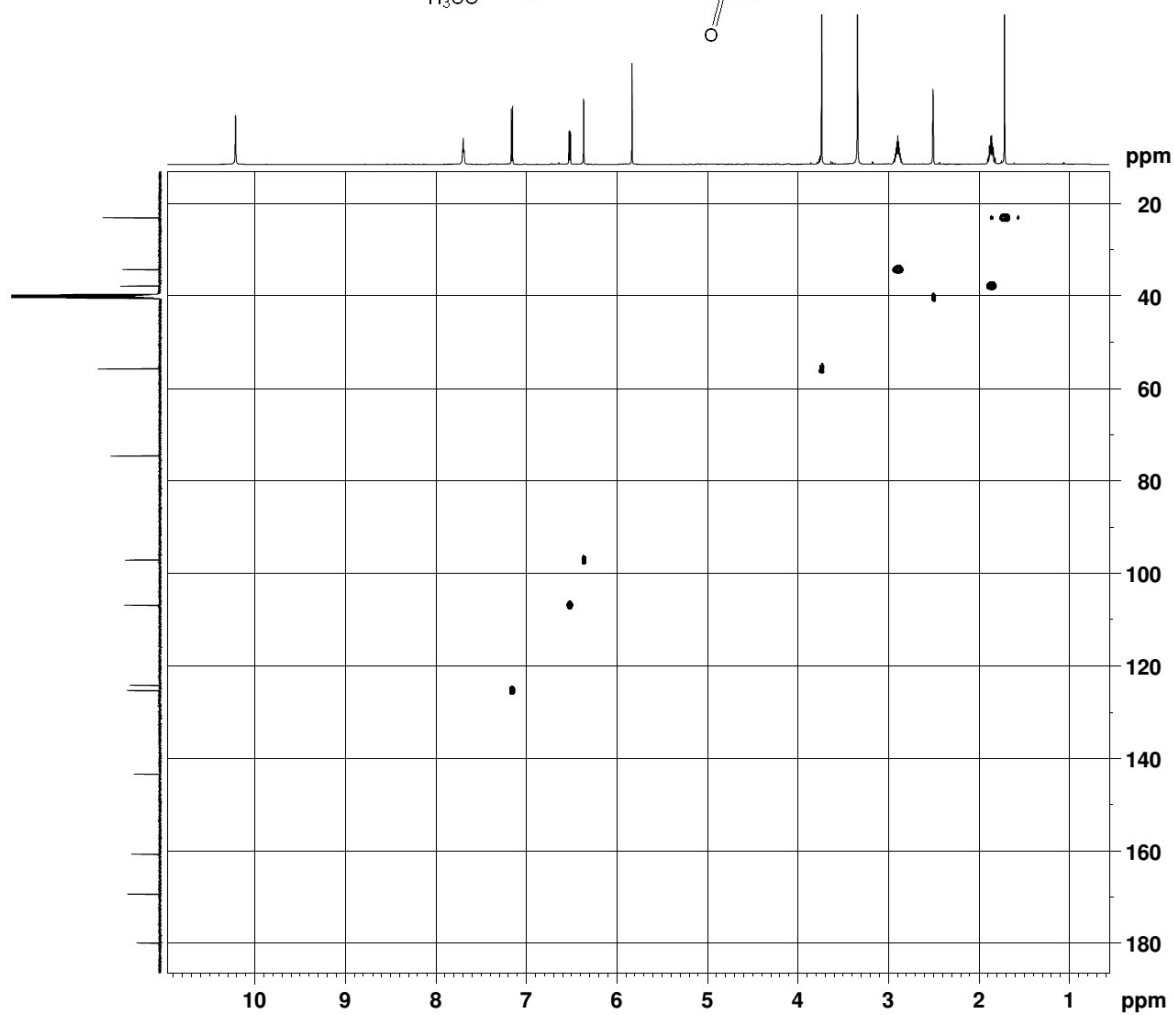

HMBC spectra of Compound 8

Solvent : DMSO

$^{13}\text{C}$ -NMR 150 MHz

$^1\text{H}$ -NMR 600 MHz

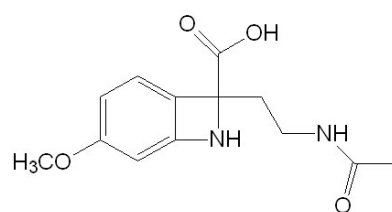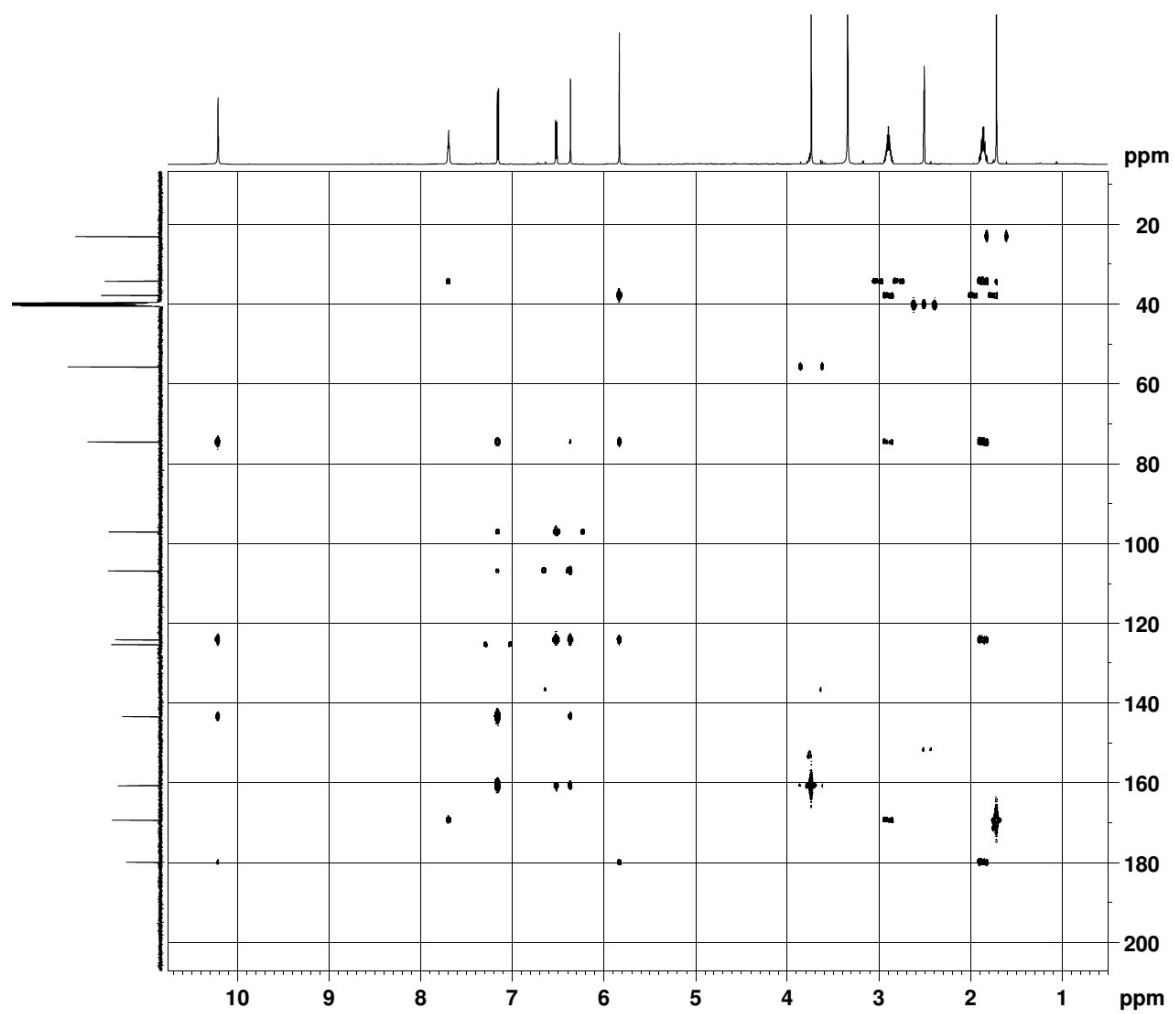

400 MHz

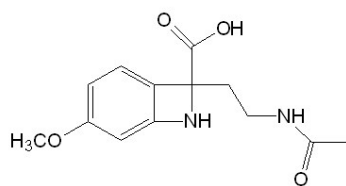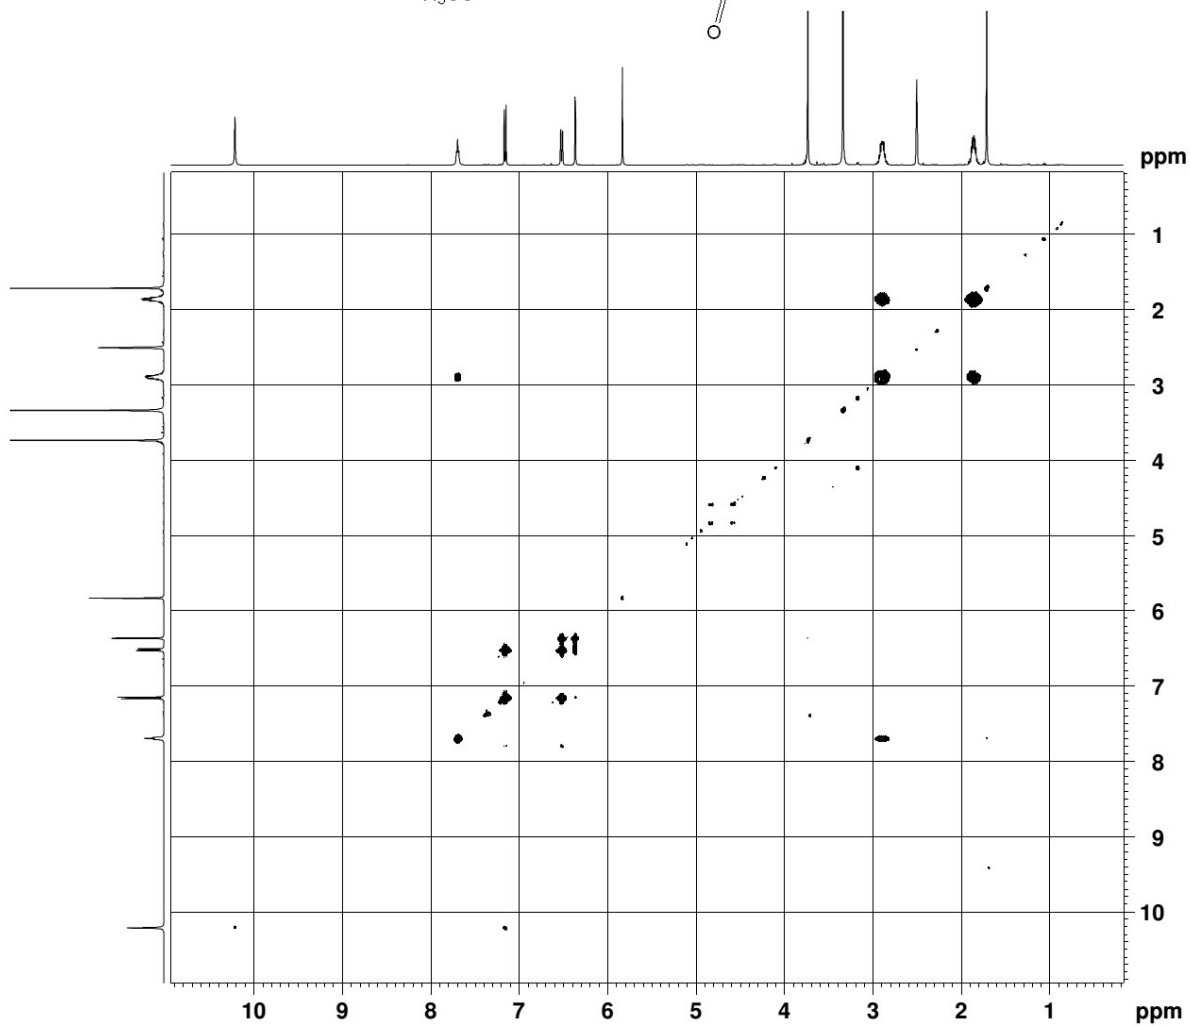

CC(=O)NCC1C(=O)C2=CC=C(C=C2C1)OC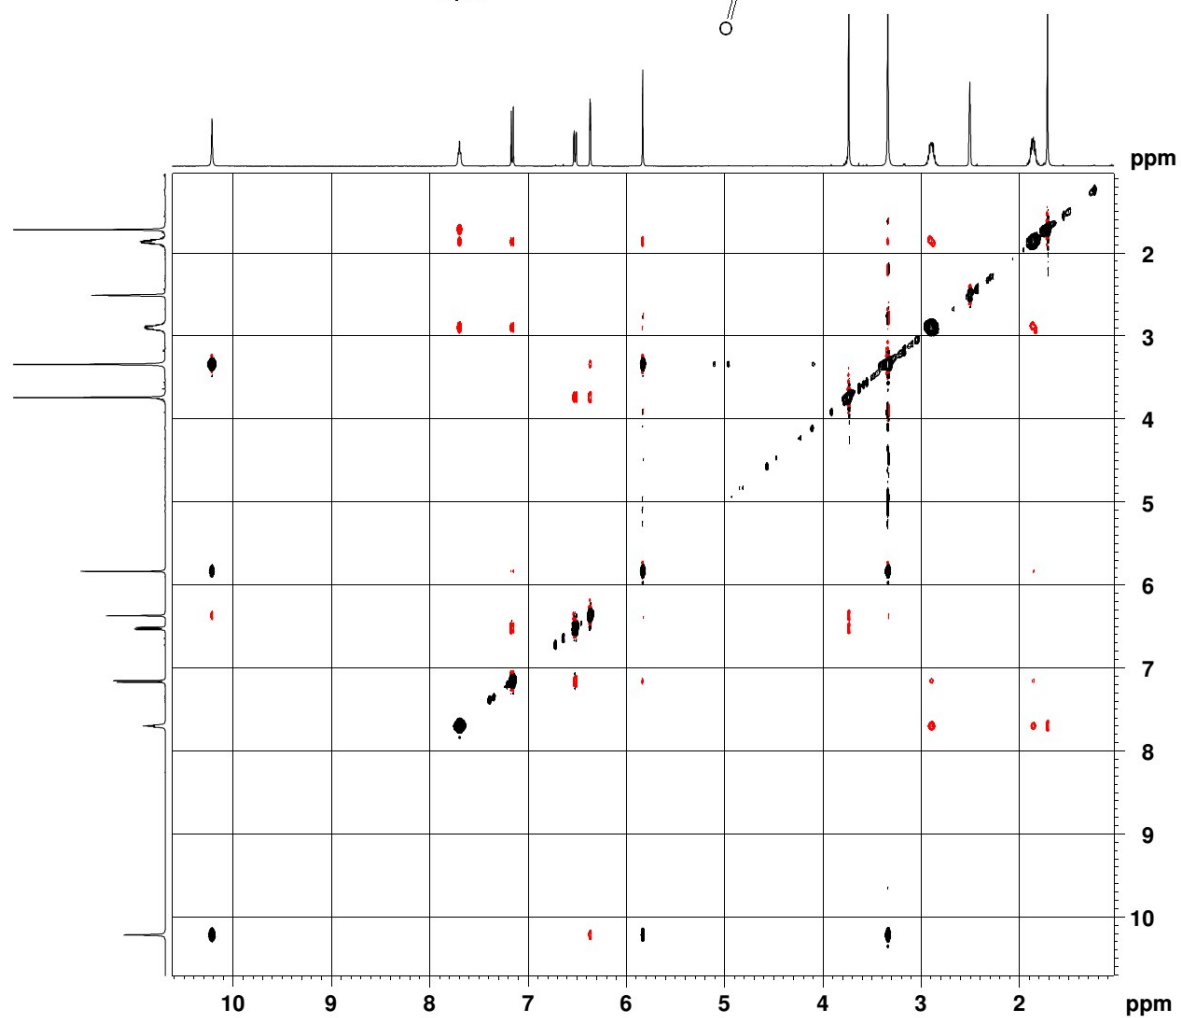

## 2 IR Spectrum of new compounds

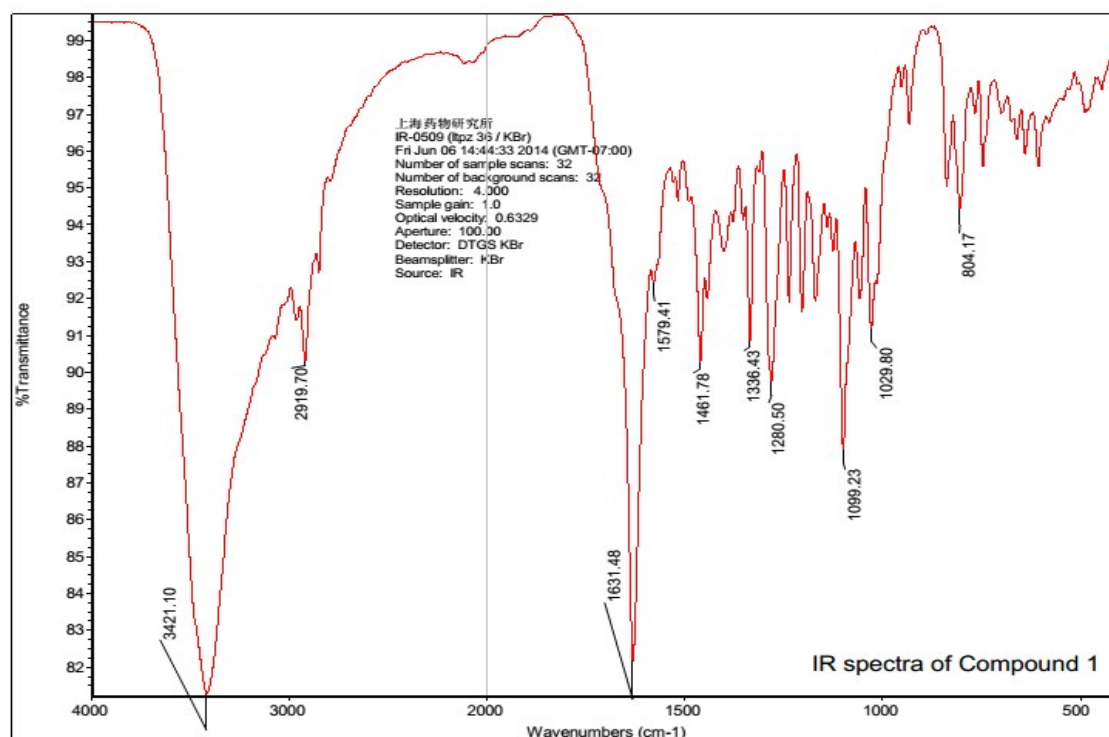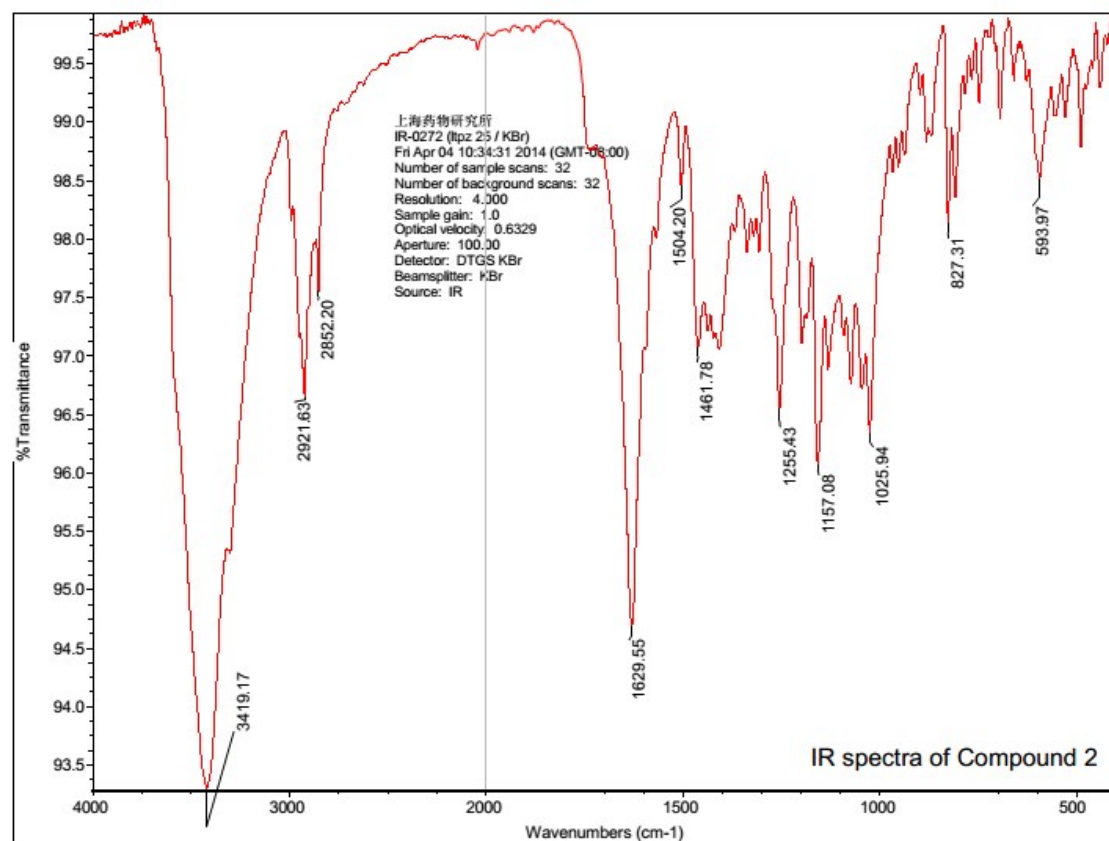



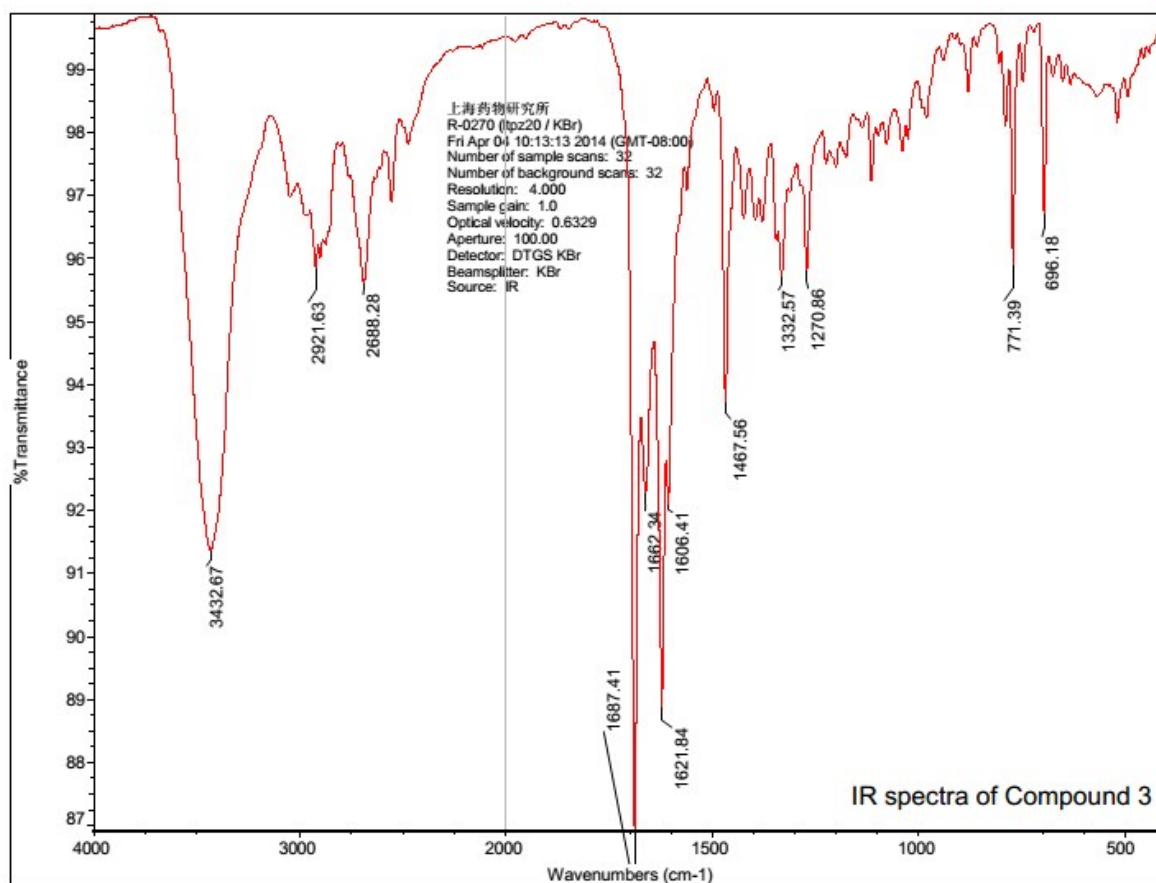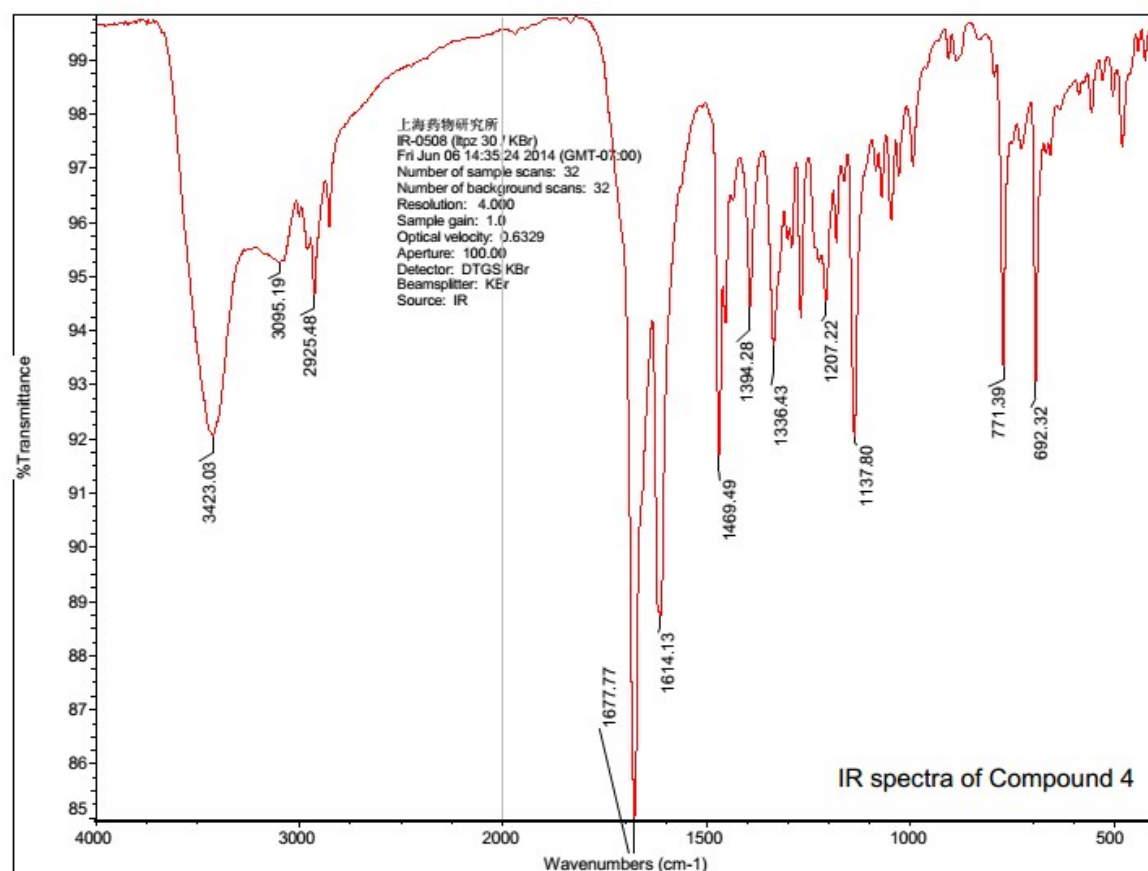

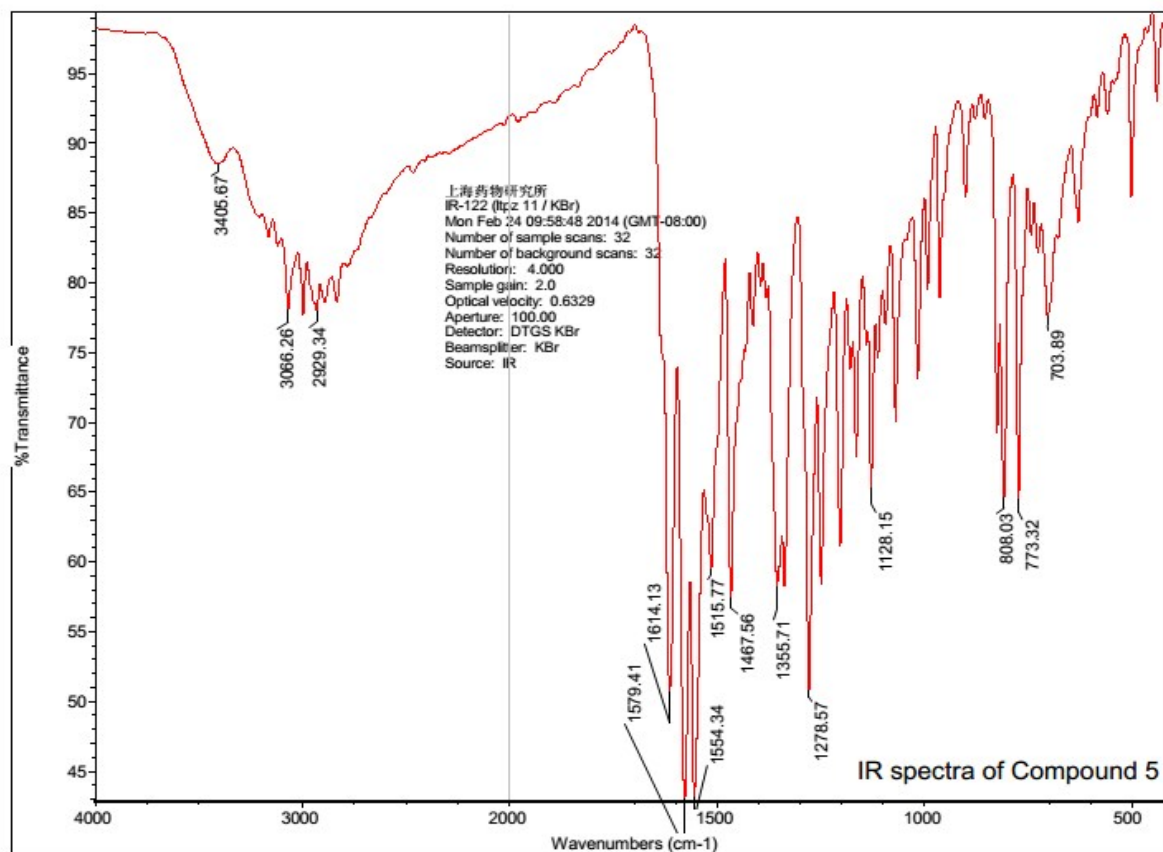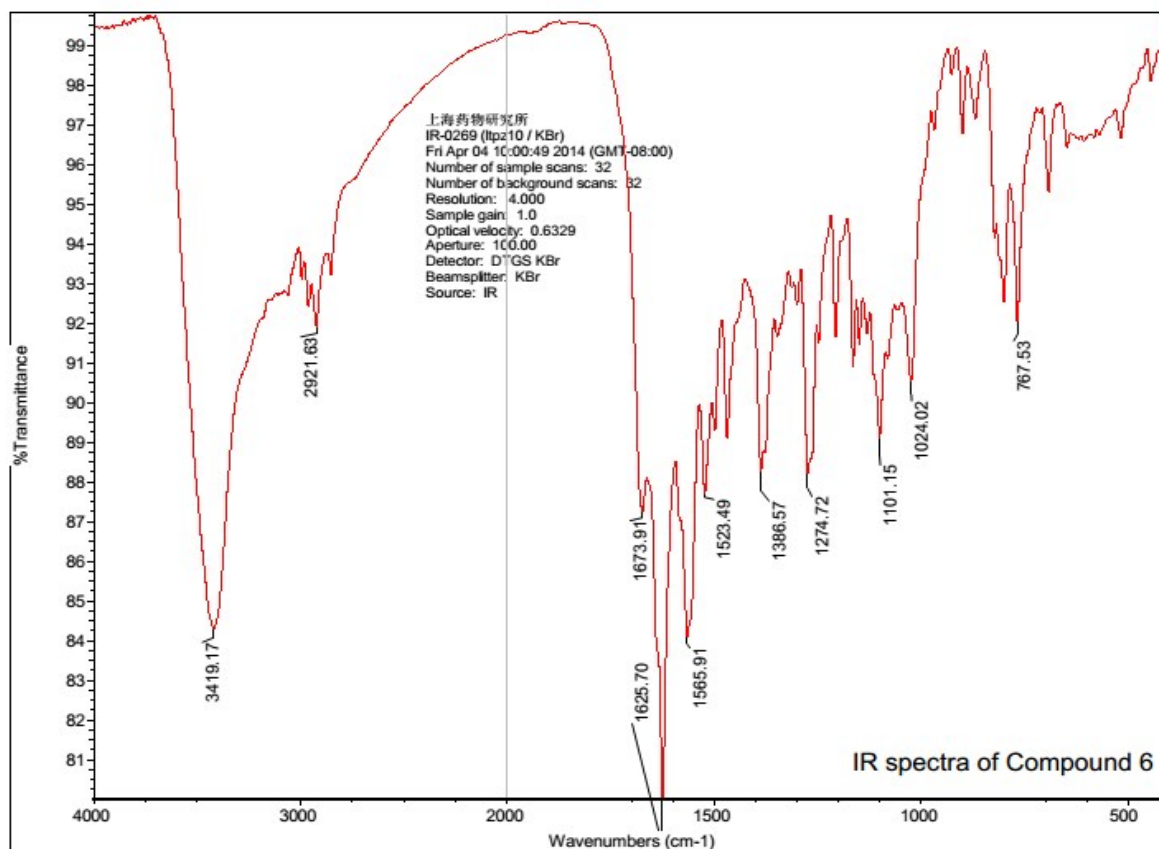

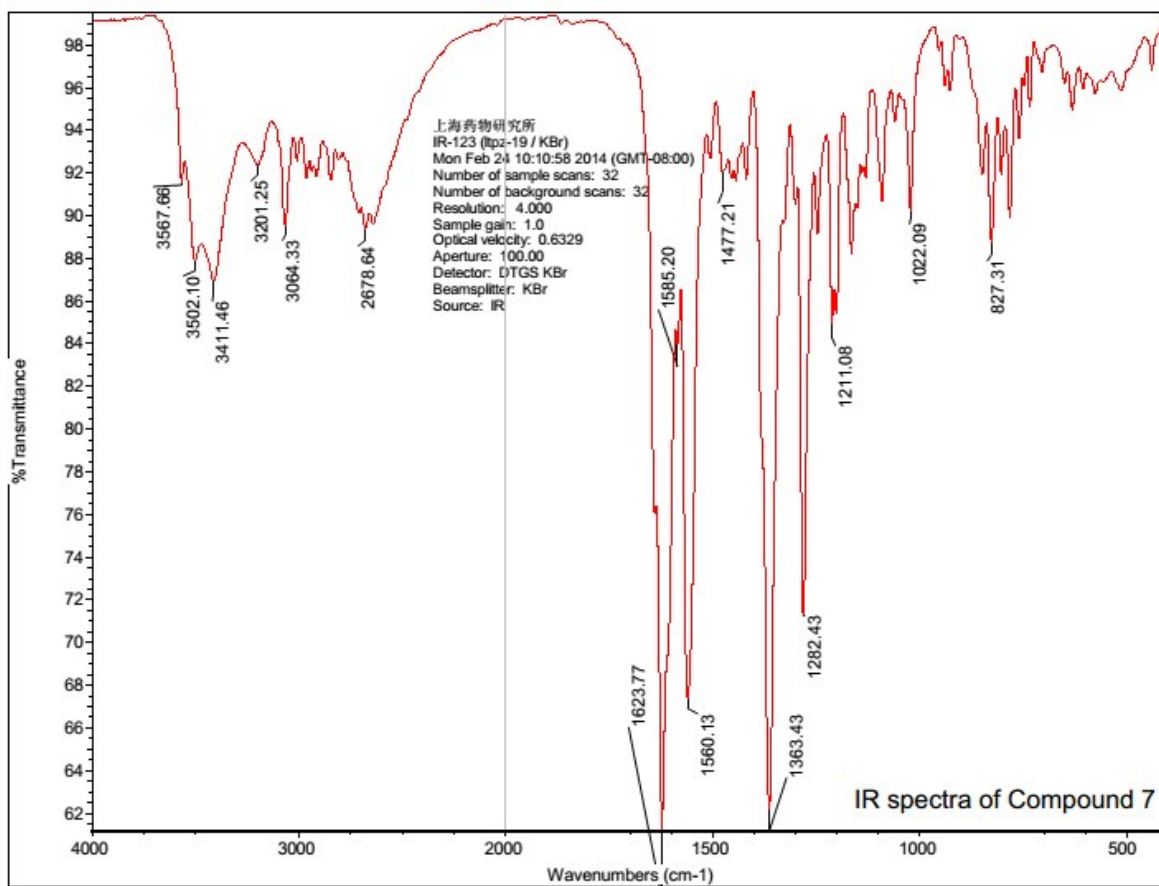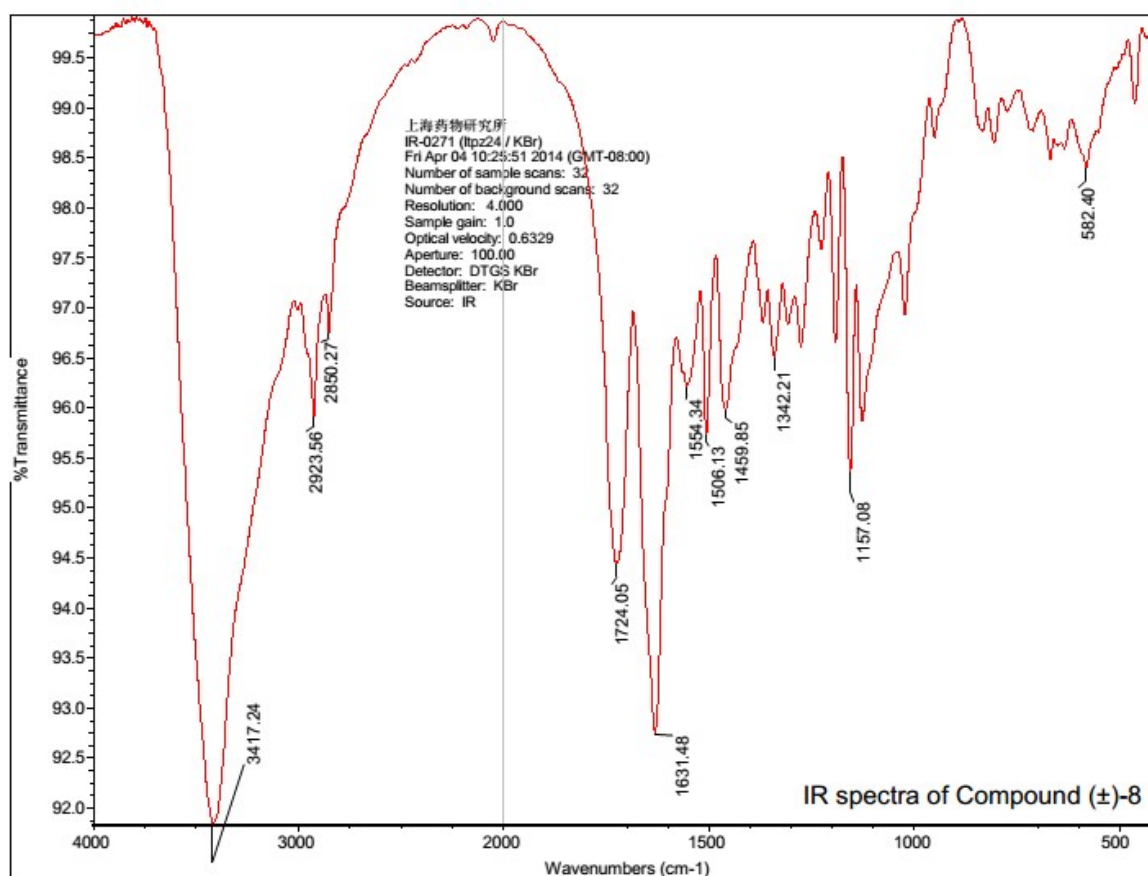

Supplement: c6ra00086j1.pdf [file c6ra00086j1.pdf]
